# Supplementary material for: A human-based multi-gene signature enables quantitative drug repurposing for metabolic disease
Source: eLife. 2022 Jan 17;11:e68832. doi: 10.7554/eLife.68832 (PMC8763401; doi:10.7554/eLife.68832)
Supplement: Supplementary file 1. [file elife-68832-supp1.xlsx]

## Sheet: S1
Signature No	Signature characteristics	Sample Size	Feature Size	Model Directionality	In vivo positive control*	In vitro matches (max 2837)**
Primary models
1	Global RNA: IR disease signature	>1,200	92	Yes	0.51 (3.4x10-04)	77/97
2	Global RNA: IR treatment signature	>500	114	Yes	0.44 (4x10-03)	46/66
3A	Global RNA: Combination 1 + 2 (Clinical Rank)	>2,000	120	Yes	0.63 (2x10-07)	104/150
3B	Global RNA: Combination 1 + 2 (Hub Rank)	>2,000	120	Yes	0.46 (2.4x10-04)	77/111
Clinical comparator
4	GWAS/eQTL: Insulin Resistance	>180,000	37	~Yes	ns	31/78
5	Blood Proteome: Type II Diabetes	>800	81	Yes	0.51 (1x10-03)	48/18
Table S1. Characteristics of the drug repurposing signatures. Maximum positive score is 100, and poorest score being -100. *Scores p<0.01. Concordance and p-value presented for top muscle tissue match (no adipose profiles in database). **Selected from average score > or < 80 +/- 1SD. Raw hit values before QC

## Sheet: S2
Combo RNA - clinical ranked								Combo RNA - network hub score ranked								Fasting IR RNA - clinical ranked								Treatment response RNA - clinical ranked								Proteome case control T2DM								IR 2017 GWAS - top hits
DrugMatrix_sig_A206_Top60_IR-CC								DrugMatrix_sig_A206_Top60_Megena_list								DrugMatrix_Fasting IR 0nly input								DrugMatrix_IR_treatment only input								DrugMatrix_SOMAR T2DM 0nly input								DrugMatrix_2017 IR 37 GWAS 0nly input
drug	Compound	Concentration	Tissue	Time	Concordance	pValue		drug	Compound	Concentration	Tissue	Time	Concordance	pValue		drug	Perturbagen	Concentration	Tissue	Time	Concordance	pValue		drug	Perturbagen	Concentration	Tissue	Time	Concordance	pValue		drug	Perturbagen	Concentration	Tissue	Time	Concordance	pValue		drug	Perturbagen	Concentration	Tissue	Time	Concordance	pValue
DM_3109	FENOFIBRATE	430 mg/kg	thigh muscle	3 d	0.631451	2.35255e-07		DM_1950	BETA-ESTRADIOL	150 mg/kg	thigh muscle	5 d	0.548891	5.59992e-06		DM_3764	LOVASTATIN	1500 mg/kg	thigh muscle	3 d	0.532898	0.00016414		DM_1950	BETA-ESTRADIOL	150 mg/kg	thigh muscle	5 d	0.436777	0.00430102		DM_3264	GEMFIBROZIL	700 mg/kg	thigh muscle	3 d	0.505502	0.00141578		DM_396	CISAPRIDE	250 mg/kg	heart	3 d	0.48	0.00402
DM_1950	BETA-ESTRADIOL	150 mg/kg	thigh muscle	5 d	0.619533	4.58166e-07		DM_1820	ATORVASTATIN	300 mg/kg	thigh muscle	3 d	0.517868	2.25837e-05		DM_3212	FLUVASTATIN	94 mg/kg	thigh muscle	3 d	0.527548	0.000196217		DM_281	BUSPIRONE	196 mg/kg	thigh muscle	5 d	-0.290035	0.0048015										DM_3324	HALOPERIDOL	21 mg/kg	heart	3 d	0.6	0.00541
DM_4667	ROSIGLITAZONE	1800 mg/kg	thigh muscle	3 d	0.609993	7.65988e-07		DM_3212	FLUVASTATIN	94 mg/kg	thigh muscle	3 d	0.517798	2.26515e-05		DM_173	ATENOLOL	1000 mg/kg	thigh muscle	5 d	0.398151	0.000232238		DM_1150	PENTOXIFYLLINE	1170 mg/kg	thigh muscle	5 d	-0.273881	0.00789584
DM_1820	ATORVASTATIN	300 mg/kg	thigh muscle	3 d	0.602081	1.15835e-06		DM_173	ATENOLOL	1000 mg/kg	thigh muscle	5 d	0.389266	2.63362e-05		DM_4449	PRAVASTATIN	1200 mg/kg	thigh muscle	3 d	0.513985	0.000304489																		No match in skeletal muscle
DM_3769	LOVASTATIN	1500 mg/kg	thigh muscle	5 d	0.598475	1.39352e-06		DM_729	GABAPENTIN	2500 mg/kg	thigh muscle	5 d	0.386423	3.0499e-05		DM_1950	BETA-ESTRADIOL	150 mg/kg	thigh muscle	5 d	0.510648	0.000338307																		Best match was LEAD(IV) ACETATE (600 mg/kg) in kidney (Concordance=0.58, p=3.03E-04)
DM_3212	FLUVASTATIN	94 mg/kg	thigh muscle	3 d	0.597487	1.46531e-06		DM_4449	PRAVASTATIN	1200 mg/kg	thigh muscle	3 d	0.497995	5.14886e-05		DM_3907	MEVASTATIN	1200 mg/kg	thigh muscle	5 d	0.508569	0.000361054
DM_2282	CERIVASTATIN	7 mg/kg	thigh muscle	3 d	0.536174	2.45317e-05		DM_3764	LOVASTATIN	1500 mg/kg	thigh muscle	3 d	0.495296	5.73619e-05		DM_3109	FENOFIBRATE	430 mg/kg	thigh muscle	3 d	0.504006	0.000415887
DM_1824	ATORVASTATIN	300 mg/kg	thigh muscle	5 d	0.535976	2.47342e-05		DM_1169	PHENYTOIN	572 mg/kg	thigh muscle	3 d	0.372826	6.04166e-05		DM_3904	MEVASTATIN	1200 mg/kg	thigh muscle	3 d	0.500765	0.000459259
DM_4449	PRAVASTATIN	1200 mg/kg	thigh muscle	3 d	0.532321	2.87626e-05		DM_4452	PRAVASTATIN	1200 mg/kg	thigh muscle	5 d	0.487295	7.86012e-05		DM_1820	ATORVASTATIN	300 mg/kg	thigh muscle	3 d	0.499411	0.000478564
DM_4452	PRAVASTATIN	1200 mg/kg	thigh muscle	5 d	0.531347	2.99344e-05		DM_2282	CERIVASTATIN	7 mg/kg	thigh muscle	3 d	0.467953	0.000163114		DM_4452	PRAVASTATIN	1200 mg/kg	thigh muscle	5 d	0.486916	0.000694151
DM_3764	LOVASTATIN	1500 mg/kg	thigh muscle	3 d	0.524969	3.87601e-05		DM_647	FAMOTIDINE	1200 mg/kg	thigh muscle	5 d	0.347387	0.000200566		DM_2282	CERIVASTATIN	7 mg/kg	thigh muscle	3 d	0.486393	0.000704822
DM_4746	SIMVASTATIN	1200 mg/kg	thigh muscle	3 d	0.491775	0.00013727		DM_3109	FENOFIBRATE	430 mg/kg	thigh muscle	3 d	0.457419	0.000238436		DM_1127	OXYBUTYNIN	230 mg/kg	thigh muscle	5 d	0.368348	0.000715938
DM_3115	FENOFIBRATE	215 mg/kg	thigh muscle	5 d	0.485963	0.000169069		DM_1140	PAROXETINE	104 mg/kg	thigh muscle	3 d	0.332564	0.000385652		DM_4667	ROSIGLITAZONE	1800 mg/kg	thigh muscle	3 d	0.477901	0.000899989
DM_4671	ROSIGLITAZONE	1800 mg/kg	thigh muscle	5 d	0.455963	0.000468002		DM_1824	ATORVASTATIN	300 mg/kg	thigh muscle	5 d	0.441032	0.000420264		DM_1824	ATORVASTATIN	300 mg/kg	thigh muscle	5 d	0.461426	0.001421
DM_173	ATENOLOL	1000 mg/kg	thigh muscle	5 d	0.332515	0.000528961		DM_4667	ROSIGLITAZONE	1800 mg/kg	thigh muscle	3 d	0.440852	0.000422828		DM_1169	PHENYTOIN	572 mg/kg	thigh muscle	3 d	0.32851	0.00275156
DM_2285	CERIVASTATIN	7 mg/kg	thigh muscle	5 d	0.448601	0.000592529		DM_1288	SPIRONOLACTONE	300 mg/kg	thigh muscle	5 d	0.330358	0.000423886		DM_685	FLUNARIZINE	126 mg/kg	thigh muscle	5 d	0.325314	0.00304289
DM_1142	PAROXETINE	104 mg/kg	thigh muscle	5 d	0.322547	0.000791579		DM_3904	MEVASTATIN	1200 mg/kg	thigh muscle	3 d	0.440338	0.000430213		DM_1984	BEZAFIBRATE	617 mg/kg	thigh muscle	3 d	0.423196	0.00377398
DM_3904	MEVASTATIN	1200 mg/kg	thigh muscle	3 d	0.422917	0.00129633		DM_3115	FENOFIBRATE	215 mg/kg	thigh muscle	5 d	0.433638	0.000537775		DM_3264	GEMFIBROZIL	700 mg/kg	thigh muscle	3 d	0.42027	0.00404869
DM_3216	FLUVASTATIN	94 mg/kg	thigh muscle	5 d	0.417751	0.00150645		DM_1142	PAROXETINE	104 mg/kg	thigh muscle	5 d	0.32362	0.000563354		DM_1358	TRIMETHADIONE	535 mg/kg	thigh muscle	5 d	0.30721	0.00527545
DM_685	FLUNARIZINE	126 mg/kg	thigh muscle	5 d	0.299348	0.00192121		DM_772	GUANETHIDINE	132 mg/kg	thigh muscle	3 d	0.315279	0.000793973		DM_1142	PAROXETINE	104 mg/kg	thigh muscle	5 d	0.306185	0.00543699
DM_647	FAMOTIDINE	1200 mg/kg	thigh muscle	5 d	0.29731	0.00206991		DM_4746	SIMVASTATIN	1200 mg/kg	thigh muscle	3 d	0.412124	0.00106839		DM_4671	ROSIGLITAZONE	1800 mg/kg	thigh muscle	5 d	0.396095	0.0070715
DM_3264	GEMFIBROZIL	700 mg/kg	thigh muscle	3 d	0.406356	0.00208106		DM_727	GABAPENTIN	2500 mg/kg	thigh muscle	3 d	0.295118	0.00174874
DM_171	ATENOLOL	1000 mg/kg	thigh muscle	3 d	-0.291599	0.00254358		DM_3264	GEMFIBROZIL	700 mg/kg	thigh muscle	3 d	0.381495	0.00263385
DM_1984	BEZAFIBRATE	617 mg/kg	thigh muscle	3 d	0.390861	0.00317286		DM_3769	LOVASTATIN	1500 mg/kg	thigh muscle	5 d	0.381305	0.00264797
DM_1169	PHENYTOIN	572 mg/kg	thigh muscle	3 d	0.275283	0.00448072		DM_1127	OXYBUTYNIN	230 mg/kg	thigh muscle	5 d	0.28337	0.0027016
DM_3907	MEVASTATIN	1200 mg/kg	thigh muscle	5 d	0.36385	0.00632021		DM_4671	ROSIGLITAZONE	1800 mg/kg	thigh muscle	5 d	0.375957	0.00307318
								DM_639	ETIDRONATE	1005 mg/kg	thigh muscle	5 d	0.274854	0.00366147
								DM_1358	TRIMETHADIONE	535 mg/kg	thigh muscle	5 d	0.270508	0.00426066
								DM_3472	INDOMETHACIN	9.6 mg/kg	thigh muscle	3 d	0.363652	0.0042892
								DM_685	FLUNARIZINE	126 mg/kg	thigh muscle	5 d	0.254219	0.00736232
																DM_201
																DM_85
																DM_86
																DM_202
																DM_87
																DM_26
																DM_405
																DM_4954
																DM_895
																DM_1362
																DM_880
																DM_3976
																DM_292
																DM_3018
																DM_1638
																DM_1893
																DM_762
																DM_618
																DM_890
																DM_3289
																DM_1791
																DM_2770
																DM_1894
																DM_27
																DM_3024
																DM_2110
																DM_3647
																DM_3618
																DM_1639
																DM_3045
																DM_2127
																DM_5149
																DM_887
																DM_4077
																DM_3280
																DM_1146
																DM_4542
																DM_2111
																DM_1701
																DM_1450
																DM_1995
																DM_5060
																DM_668
																DM_1166
																DM_1448
																DM_3660
																DM_393
																DM_4947
																DM_2115
																DM_2943
																DM_881
																DM_3688
																DM_2143
																DM_323
																DM_5009
																DM_4168
																DM_1803
																DM_4023
																DM_403
																DM_5186
																DM_1570
																DM_3974
																DM_1936
																DM_4081
																DM_2949
																DM_1640
																DM_2873
																DM_2116
																DM_4133
																DM_5142
																DM_2875
																DM_2205
																DM_2427
																DM_4483
																DM_4633
																DM_1555
																DM_2867
																DM_5276
																DM_1875
																DM_2147
																DM_4896
																DM_1494
																DM_4215
																DM_3643
																DM_3762
																DM_4484
																DM_4555
																DM_2946
																DM_2958
																DM_1788
																DM_3290
																DM_3065
																DM_5144
																DM_2135
																DM_3129
																DM_3664
																DM_2530
																DM_4396
																DM_2464
																DM_4867
																DM_5124
																DM_1658
																DM_4042
																DM_2108
																DM_3639
																DM_1626
																DM_2249
																DM_1892
																DM_5023
																DM_2433
																DM_2967
																DM_1836
																DM_2723
																DM_3504
																DM_1931
																DM_3220
																DM_4004
																DM_4885
																DM_4648
																DM_2968
																DM_1761
																DM_3407
																DM_2912
																DM_3063
																DM_1655
																DM_1421
																DM_5203
																DM_1452
																DM_126
																DM_1005
																DM_1389
																DM_375
																DM_3295
																DM_316
																DM_314
																DM_1003
																DM_935
																DM_1299
																DM_3084
																DM_1925
																DM_327
																DM_3191
																DM_329
																DM_3299
																DM_628
																DM_331
																DM_3715
																DM_4684
																DM_1878
																DM_1713
																DM_714
																DM_5055
																DM_2033
																DM_4524
																DM_1341
																DM_870
																DM_2164
																DM_1303
																DM_358
																DM_5073
																DM_1387
																DM_5256
																DM_1097
																DM_3427
																DM_973
																DM_44
																DM_102
																DM_4853
																DM_3192
																DM_3717
																DM_1185
																DM_336
																DM_5072
																DM_4420
																DM_3435
																DM_4822
																DM_3296
																DM_2331
																DM_2172
																DM_3181
																DM_4241
																DM_2332
																DM_1952
																DM_2963
																DM_1687
																DM_3789
																DM_3790
																DM_3185
																DM_3453
																DM_3025
																DM_5003
																DM_3390
																DM_3798
																DM_3710
																DM_2082
																DM_3791
																DM_2445
																DM_5048
																DM_1560
																DM_1457
																DM_4369
																DM_4280
																DM_3309
																DM_3298
																DM_4528
																DM_4819
																DM_1900
																DM_5053
																DM_4703
																DM_4281
																DM_3737
																DM_2881
																DM_3457
																DM_2932
																DM_2439
																DM_3513
																DM_5215
																DM_4583
																DM_4233
																DM_4285
																DM_5049
																DM_2230
																DM_2799
																DM_4417
																DM_1979
																DM_4728
																DM_2163
																DM_4116
																DM_5252
																DM_3272
																DM_3921
																DM_1486
																DM_1422
																DM_2570
																DM_3703
																DM_4036
																DM_3679
																DM_3131
																DM_3194
																DM_4582
																DM_5255
																DM_3899
																DM_3897
																DM_4054
																DM_1620
																DM_2478
																DM_3425
																DM_2499
																DM_2026
																DM_3086
																DM_3674
																DM_3398
																DM_3879
																DM_2103
																DM_2169
																DM_4732
																DM_1458
																DM_4152
																DM_2203
																DM_2500
																DM_1619
																DM_1981
																DM_4035
																DM_2666
																DM_2295
																DM_1612
																DM_2921
																DM_3468
																DM_3465
																DM_3881
																DM_4092
																DM_3346
																DM_4321
																DM_1817
																DM_3473
																DM_4961
																DM_4764
																DM_1649
																DM_5052
																DM_1926
																DM_3189
																DM_3297
																DM_1781
																DM_4018
																DM_3011
																DM_1488
																DM_1266
																DM_1006
																DM_2216
																DM_1339
																DM_3591
																DM_3423
																DM_3721
																DM_1370
																DM_979
																DM_5213
																DM_4817
																DM_4740
																DM_1484
																DM_4979
																DM_2545
																DM_5167
																DM_2339
																DM_2473
																DM_1648
																DM_2416
																DM_3545
																DM_5228
																DM_3628
																DM_3613
																DM_2188
																DM_5176
																DM_3724
																DM_4180
																DM_1599
																DM_3604
																DM_3645

## Sheet: S3
Scores >70 and <70 are considered inactive based on the upper and lower 10% (+/- 1 SD)																	9-Cell maximum quantile statistic (n=27 per score)		Individual within cell type normalised data (n=3 per score)
Pubchem name	CLUE Assay	LINCS match	inchikey	CID	ChEMBL	smiles	canonical_smiles	Pubchem name	CLUE drug name	Alternative name	Estimated top_target	Drug group description (JAT)	Target notes	PubMed (notes)	Kinase (ChEMBL)	Targets a Kinase (manual)	IR signature 3A (Disease + Treatment)	Linear_age_120	PC3	VCAP	A375	A549	HA1E	HCC515	HT29	MCF7	HEPG2
(S)-[(2R,5R)-5-Ethyl-1-azabicyclo[2.2.2]octan-2-yl]-(6-methoxyquinolin-4-yl)methanol	BRD-A06390036	LINCSCP_191678	LJOQGZACKSYWCH-NBGVHYBESA-N	442912	CHEMBL1906890	CC[C@H]1CN2CCC1C[C@@H]2[C@@H](O)c1ccnc2ccc(OC)cc12	CC[C@H]1CN2CCC1C[C@@H]2[C@@H](O)c1ccnc2ccc(OC)cc12	(S)-[(2R,5R)-5-Ethyl-1-azabicyclo[2.2.2]octan-2-yl]-(6-methoxyquinolin-4-yl)methanol	hydroquinidine	hydroquinidine	Unknown	Inflammatory	Unknown		No		-72.36		40.61	0	-85.69	-67.79	0	18.04	-89.79	-65.66	-87.6
Spectrum_001095	BRD-A07000685	LINCSCP_14958	VWQWXZAWFPZJDA-PILPDLGISA-N	5702069	CHEMBL343545	C[C@]12C[C@H](O)C3C(CCC4=CC(=O)CC[C@]34C)C1CC[C@]2(O)C(=O)COC(=O)CCC(O)=O	C[C@]12C[C@H](O)C3C(CC=C4CC(=O)CC[C@@]43C)C1CC[C@]2(O)C(=O)COC(=O)CCC(=O)O	Spectrum_001095	Pharmakon1600-01500339	Pharmakon1600-01500339	Unknown	Glucocorticoid	Hydrocortisone-like, ANXA1, NOS2, NR3C1, NR3C2	anti-inflammatory	No		82.22		90.69	0	66.54	-67.97	30.47	91.51	56.69	83.58	NaN
Wortmannin from Penicillium funiculosum	BRD-A11678676	LINCSCP_11224	QDLHCMPXEPAAMD-ZGSWIPFCSA-N	3003565	CHEMBL295038	COC[C@H]1OC(=O)c2coc3C(=O)C4=C([C@@H](C[C@@]5(C)C4CCC5=O)OC(=O)C)[C@]1(C)c23	COC[C@H]1OC(=O)c2coc3c2[C@@]1(C)C1=C(C3=O)C2CCC(=O)[C@@]2(C)CC1OC(C)=O	Wortmannin from Penicillium funiculosum	wortmannin	wortmannin	PIK3CA	PI3K	631nM TDP1		No	kinase	77.22	93.43	-13.63	13.73	34.29	49.77	92.34	80.73	90.42	79.07	0
Chembl3039448	BRD-A13133631	LINCSCP_104489	FAOZLTXFLGPHNG-KXWDGVDDSA-N	5702058	No result	C[C@H]1CC2C3CC[C@](O)(C(C)=O)[C@@]3(C)C[C@H](O)[C@]2(F)C2(C)C=CC(=O)C=C12	CC(=O)[C@@]1(O)CCC2C3CC(C)=C4CC(=O)C=CC4(C)[C@@]3(F)[C@@H](O)C[C@@]21C	Chembl3039448	Spectrum_001832	Spectrum_001832 (like Prednisolone)	Unknown	Glucocorticoid	Prednisolone-like	anti-inflammatory	No		70.18		0	0	78.05	-71.19	96.16	92.4	53.34	-25.32	NaN
(10As)-9-(hydroxymethyl)-6,6-dimethyl-3-(2-methyloctan-2-yl)-6a,7,10,10a-tetrahydrobenzo[c][1]benzopyran-1-ol	BRD-A15010982	LINCSCP_16221	SSQJFGMEZBFMNV-XJDOXCRVSA-N	9886498	CHEMBL41721	CCCCCCC(C)(C)c1cc(O)c2[C@H]3CC(CO)=CCC3C(C)(C)Oc2c1	CCCCCCC(C)(C)c1cc(O)c2c(c1)OC(C)(C)C1CC=C(CO)C[C@H]21	(10As)-9-(hydroxymethyl)-6,6-dimethyl-3-(2-methyloctan-2-yl)-6a,7,10,10a-tetrahydrobenzo[c][1]benzopyran-1-ol	HU-211	HU-211	CNR2	Cannabinoid	CNR1, CNR2, GLRA1, GLRA2, GLRA3, GPR55, GRIN1, NFKB1		No		-72.05		0	59.27	0	-24.43	-95.8	0	-72.55	-76.53	NaN
Phorbol myristate acetate	BRD-A15079084	LINCSCP_10289	PHEDXBVPIONUQT-UHFFFAOYSA-N	4792	No result	CCCCCCCCCCCCCC(=O)OC1C(C)C2(O)C3C=C(C)C(=O)C3(O)CC(=CC2C4C(C)(C)C41OC(=O)C)CO	CCCCCCCCCCCCCC(=O)OC1C(C)C2(O)C(C=C(CO)CC3(O)C(=O)C(C)=CC32)C2C(C)(C)C12OC(C)=O	Phorbol myristate acetate	phorbol-12-myristate-13-acetate	Phorbol myristate	PRKCA	inflammatory	<1nM PRKCE, <5nM PRKCD, PRKCB, PRKCA, ALL PRKC's	protein kinase Calpha activation and block of insulin induction of protein kinase Czeta. These changes persisted in isolated adipocytes from the transgenic mice and were rescued by the protein kinase C inhibitor bisindolylmaleimide	No	kinase	-86.79		-19.08	-32.05	-87.12	-66.9	-67.51	-93.12	-35.9	-96.05	-86.63
Butoconazole	BRD-A16665823	LINCSCP_101591	SWLMUYACZKCSHZ-UHFFFAOYSA-N	47472	CHEMBL1295	Clc1ccc(CCC(Cn2ccnc2)Sc2c(Cl)cccc2Cl)cc1	Clc1ccc(CCC(Cn2ccnc2)Sc2c(Cl)cccc2Cl)cc1	Butoconazole	butoconazole	butoconazole	Unknown	Antifungal	Unknown		No		73.69		58.85	98.84	44.87	83.3	62.08	62.75	55.02	71.61	85.11
n/a	BRD-A16820783	LINCSCP_15914	No result	No result	No result	COc1ccc(OC)c(c1)c2nnc3SCC(=Nn23)c4ccc(OC)c(OC5CCOC5)c4	COc1ccc(OC)c(-c2nnc3n2N=C(c2ccc(OC)c(OC4CCOC4)c2)CS3)c1	n/a	BRD-A16820783	BRD-A16820783	PDE	PDE	PDE		No		-95.33		-88.2	-50.7	33.11	-98.6	-84.46	0	-91.05	-30.84	-88.28
4-[(1R,4Z,8Z,10S,13R,15R)-15-Hydroxy-5,10-dimethyl-3-oxo-2,14-dioxabicyclo[11.3.1]heptadeca-4,8-dien-15-yl]-1,3-thiazolidin-2-one	BRD-A19248578	LINCSCP_10671	NSHPHXHGRHSMIK-IWZLBRJHSA-N	16760044	CHEMBL1865009	C[C@H]1CC[C@@H]2C[C@H](C[C@@](O)(O2)C2CSC(=O)N2)OC(=O)\C=C(C)/CC\C=C/1	CC1=CC(=O)O[C@@H]2C[C@@H](CC[C@H](C)/C=C\CC1)O[C@@](O)(C1CSC(=O)N1)C2	4-[(1R,4Z,8Z,10S,13R,15R)-15-Hydroxy-5,10-dimethyl-3-oxo-2,14-dioxabicyclo[11.3.1]heptadeca-4,8-dien-15-yl]-1,3-thiazolidin-2-one	latrunculin-b	latrunculin-b	ACTA1	Actin inhibitor	ACTA1, MKL1, SPIRE2		No		-71.64	87.86	13.99	-93.31	51.2	50.76	57.17	-72.72	-81.15	-56.22	NaN
Vincaleukoblastine	BRD-A22783572	LINCSCP_11226	JXLYSJRDGCGARV-XQKSVPLYSA-N	241903	CHEMBL22969	CCC1(O)CC2CN(C1)CCc3c([nH]c4ccccc34)C(C2)(C(=O)OC)c5cc6c(cc5OC)N(C)C7C86CCN9CC=CC(CC)(C98)C(C(=O)OC)C7(O)C(=O)OC	CCC1(O)CC2CN(CCc3c([nH]c4ccccc34)C(C(=O)OC)(c3cc4c(cc3OC)N(C)C3C(O)(C(=O)OC)C(C(=O)OC)C5(CC)C=CCN6CCC43C65)C2)C1	Vincaleukoblastine	vinblastine	vinblastine	TUBB	Tubulin inhibitor	TUBB, JUN, TUBA1A, TUBD1, TUBE1, TUBG1		No		-88.86		-59.15	-30.12	-28.94	-48.95	-98.75	-58.63	-92.51	-77.55	-89.38
Ofloxacin	BRD-A24228527	LINCSCP_102495	GSDSWSVVBLHKDQ-UHFFFAOYSA-N	4583	CHEMBL4	CC1COc2c(N3CCN(C)CC3)c(F)cc3c2n1cc(C(O)=O)c3=O	CC1COc2c(N3CCN(C)CC3)c(F)cc3c(=O)c(C(=O)O)cn1c23	Ofloxacin	ofloxacin	ofloxacin	TOP2A	Antibacterial	TOP2A		No		-74.49		-40.72	-19.8	0	39.71	-82.99	-76.19	-94.53	-9.61	NaN
(2S,3R)-2-[(6,7-Dimethoxy-1,2,3,4-tetrahydroisoquinolin-1-yl)methyl]-3-ethyl-9,10-dimethoxy-2,3,4,6,7,11b-hexahydro-1H-benzo[a]quinolizine	BRD-A25687296	LINCSCP_11371	AUVVAXYIELKVAI-VXNUJMKFSA-N	5702048	No result	CC[C@H]1CN2CCc3cc(OC)c(OC)cc3C2C[C@@H]1CC1NCCc2cc(OC)c(OC)cc12	CC[C@H]1CN2CCc3cc(OC)c(OC)cc3C2C[C@@H]1CC1NCCc2cc(OC)c(OC)cc21	(2S,3R)-2-[(6,7-Dimethoxy-1,2,3,4-tetrahydroisoquinolin-1-yl)methyl]-3-ethyl-9,10-dimethoxy-2,3,4,6,7,11b-hexahydro-1H-benzo[a]quinolizine	emetine	emetine	RPS2	Protein synthesis inhibitor	RPS2	Inhibitor of protein synthesis - PMID: 26846849. increases. GLUT1 expression PMID: 9788740	No		88.62	95.31	72.48	NaN	57.47	30.45	81.71	81.76	49.64	20	72.69
Nifedipine	BRD-A30977374	LINCSCP_178650	HYIMSNHJOBLJNT-UHFFFAOYSA-N	4485	CHEMBL193	COC(=O)C1C(C(=C(C)N=C1C)C(=O)OC)c2ccccc2[N+](=O)[O-]	COC(=O)C1=C(C)N=C(C)C(C(=O)OC)C1c1ccccc1[N+](=O)[O-]	Nifedipine	nifedipine	BRD-K96354014	CACNA1C	Calcium	CACNA1C, CACNA1D, CACNA1S, CACNA2D1, CACNA1F, CACNA1H, CACNB2, CALM1, CYP3A5, GLRA1, GLRA3, GLRB, KCNA1, KCNA5, NR1I2, TRPM3	"nifedipine ameliorates nonalcoholic fatty liver disease by restoring autophagic". PMID: 30623792, PMID: 12441210. Improve glucose toleranceand lowers lipids PMID: 26849821 PMID ﻿20847723 PMID: 10052641 but not in this study PMID: 9633024 "In contrast, nifedipine-treated patients had similar plasma insulin, but lower plasma glucose and triglyceride concentrations after four months of therapy. " P…	No		86.77	75.78	91.41	75.8	29.58	-19.51	-98.61	NaN	95.9	49.74	NaN
4-[3-(3-Dioxaziridinyl)phenyl]-5-(3-hydroxy-1-oxopropyl)-2,6-dimethyl-1-prop-2-ynyl-4H-pyridine-3-carboxylic acid methyl ester	BRD-A32949107	LINCSCP_17865	VNIMHBLANIQWNY-UHFFFAOYSA-N	5202074	No result	COC(=O)C1=C(C)N(CC#C)C(=C(C1c2cccc(c2)n3oo3)C(=O)CCO)C	C#CCN1C(C)=C(C(=O)CCO)C(c2cccc(-n3oo3)c2)C(C(=O)OC)=C1C	4-[3-(3-Dioxaziridinyl)phenyl]-5-(3-hydroxy-1-oxopropyl)-2,6-dimethyl-1-prop-2-ynyl-4H-pyridine-3-carboxylic acid methyl ester	MRS-1845	MRS-1845	ORAI1	Calcium	ORAI1		No		71.6		-37.92	99.96	73.47	0	83.32	0	75.83	70.81	-60.1
5-[(3S,10R,13R,14S,17R)-14-Hydroxy-10,13-dimethyl-3-[(2R,3R,4R,5R,6S)-3,4,5-trihydroxy-6-methyloxan-2-yl]oxy-1,2,3,6,7,8,9,11,12,15,16,17-dodecahydrocyclopenta[a]phenanthren-17-yl]pyran-2-one	BRD-A34806832	LINCSCP_11124	MYEJFUXQJGHEQK-BVLCKXLMSA-N	9828429	CHEMBL1551716	C[C@@H]1O[C@@H](O[C@H]2CC[C@]3(C)C4CC[C@]5(C)[C@H](CC[C@]5(O)C4CCC3=C2)c6ccc(=O)oc6)[C@H](O)[C@H](O)[C@H]1O	C[C@@H]1O[C@@H](O[C@@H]2C=C3CCC4C(CC[C@]5(C)[C@@H](c6ccc(=O)oc6)CC[C@]45O)[C@@]3(C)CC2)[C@H](O)[C@H](O)[C@H]1O	5-[(3S,10R,13R,14S,17R)-14-Hydroxy-10,13-dimethyl-3-[(2R,3R,4R,5R,6S)-3,4,5-trihydroxy-6-methyloxan-2-yl]oxy-1,2,3,6,7,8,9,11,12,15,16,17-dodecahydrocyclopenta[a]phenanthren-17-yl]pyran-2-one	proscillaridin	proscillaridin	ATP1A1	ATPase	ATP1A1		No	kinase	77.06		75.04	0	50.2	95.73	0	76.44	26.98	-70.74	77.34
5-(6-Aminopurin-9-yl)-N-ethyl-3,4-dihydroxy-2-oxolanecarboxamide	BRD-A35338386	LINCSCP_18485	JADDQZYHOWSFJD-UHFFFAOYSA-N	2868392	CHEMBL277076	CCNC(=O)C1OC(C(O)C1O)n2cnc3c(N)ncnc23	CCNC(=O)C1OC(n2cnc3c(N)ncnc32)C(O)C1O	5-(6-Aminopurin-9-yl)-N-ethyl-3,4-dihydroxy-2-oxolanecarboxamide	NECA	NECA	ADORA1	Adenosine receptor agonist	ADORA1, ADORA2A, ADORA2B, ADORA3, HSP90B1		No		-65.46	-76.44	65.77	-51.44	0	60.43	-74.11	0	-93.1	-78.89	0
5-(1H-Indol-3-ylmethyl)-3-methyl-2-thioxo-4-Imidazolidinone	BRD-A36318220	LINCSCP_15184	TXUWMXQFNYDOEZ-UHFFFAOYSA-N	2828334	CHEMBL195008	CN1C(=S)NC(Cc2c[nH]c3ccccc23)C1=O	Cn1c(O)c(Cc2c[nH]c3ccccc23)[nH]c1=S	5-(1H-Indol-3-ylmethyl)-3-methyl-2-thioxo-4-Imidazolidinone	necrostatin-1	necrostatin-1	IDO1	RNA	IDO1, KRR1, RIPK1	RIPK inhibitor, indoleamine 2,3-dioxygenase inhibitor	No	Indirect Kinase modulator	70.62		-48.01	38.83	82.37	8.54	65.49	46.76	69.49	96.92	28.53
(3S,10S,13S)-17-[(5R)-5-Hydroxy-6-methylheptan-2-yl]-10,13-dimethyl-2,3,4,7,8,9,11,12,14,15,16,17-dodecahydro-1H-cyclopenta[a]phenanthren-3-ol	BRD-A36707673	LINCSCP_10979	IOWMKBFJCNLRTC-JNZINCJWSA-N	73707416	No result	CC(C)[C@H](O)CCC(C)C1CCC2C3CC=C4C[C@@H](O)CC[C@@]4(C)C3CC[C@@]12C	CC(CC[C@@H](O)C(C)C)C1CCC2C3CC=C4C[C@@H](O)CC[C@@]4(C)C3CC[C@@]12C	(3S,10S,13S)-17-[(5R)-5-Hydroxy-6-methylheptan-2-yl]-10,13-dimethyl-2,3,4,7,8,9,11,12,14,15,16,17-dodecahydro-1H-cyclopenta[a]phenanthren-3-ol	hydroxycholesterol	hydroxycholesterol	ABCA1	Metabolic	ABCA1, NR1H2, NR1H3	Cholesterol?	No		-90.92		-95.05	60.66	0	0	-80.69	0	-80.78	0	-87.48
(-)-Physostigmine	BRD-A37052580	LINCSCP_178655	PIJVFDBKTWXHHD-WUJWULDRSA-N	11403114	CHEMBL306319	CNC(=O)Oc1ccc2N(C)C3N(C)CC[C@@]3(C)c2c1	CNC(=O)Oc1ccc2c(c1)[C@]1(C)CCN(C)C1N2C	(-)-Physostigmine	physostigmine	physostigmine	ACHE	Cholinesterase inhibitor	ACHE, BCHE		No		-71.17	-88.35	-89.69	-41.08	0	54.05	-34.1	NaN	-77.41	38.29	NaN
[4-(4-Amino-6,7-dimethoxy-2-quinazolinyl)-2,3,4a,5,6,7,8,8a-octahydroquinoxalin-1-yl]-(2-furanyl)methanone	BRD-A37837077	LINCSCP_22470	XBRXTUGRUXGBPX-UHFFFAOYSA-N	2894	CHEMBL97698	COc1cc2nc(nc(N)c2cc1OC)N1CCN(C2CCCCC12)C(=O)c1ccco1	COc1cc2nc(N3CCN(C(=O)c4ccco4)C4CCCCC43)nc(N)c2cc1OC	[4-(4-Amino-6,7-dimethoxy-2-quinazolinyl)-2,3,4a,5,6,7,8,8a-octahydroquinoxalin-1-yl]-(2-furanyl)methanone	cyclazosin	cyclazosin	ADRA1B	Adrenergic	ADRA1B, ADRA1A, ADRA1D	Agonism can lead to IR	No		81.32		-22.16	85.66	87.08	-65.9	79.6	0	0	5.89	84.25
6,9-Dimethyl-3-[6-(2-oxiranyl)-6-oxohexyl]-1,4,7,10-tetrazabicyclo[10.3.0]pentadecane-2,5,8,11-tetrone	BRD-A39646320	LINCSCP_10982	GNYCTMYOHGBSBI-UHFFFAOYSA-N	3571	No result	CC1NC(=O)C2CCCN2C(=O)C(CCCCCC(=O)C2CO2)NC(=O)C(C)NC1=O	CC1NC(=O)C(C)NC(=O)C2CCCN2C(=O)C(CCCCCC(=O)C2CO2)NC1=O	6,9-Dimethyl-3-[6-(2-oxiranyl)-6-oxohexyl]-1,4,7,10-tetrazabicyclo[10.3.0]pentadecane-2,5,8,11-tetrone	HC-toxin	HC-toxin	HDAC1	HDAC inhibitor	HDAC1		No		-82.4	-72.27	0	-83.78	-97.79	55.2	0	-77.67	-88.62	-49.41	0
(6Ar,9R)-N-[(1S,2S,4R,7S)-7-benzyl-2-hydroxy-5,8-dioxo-4-propan-2-yl-3-oxa-6,9-diazatricyclo[7.3.0.02,6]dodecan-4-yl]-7-methyl-6,6a,8,9,10,10a-hexahydro-4H-indolo[4,3-fg]quinoline-9-carboxamide	BRD-A44701612	LINCSCP_204	DEQITUUQPICUMR-DLVWBKJWSA-N	11072143	No result	CC(C)C1(NC(=O)C2CC3C(Cc4c[nH]c5cccc3c45)N(C)C2)OC6(O)C7CCCN7C(=O)C(Cc8ccccc8)N6C1=O	CC(C)C1(NC(=O)C2CC3c4cccc5[nH]cc(c45)CC3N(C)C2)OC2(O)C3CCCN3C(=O)C(Cc3ccccc3)N2C1=O	(6Ar,9R)-N-[(1S,2S,4R,7S)-7-benzyl-2-hydroxy-5,8-dioxo-4-propan-2-yl-3-oxa-6,9-diazatricyclo[7.3.0.02,6]dodecan-4-yl]-7-methyl-6,6a,8,9,10,10a-hexahydro-4H-indolo[4,3-fg]quinoline-9-carboxamide	dihydroergocristine	BRD-A65076780	HTR2A	Adrenergic	HTR2A, ADRA1A, ADRB1, DRD1, DRD2, DRD3, DRD4, DRD5, HTR1A, HTR3A, HTR4, HTR5A, HTR6, HTR7	Agonism can lead to IR	No		71.22		73.12	0	-41.16	50.8	0	79.3	0	97.28	NaN
N-[4-[1-(1,4-Dioxaspiro[4.5]dec-8-yl)-4-(8-oxa-3-azabicyclo[3.2.1]oct-3-yl)-1H-pyrazolo[3,4-d]pyrimidin-6-yl]phenyl]-N'-methylurea	BRD-A45498368	LINCSCP_10983	QLHHRYZMBGPBJG-UHFFFAOYSA-N	25260757	CHEMBL601661	CNC(=O)Nc1ccc(cc1)-c1nc(N2CC3CCC(C2)O3)c2cnn(C3CCC4(CC3)OCCO4)c2n1	CNC(=O)Nc1ccc(-c2nc(N3CC4CCC(C3)O4)c3cnn(C4CCC5(CC4)OCCO5)c3n2)cc1	N-[4-[1-(1,4-Dioxaspiro[4.5]dec-8-yl)-4-(8-oxa-3-azabicyclo[3.2.1]oct-3-yl)-1H-pyrazolo[3,4-d]pyrimidin-6-yl]phenyl]-N'-methylurea	WYE-125132	WYE-125132	MTOR	MTOR	<1nM MTOR, 1uM PIK3CA		Yes	kinase	84.69	97.59	42.1	73.59	70.98	72.48	0	81.01	44.86	93.4	0
4-Oxo-4-[[(1S,4S,5R,8S,9R,13R)-1,5,9-trimethyl-11,14,15,16-tetraoxatetracyclo[10.3.1.04,13.08,13]hexadecan-10-yl]oxy]butanoic acid	BRD-A47829399	LINCSCP_10302	FIHJKUPKCHIPAT-AURIRKAZSA-N	73707396	No result	C[C@@H]1CC[C@H]2[C@@H](C)C(OC(=O)CCC(O)=O)OC3O[C@]4(C)CC[C@@H]1[C@@]23OO4	C[C@@H]1CC[C@H]2[C@@H](C)C(OC(=O)CCC(=O)O)OC3O[C@]4(C)CC[C@@H]1[C@]32OO4	4-Oxo-4-[[(1S,4S,5R,8S,9R,13R)-1,5,9-trimethyl-11,14,15,16-tetraoxatetracyclo[10.3.1.04,13.08,13]hexadecan-10-yl]oxy]butanoic acid	LSM-4916	artesunate	Unknown	Unknown	unknown		No		67.35		25.93	99.3	12.24	-10.15	83.66	46.23	74.1	67.61	83.76
Pharmakon1600-01300027	BRD-A48570745	LINCSCP_107802	AZSNMRSAGSSBNP-ONDMGMIHSA-N	45114068	No result	CCC(C)[C@H]1O[C@]2(CC[C@@H]1C)C[C@@H]1C[C@@H](C\C=C(C)\[C@@H](OC3C[C@H](OC)C(O[C@H]4C[C@H](OC)[C@@H](O)[C@H](C)O4)[C@H](C)O3)[C@@H](C)\C=C\C=C3/CO[C@@H]4[C@H](O)C(C)=C[C@@H](C(=O)O1)[C@]34O)O2	CCC(C)[C@H]1O[C@]2(CC[C@@H]1C)C[C@@H]1C[C@@H](C/C=C(\C)[C@@H](OC3C[C@H](OC)C(O[C@H]4C[C@H](OC)[C@@H](O)[C@H](C)O4)[C@H](C)O3)[C@@H](C)/C=C/C=C3\CO[C@@H]4[C@H](O)C(C)=CC(C(=O)O1)[C@]34O)O2	Pharmakon1600-01300027	ivermectin	ivermectin	CHRNA7	Acetylcholine	CHRNA7, GABRB3, GLRA3, P2RX7		No		81.3		51.26	68.12	43.42	0	83.69	37.54	95.08	80.67	-90.92
N-[(2R)-2,3-Dihydroxypropoxy]-3,4-difluoro-2-[(2-fluoro-4-iodophenyl)amino]benzamide	BRD-A50454580	LINCSCP_16588	SUDAHWBOROXANE-SECBINFHSA-N	9826528	CHEMBL507361	OCC(O)CONC(=O)c1ccc(F)c(F)c1Nc1ccc(I)cc1F	O=C(NOCC(O)CO)c1ccc(F)c(F)c1Nc1ccc(I)cc1F	N-[(2R)-2,3-Dihydroxypropoxy]-3,4-difluoro-2-[(2-fluoro-4-iodophenyl)amino]benzamide	PD-0325901	BRD-K49865102	MAP2K1	MAPK/MEK/ERK	MAP2K1, MAP2K2		Yes	kinase	89.75		-49.43	10.22	92.88	-53.88	0	0	88.24	80.64	95.5
Ingenol	BRD-A52650764	LINCSCP_10303	VEBVPUXQAPLADL-POYOOMFHSA-N	442042	CHEMBL2165402	CC1CC2C(C3C=C(COC(=O)c4ccccc4)C(O)C4(O)C(OC(=O)c5ccccc5)C(C)=CC14C3=O)C2(C)C	CC1=CC23C(=O)C(=CC(COC(=O)c4ccccc4)C(O)C2(O)C1OC(=O)c1ccccc1)C1C(CC3C)C1(C)C	Ingenol	ingenol	ingenol	Unknown	Inflammatory	Unknown	Induction of IL8, Induction of TNFa	No		-95.76		-73.74	98.77	-75.82	-17.87	-95.25	-96.27	-94.47	-95.98	-82.62
Orphenadrine	BRD-A53576514	LINCSCP_106686	QVYRGXJJSLMXQH-UHFFFAOYSA-N	4601	CHEMBL900	CN(C)CCOC(c1ccccc1)c1ccccc1C	Cc1ccccc1C(OCCN(C)C)c1ccccc1	Orphenadrine	orphenadrine	orphenadrine	CYP2B6	Histamine	CYP2B6, GRIN1, GRIN2D, GRIN3A, GRIN3B, HRH1, SCN10A, SLC6A2	"H1 receptors participates in the leptin-dependent inhibition of food intake" PMID: 31295465 H3 receptor ligands and obesity	No		80.5		89.18	39.71	0	-27.62	-34.39	96.47	79.18	0	88.71
3-(7-(2,4-Dimethoxyphenyl)-2,3,6,7-tetrahydro-(1,4)thiazepin-5-yl)-4-hydroxy-6-methylpyran-2-one	BRD-A54927599	LINCSCP_11378	NHFIAAAMCYVRIW-UHFFFAOYSA-N	135400439	CHEMBL246957	COc1ccc(C2CC(=NCCS2)c2c(O)cc(C)oc2=O)c(OC)c1	COc1ccc(C2CC(c3c(O)cc(C)oc3=O)=NCCS2)c(OC)c1	3-(7-(2,4-Dimethoxyphenyl)-2,3,6,7-tetrahydro-(1,4)thiazepin-5-yl)-4-hydroxy-6-methylpyran-2-one	KF-38789	KF-38789	SELP	Inflammatory	SELP		No		-89.99		18.01	-21.87	0	-25.47	-95.71	-50.67	-93.22	-67.41	-84.87
Vinblastin sulfate	BRD-A55594068	LINCSCP_11135	JXLYSJRDGCGARV-CUGARIAGSA-N	6710780	No result	CC[C@]1(O)CC2CN(C1)CCc1c([nH]c3ccccc13)[C@@](C2)(C(=O)OC)c1cc2c(cc1OC)N(C)[C@@H]1[C@]22CCN3CC=C[C@](CC)([C@@H]23)[C@@H](OC(C)=O)[C@]1(O)C(=O)OC	CC[C@]1(O)CC2CN(CCc3c([nH]c4ccccc34)[C@@](C(=O)OC)(c3cc4c(cc3OC)N(C)[C@H]3[C@@](O)(C(=O)OC)[C@H](OC(C)=O)[C@]5(CC)C=CCN6CC[C@]43[C@@H]65)C2)C1	Vinblastin sulfate	vinblastine	vinblastine	TUBB	Tubulin inhibitor	TUBB, JUN, TUBA1A, TUBD1, TUBE1, TUBG1		No		-96.23		-37.2	35.74	-99.35	-98.22	-95.6	-90.16	-98.98	-49.86	-83.95
1-(5-Isoquinolinesulfonyl)-2-methylpiperazine	BRD-A55756846	LINCSCP_16590	BDVFVCGFMNCYPV-UHFFFAOYSA-N	3542	CHEMBL323556	CC1CNCCN1S(=O)(=O)c2cccc3cnccc23	CC1CNCCN1S(=O)(=O)c1cccc2cnccc12	1-(5-Isoquinolinesulfonyl)-2-methylpiperazine	H-7	H-7	ATAD5	Unknown	PKIA, PRKACA, PRKAR1A, ATAD5		No	kinase	-77.03		37.63	39.39	0	-79.94	0	-89.77	-68.49	0	-99.8
Thiorphan	BRD-A56012032	LINCSCP_11499	LJJKNPQAGWVLDQ-UHFFFAOYSA-N	3132	CHEMBL10247	OC(=O)CNC(=O)C(CS)Cc1ccccc1	O=C(O)CNC(=O)C(CS)Cc1ccccc1	Thiorphan	thiorphan	thiorphan	MME	Protease	MME		No		-77.84		3.02	-41.77	-53.07	-95.32	-89.41	-85.91	-90.69	0	-36.2
Zileuton	BRD-A56359832	LINCSCP_103609	MWLSOWXNZPKENC-UHFFFAOYSA-N	60490	CHEMBL93	CC(N(O)C(N)=O)c1cc2ccccc2s1	CC(c1cc2ccccc2s1)N(O)C(N)=O	Zileuton	zileuton	zileuton	ALOX5 (5LO)	Leukotriene inhibitor	ALOX5 (5LO)	PMID: 32393635 Leukotrienes contribute to IR; In ob/ob mice, once daily oral administration of zileuton (50, 100 mg/kg) for 5 weeks improved insulin resistance PMID: 28694473 PMID: 22688342	No		74.79	-74.01	92.9	97.75	3.48	-24.77	-46.25	-21.85	62.57	6.13	69.09
Bromocriptine	BRD-A60274948	LINCSCP_227	OZVBMTJYIDMWIL-AYFBDAFISA-N	31101	CHEMBL493	CC(C)C[C@@H]1N2C(=O)[C@](NC(=O)[C@H]3CN(C)C4Cc5c(Br)[nH]c6cccc(C4=C3)c56)(O[C@@]2(O)[C@@H]7CCCN7C1=O)C(C)C	CC(C)CC1C(=O)N2CCC[C@H]2[C@]2(O)O[C@](NC(=O)C3=CC4c5cccc6[nH]c(Br)c(c56)CC4N(C)C3)(C(C)C)C(=O)N12	Bromocriptine	bromocriptine	bromocriptine	DRD2	Dopamine	DRD2, ADRA2A, ADRA2B, ADRA2C, DRD1, DRD3, DRD4, DRD5, HTR1A, HTR1B, HTR1D, HTR2A, HTR2B, HTR2C, ADRA1A, ADRA1B, ADRA1D, HTR6, HTR7, PRL		No		-86.54		0	-81.06	-30.26	-99.59	0	-68.9	-76.04	-92.59	NaN
Vincristine	BRD-A60414806	LINCSCP_11137	OGWKCGZFUXNPDA-XQKSVPLYSA-N	5978	CHEMBL90555	CC[C@]1(O)CC2CN(C1)CCc1c([nH]c3ccccc13)[C@@](C2)(C(=O)OC)c1cc2c(cc1OC)N(C=O)[C@@H]1[C@]22CCN3CC=C[C@](CC)([C@@H]23)[C@@H](OC(C)=O)[C@]1(O)C(=O)OC	CC[C@]1(O)CC2CN(CCc3c([nH]c4ccccc34)[C@@](C(=O)OC)(c3cc4c(cc3OC)N(C=O)[C@H]3[C@@](O)(C(=O)OC)[C@H](OC(C)=O)[C@]5(CC)C=CCN6CC[C@]43[C@@H]65)C2)C1	Vincristine	vincristine	vincristine	TUBB	Tubulin inhibitor	TUBB, TUBA4A		No		-96.99		-97.92	-52.87	-62.27	-46.43	-93.36	-64.28	-98.99	-49.83	-97.69
[4-[2-[(16E,24E,26E,28E)-1,18-Dihydroxy-19,30-dimethoxy-15,17,21,23,29,35-hexamethyl-2,3,10,14,20-pentaoxo-11,36-dioxa-4-azatricyclo[30.3.1.04,9]hexatriaconta-16,24,26,28-tetraen-12-yl]propyl]-2-methoxycyclohexyl] 3-hydroxy-2-(hydroxymethyl)-2-methylpropanoate	BRD-A62025033	LINCSCP_10305	CBPNZQVSJQDFBE-WEDGMEQVSA-N	6440033	No result	COC1CC(CC(C)C2CC(=O)C(C)\C=C(C)\C(O)C(OC)C(=O)C(C)CC(C)\C=C\C=C\C=C(C)\C(CC3CCC(C)C(O)(O3)C(=O)C(=O)N3CCCCC3C(=O)O2)OC)CCC1OC(=O)C(C)(CO)CO	COC1CC2CCC(C)C(O)(O2)C(=O)C(=O)N2CCCCC2C(=O)OC(C(C)CC2CCC(OC(=O)C(C)(CO)CO)C(OC)C2)CC(=O)C(C)=CC(C)C(O)C(OC)C(=O)C(C)CC(C)/C=C/C=C/C=C/1C	[4-[2-[(16E,24E,26E,28E)-1,18-Dihydroxy-19,30-dimethoxy-15,17,21,23,29,35-hexamethyl-2,3,10,14,20-pentaoxo-11,36-dioxa-4-azatricyclo[30.3.1.04,9]hexatriaconta-16,24,26,28-tetraen-12-yl]propyl]-2-methoxycyclohexyl] 3-hydroxy-2-(hydroxymethyl)-2-methylpropanoate	SCHEMBL6851809	SCHEMBL6851809	MTOR	MTOR	Probably MTOR; Temsirolimus related	Cmpd is related to Temsirolimus	No	kinase	81.05		97.96	59.97	58.45	46.55	67.5	69.38	76.09	93.08	-79.09
[6-Acetyloxy-4-butanoyloxy-3,3a-dihydroxy-3,6,9-trimethyl-8-[(E)-2-methylbut-2-enoyl]oxy-2-oxo-4,5,6a,7,8,9b-hexahydroazuleno[4,5-b]furan-7-yl] octanoate	BRD-A62809825	LINCSCP_12685	IXFPJGBNCFXKPI-YBFXNURJSA-N	5353993	No result	CCCCCCCC(=O)OC1C(OC(=O)/C(=C/C)/C)C(=C2C3OC(=O)C(C)(O)C3(O)C(CC(C)(OC(=O)C)C12)OC(=O)CCC)C	CC=C(C)C(=O)OC1C(C)=C2C(C1OC(=O)CCCCCCC)C(C)(OC(C)=O)CC(OC(=O)CCC)C1(O)C2OC(=O)C1(C)O	[6-Acetyloxy-4-butanoyloxy-3,3a-dihydroxy-3,6,9-trimethyl-8-[(E)-2-methylbut-2-enoyl]oxy-2-oxo-4,5,6a,7,8,9b-hexahydroazuleno[4,5-b]furan-7-yl] octanoate	thapsigargin	thapsigargin	ATP2A1	ATPase inhibitor	ATP2A1		No		-63.19	-83.92	-79.51	-64.7	0	42.65	63.24	0	-92.32	66.34	-98.99
(1S,6R)-3-Methyl-7-oxabicyclo[4.1.0]heptane-2,4,5-trione	BRD-A64228451	LINCSCP_13119	NYFMSQHOGRWGFD-OOEDRKFMSA-N	44483234	No result	CC1C(=O)[C@H]2O[C@H]2C(=O)C1=O	Cc1c(O)c(O)c2c(c1O)O2	(1S,6R)-3-Methyl-7-oxabicyclo[4.1.0]heptane-2,4,5-trione	Q27166269	44483234	Unknown	Unknown			No	kinase	-78.17		-19.66	-33.51	-96	-93.31	0	94.26	-48.14	-67.71	-92.24
Cimaterol	BRD-A65440446	LINCSCP_237	BUXRLJCGHZZYNE-UHFFFAOYSA-N	2755	CHEMBL1374751	CC(C)NCC(O)c1ccc(N)c(c1)C#N	CC(C)NCC(O)c1ccc(N)c(C#N)c1	Cimaterol	cimaterol	cimaterol	TSHR	Thyroid Agonist	TSHR, ADRB1, ESRRA		No		66		78.45	23.26	45.05	-89.67	0	80.23	6.31	81.32	NaN
Azelastine	BRD-A68888262	LINCSCP_125920	MBUVEWMHONZEQD-UHFFFAOYSA-N	2267	CHEMBL639	CN1CCCC(CC1)n1nc(Cc2ccc(Cl)cc2)c2ccccc2c1=O	CN1CCCC(n2nc(Cc3ccc(Cl)cc3)c3ccccc3c2=O)CC1	Azelastine	azelastine	azelastine	HRH1	Histamine Antagonist	HRH1, CYP2C19		No		-71.4		-76.91	-15.45	41.34	0	-96.46	NaN	-44.66	-96.33	NaN
Pharmakon1600-01500676	BRD-A68930007	LINCSCP_11140	LPMXVESGRSUGHW-XPXORLBYSA-N	12420	No result	C[C@@H]1O[C@@H](O[C@H]2C[C@@H](O)[C@]3(CO)C4[C@H](O)C[C@]5(C)[C@H](CC[C@]5(O)C4CC[C@]3(O)C2)C2=CC(=O)OC2)[C@H](O)[C@H](O)[C@H]1O	C[C@@H]1O[C@@H](O[C@H]2C[C@@H](O)[C@]3(CO)C4C(CC[C@]3(O)C2)[C@@]2(O)CCC(c3coc(O)c3)[C@@]2(C)C[C@H]4O)[C@H](O)[C@H](O)[C@H]1O	Pharmakon1600-01500676	ouabain	ouabain	ATP1A1	ATPase	ATP1A1, ATP1A2, ATP1A3, ATP1A4, ATP1B1, ATP1B2, ATP1B3, ATP1B4, FXYD2		No	kinase	70.8	88.16	73.26	86.03	40.48	50.6	0	63.2	34.08	-71.25	80.85
DL-Carbidopa	BRD-A69512159	LINCSCP_13066	TZFNLOMSOLWIDK-UHFFFAOYSA-N	2563	CHEMBL1179357	CC(Cc1ccc(O)c(O)c1)(NN)C(=O)O	CC(Cc1ccc(O)c(O)c1)(NN)C(=O)O	DL-Carbidopa	carbidopa	carbidopa	DDC	Metabolic	DDC		No		71.49	87.7	0	0	58.29	-43.75	71.24	34.75	0	61.9	96.69
9,9,16,16-Tetramethyl-14-oxido-10-oxa-23,25-diaza-14-azoniaheptacyclo[17.5.2.01,17.03,15.04,13.06,11.019,23]hexacosa-2,4(13),5,7,11,14-hexaene-24,26-dione	BRD-A70731303	LINCSCP_17288	CRUOLOXVRBAOST-UHFFFAOYSA-N	73707610	No result	CC1(C)Oc2cc3c(cc2C=C1)C1=CC24NC(=O)C5(CCCN5C2=O)CC4C(C)(C)C1=[N+]3[O-]	CC1(C)C=Cc2cc3c(cc2O1)[N+]([O-])=C1C3=CC23NC(=O)C4(CCCN4C2=O)CC3C1(C)C	9,9,16,16-Tetramethyl-14-oxido-10-oxa-23,25-diaza-14-azoniaheptacyclo[17.5.2.01,17.03,15.04,13.06,11.019,23]hexacosa-2,4(13),5,7,11,14-hexaene-24,26-dione	avrainvillamide-analog-5	avrainvillamide-analog-5	NPM1	Nucleophosmin inhibitor	NPM1		No		-72.86		-78.75	NaN	69.23	-82.54	-59.77	-22.35	33.86	-71.36	-30.85
Chembl3039191	BRD-A75144621	LINCSCP_16931	LTMHDMANZUZIPE-QVYPYPLASA-N	5702042	No result	C[C@H]1O[C@H](C[C@H](O)[C@@H]1O)O[C@H]1[C@@H](O)C[C@H](O[C@H]2[C@@H](O)C[C@H](O[C@H]3CC[C@@]4(C)[C@H](CC[C@@H]5[C@@H]4C[C@@H](O)[C@]4(C)C(CC[C@]54O)C4=CC(=O)OC4)C3)O[C@@H]2C)O[C@@H]1C	C[C@H]1O[C@@H](O[C@H]2[C@@H](O)C[C@H](O[C@H]3[C@@H](O)C[C@H](O[C@H]4CC[C@]5(C)[C@H]6C[C@@H](O)[C@]7(C)C(c8coc(O)c8)CC[C@]7(O)[C@@H]6CC[C@@H]5C4)O[C@@H]3C)O[C@@H]2C)C[C@H](O)[C@@H]1O	Chembl3039191	digoxin	BRD-A94756469	ATP1A1	ATPase	ATP1A1, ABCB1, RORC, SLCO1B3		No	kinase	82.06		82.87	69.26	58.03	77.05	-41.16	76.25	-77.02	-76.37	NaN
Xolegel	BRD-A76019558	LINCSCP_180711	XMAYWYJOQHXEEK-OZXSUGGESA-N	456201	CHEMBL75	CC(=O)N1CCN(CC1)c2ccc(OCC3COC(Cn4ccnc4)(O3)c5ccc(Cl)cc5Cl)cc2	CC(=O)N1CCN(c2ccc(OCC3COC(Cn4ccnc4)(c4ccc(Cl)cc4Cl)O3)cc2)CC1	Xolegel	ketoconazole	BRD-K29113274	AR	Steriod	AR, CYP19A1, CYP21A2, CYP2C19, CYP3A5, CYP3A7, KCNA10	PMID: 27789139 2016 Ketoconazole sulfonamide analogs for MS; "suppressing steroidogenesis in Cushing's disease" PMID: 26858837. https://clinicaltrials.gov/ct2/show/NCT00501397. Cheng et al PMID: 22589709 identified that Ketoconazole has ERB activity 800nM	No		89.65		29.03	0	87.82	90.07	0	0	93.91	89.48	NaN
Vincristine	BRD-A76528577	LINCSCP_11248	OGWKCGZFUXNPDA-XQKSVPLYSA-N	5978	CHEMBL90555	CCC1(O)CC2CN(C1)CCc3c([nH]c4ccccc34)C(C2)(C(=O)OC)c5cc6c(cc5OC)N(C=O)C7C86CCN9CC=CC(CC)(C98)C(C(=O)OC)C7(O)C(=O)OC	CCC1(O)CC2CN(CCc3c([nH]c4ccccc34)C(C(=O)OC)(c3cc4c(cc3OC)N(C=O)C3C(O)(C(=O)OC)C(C(=O)OC)C5(CC)C=CCN6CCC43C65)C2)C1	Vincristine	vincristine	vincristine	TUBB	Tubulin inhibitor	TUBB, TUBA4A		No		-93.87		-91.6	-87.2	-80.93	-91.48	-86.15	-87.63	-95.45	-49.46	-47.49
Rapamycin/Sirolimus	BRD-A79768653	LINCSCP_100082	QFJCIRLUMZQUOT-KADBNGAOSA-N	21944094	No result	COC1CC(CC(C)C2CC(=O)C(C)\C=C(C)\C(O)C(OC)C(=O)C(C)CC(C)\C=C\C=C\C=C(C)\C(CC3CCC(C)C(O)(O3)C(=O)C(=O)N3CCCCC3C(=O)O2)OC)CCC1O	COC1CC2CCC(C)C(O)(O2)C(=O)C(=O)N2CCCCC2C(=O)OC(C(C)CC2CCC(O)C(OC)C2)CC(=O)C(C)=CC(C)C(O)C(OC)C(=O)C(C)CC(C)/C=C/C=C/C=C/1C	Rapamycin/Sirolimus	sirolimus	BRD-K89626439	MTOR	MTOR	<1nM MTOR, <1nM FKBP1A		No	kinase	78.03		55.12	87.94	44.86	82.5	52.76	81.53	94.26	94.37	0
3-Oxalomalic acid	BRD-A80574334	LINCSCP_20383	YILAUJBAPQXZGM-UHFFFAOYSA-N	439620	No result	OC(C(C(O)=O)C(=O)C(O)=O)C(O)=O	O=C(O)C(=O)C(C(=O)C(=O)O)C(O)O	3-Oxalomalic acid	oxalomalic-acid	oxalomalic-acid	ACO1	Metabolic	ACO1, IDH1		No		-74.15		0	-20.64	40.06	21.6	-77.88	-95.29	-70.74	-30.97	-81.02
Glyceryl palmitate	BRD-A80928489	LINCSCP_262768	QHZLMUACJMDIAE-UHFFFAOYSA-N	14900	CHEMBL1078140	CCCCCCCCCCCCCCCC(=O)OCC(O)CO	CCCCCCCCCCCCCCCC(=O)OCC(O)CO	Glyceryl palmitate	1-monopalmitin	1-monopalmitin	ABCB1	Inflammatory	ABCB1		No		-81.02		NaN	NaN	78.15	-60.74	NaN	NaN	-61.7	-88.85	-94.87
(1R,4E,5'R,6R,6'R,7S,8R,10S,11S,12R,14S,15R,16S,18E,20E,22S,25S,27R,28R,29S)-22-Ethyl-7,11,14,15-tetrahydroxy-6'-[(2R)-2-hydroxypropyl]-5',6,8,10,12,14,16,28,29-nonamethylspiro[2,26-dioxabicyclo[23.3.1]nonacosa-4,18,20-triene-27,2'-oxane]-3,9,13-trione	BRD-A81541225	LINCSCP_10311	MNULEGDCPYONBU-JBMMDCLPSA-N	73707429	No result	CCC1CCC2OC3(CC[C@@H](C)C(C[C@H](C)O)O3)[C@H](C)C(OC(=O)\C=C\[C@@H](C)[C@H](O)[C@@H](C)C(=O)[C@H](C)[C@@H](O)[C@H](C)C(=O)[C@@](C)(O)[C@H](O)[C@@H](C)C\C=C\C=C\1)[C@H]2C	CCC1/C=C/C=C/C[C@H](C)[C@@H](O)[C@](C)(O)C(=O)C(C)[C@H](O)C(C)C(=O)C(C)[C@@H](O)C(C)=CCC(=O)OC2[C@@H](C)C(CC1)OC1(CC[C@@H](C)C(C[C@H](C)O)O1)[C@@H]2C	(1R,4E,5'R,6R,6'R,7S,8R,10S,11S,12R,14S,15R,16S,18E,20E,22S,25S,27R,28R,29S)-22-Ethyl-7,11,14,15-tetrahydroxy-6'-[(2R)-2-hydroxypropyl]-5',6,8,10,12,14,16,28,29-nonamethylspiro[2,26-dioxabicyclo[23.3.1]nonacosa-4,18,20-triene-27,2'-oxane]-3,9,13-trione	oligomycin-a	BRD-K74133369	ATP5A1	ATPase	ATP5A1	inhibitor of ATP synthase - mimicking Metformin? Metforming scores 0 for IR, but 80 for Linear Aging	No		89.65		30.67	93.08	94.5	73.11	51.97	66.56	52.77	89.81	77.27
Brasilin	BRD-A83326220	LINCSCP_14664	UWHUTZOCTZJUKC-UHFFFAOYSA-N	222515	CHEMBL1370456	Oc1ccc2C3c4cc(O)c(O)cc4CC3(O)COc2c1	Oc1ccc2c(c1)OCC1(O)Cc3cc(O)c(O)cc3C21	Brasilin	brazilin	brazilin	RORC	Anti-Inflammatory	RORC, ALOX15	Rorc - RAR-related orphan receptor gamma, nitric oxide production inhibitor, nitric oxide synthase expression inhibitor, telomerase inhibitor	No	kinase	74.18		24.37	30.79	77.79	0	93.12	64.53	51.96	55.52	94.4
Calpeptin	BRD-A84045418	LINCSCP_10313	PGGUOGKHUUUWAF-ROUUACIJSA-N	73364	CHEMBL92708	CCCCC(NC(=O)C(CC(C)C)NC(=O)OCc1ccccc1)C=O	CCCCC(C=O)NC(=O)C(CC(C)C)NC(=O)OCc1ccccc1	Calpeptin	calpeptin	BRD-K26134695	CTSK, CAPN1	Proteinase inhibitor	CTSK, CAPN1	"proteasomal dysfunction and impaired proteostasis in adipocytes, resulting from protein oxidation and/or misfolding, constitute major pathogenic mechanisms in the development of IR in obesity" PMID: 25714483	No		95.18		82.53	81.43	98.87	91.88	89.68	92.9	97.73	72.57	0
(Z)-7-[(2R)-3,5-Dihydroxy-2-[(E)-3-hydroxy-5-phenylpent-1-enyl]cyclopentyl]-N-ethylhept-5-enamide	BRD-A87848830	LINCSCP_227869	AQOKCDNYWBIDND-NFTGKOCPSA-N	46780805	No result	CCNC(=O)CCC\C=C/CC1C(O)CC(O)[C@@H]1\C=C\C(O)CCc1ccccc1	CCNC(=O)CCC/C=C\CC1C(O)CC(O)[C@@H]1/C=C/C(O)CCc1ccccc1	(Z)-7-[(2R)-3,5-Dihydroxy-2-[(E)-3-hydroxy-5-phenylpent-1-enyl]cyclopentyl]-N-ethylhept-5-enamide	bimatoprost	bimatoprost	PTGFR, AKR1C3	Inflammatory	PTGFR, AKR1C3, PTGER1, PTGER3		No		-86.15		-48.28	-74.26	-94.79	0	-86.15	-78.51	-43.36	-20.55	NaN
Dexamethasone-21-acetate	BRD-A93424738	LINCSCP_110935	AKUJBENLRBOFTD-HIBZCRSPSA-N	5702036	CHEMBL384467	C[C@@H]1CC2C3CCC4=CC(=O)C=C[C@]4(C)[C@@]3(F)[C@@H](O)C[C@]2(C)[C@@]1(O)C(=O)COC(C)=O	CC(=O)OCC(=O)[C@@]1(O)[C@H](C)CC2C3CC=C4CC(=O)C=C[C@]4(C)[C@@]3(F)[C@@H](O)C[C@@]21C	Dexamethasone-21-acetate	dexamethasone	dexamethasone-acetate	Unknown	Glucocorticoid	ANXA1, CYP3A4, CYP3A5, NOS2, NR0B1, NR3C1, NR3C2	anti-inflammatory	No		73.32		78.46	68.96	-40.89	0	34.09	0	93.03	94.75	33.58
Chembl3039191	BRD-A94756469	LINCSCP_110557	LTMHDMANZUZIPE-QVYPYPLASA-N	5702042	No result	C[C@H]1O[C@H](C[C@H](O)[C@@H]1O)O[C@H]1[C@@H](O)C[C@H](O[C@H]2[C@@H](O)C[C@H](O[C@H]3CC[C@@]4(C)[C@H](CCC5C4C[C@@H](O)[C@]4(C)[C@H](CC[C@]54O)C4=CC(=O)OC4)C3)O[C@@H]2C)O[C@@H]1C	C[C@H]1O[C@@H](O[C@H]2[C@@H](O)C[C@H](O[C@H]3[C@@H](O)C[C@H](O[C@H]4CC[C@]5(C)C6C[C@@H](O)[C@]7(C)C(c8coc(O)c8)CC[C@]7(O)C6CC[C@@H]5C4)O[C@@H]3C)O[C@@H]2C)C[C@H](O)[C@@H]1O	Chembl3039191	digoxin	digoxin	ATP1A1	ATPase	ATP1A1, ABCB1, RORC, SLCO1B3		No	kinase	76.14		86.25	48.1	91.11	94.56	0	25.97	-59.98	-78.91	17.08
(8S,13R,17S)-13,17-Diethyl-17-hydroxy-1,2,6,7,8,14,15,16-octahydrocyclopenta[a]phenanthren-3-one	BRD-A94793051	LINCSCP_16936	OXHNQTSIKGHVBH-WVVQBRDUSA-N	73707430	No result	CC[C@]1(O)CCC2[C@@H]3CCC4=CC(=O)CCC4=C3C=C[C@@]12CC	CC[C@]1(O)CCC2C3=C(C=C[C@]21CC)C1=C(CC3)CC(=O)CC1	(8S,13R,17S)-13,17-Diethyl-17-hydroxy-1,2,6,7,8,14,15,16-octahydrocyclopenta[a]phenanthren-3-one	R2323	gestrinone	PGR	Steriod	PGR, AR, ESR1	Non RCT indicating improved glucose tolerance PMID: 249676	No		75.78		23.47	-80.22	0	81.9	99.75	69.83	47.45	63.38	NaN
Deltaline	BRD-A99177642	LINCSCP_11392	DTTPWCNKTMQMTE-DZZCPBQSSA-N	441728	CHEMBL480500	CCN1C[C@]2(C)CC[C@H](OC)[C@@]34[C@@H]2[C@H](OC(=O)C)[C@@]5(OCO[C@]65C[C@H](OC)[C@H]7C[C@]4(O)[C@@H]6[C@H]7OC)C13	CCN1C[C@]2(C)CC[C@H](OC)[C@@]34C1[C@]1(OCO[C@@]15C[C@H](OC)[C@H]1C[C@]3(O)[C@@H]5[C@H]1OC)[C@@H](OC(C)=O)[C@H]24	Deltaline	deltaline	deltaline	CHRNA7	Acetylcholine	CHRNA7	Antagonist activity at muscarinic receptors. 6 gene GRS score including CHRM3 associated with IR PMID: 30343302. In Beta cells CHRM3 regulates Glucose-stimulated insulin secretion (agonism) PMID: 32044662. SGAs with the highest clinical incidence of diabetes side-effects, are potent M3R antagonists - PMID: 24114587	No		63.83		74.99	99.93	-55.4	-95.67	0	89.32	0	63.72	0
n/a	BRD-K00313977	LINCSCP_15933	No result	No result	No result	CC(C)N1Cc2sc(NC(C)=O)c(-c3nc4ccccc4s3)c2C1	CC(=O)Nc1sc2c(c1-c1nc3ccccc3s1)CN(C(C)C)C2	n/a	BRD-K00313977	BRD-K00313977	APEX1	Unknown	APEX1		No		-79.45		-50.23	-71.81	-98.08	27.36	-75.16	27.34	0	-85.37	0
8-(4-Dibenzothienyl)-2-(4-morpholinyl)-4H-1-benzopyran-4-one	BRD-K00337317	LINCSCP_10996	JAMULYFATHSZJM-UHFFFAOYSA-N	11327430	CHEMBL188678	O=c1cc(oc2c(cccc12)-c1cccc2c3ccccc3sc12)N1CCOCC1	O=c1cc(N2CCOCC2)oc2c(-c3cccc4c3sc3ccccc34)cccc12	8-(4-Dibenzothienyl)-2-(4-morpholinyl)-4H-1-benzopyran-4-one	NU-7441	NU-7441	PRKDC	DNA	PRKDC, ABCB1		Yes	kinase	71.52	89.55	-54.51	-53.07	0	77.8	0	76.62	0	91.49	99.69
6-Chrysenamine	BRD-K00656370	LINCSCP_10689	KIVUHCNVDWYUNP-UHFFFAOYSA-N	17534	CHEMBL313154	Nc1cc2c3ccccc3ccc2c4ccccc14	Nc1cc2c3ccccc3ccc2c2ccccc12	6-Chrysenamine	6-aminochrysene	6-aminochrysene	HPRT1	DNA	HPRT1	carcinogen; anti-tumour toxin	No		75.37		80.06	99.65	80.79	0	43.56	85.1	16.78	82.57	NaN
Tyrphostin AG 112	BRD-K01192156	LINCSCP_103566	DXVJRTIPBNBLLB-BJMVGYQFSA-N	5328804	CHEMBL76589	NC(=C(C#N)C#N)/C(=C/c1ccc(O)cc1)/C#N	N#CC(=Cc1ccc(O)cc1)C(=N)C(C#N)C#N	Tyrphostin AG 112	tyrphostin-AG-112	tyrphostin-AG-112	EGFR	Tyrosine kinase Receptor	100nM EGFR	Cell membrane (EGF signalling) and Nuclear role (DNA-PK) IR and EGFR activation and negative cooperativity PMID: 32297376. soluble EGFR described as a T2DM and hepatic IR biomarker: PMID: 33005239. hyperinsulinemia causes resistance to EGFR inhibitor (gefitinib) PMID: 32963612. An EGRF ligand is amphiregulin (induced by High fat feeding) PMID: 32135161. Pro inflammatory RHBDF2 (iRHOM2) promotes i…	No	Kinase	86.16	-73.26	-37.01	77.22	40.14	19.4	78.17	-36.78	83.8	80.88	97.97
Lrrk2-IN-1	BRD-K01436366	LINCSCP_100044	IWMCPJZTADUIFX-UHFFFAOYSA-N	46843906	CHEMBL2012582	COc1cc(ccc1Nc1ncc2N(C)C(=O)c3ccccc3N(C)c2n1)C(=O)N1CCC(CC1)N1CCN(C)CC1	COc1cc(C(=O)N2CCC(N3CCN(C)CC3)CC2)ccc1Nc1ncc2c(n1)N(C)c1ccccc1C(=O)N2C	Lrrk2-IN-1	XMD-1150	LRRK2-IN-1	LRRK2	LRRK inhibitor	LRRK2		Yes	kinase	-84.17		-15.99	0	-68.52	83.04	80.75	-97.12	-79.45	-19.62	-83.67
Olaparib	BRD-K02113016	LINCSCP_100484	FDLYAMZZIXQODN-UHFFFAOYSA-N	23725625	CHEMBL521686	Fc1ccc(Cc2n[nH]c(=O)c3ccccc23)cc1C(=O)N1CCN(CC1)C(=O)C1CC1	O=C(c1cc(Cc2n[nH]c(=O)c3ccccc23)ccc1F)N1CCN(C(=O)C2CC2)CC1	Olaparib	olaparib	olaparib	PARP1	PARP inhibitor	PARP1, PARP2, PARP3		No		76.35		28.44	93.68	47.92	0	52.61	74.65	92.33	48.41	0
Panobinostat	BRD-K02130563	LINCSCP_10694	FPOHNWQLNRZRFC-ZHACJKMWSA-N	6918837	CHEMBL483254	Cc1[nH]c2ccccc2c1CCNCc1ccc(\C=C\C(=O)NO)cc1	Cc1[nH]c2ccccc2c1CCNCc1ccc(/C=C/C(O)=NO)cc1	Panobinostat	panobinostat	panobinostat	HDAC1	HDAC inhibitor	HDAC1, HDAC2, HDAC3, HDAC4, HDAC6, HDAC7, HDAC8, HDAC9		No		-72.34		0	-88.9	0	51.63	0	-66	-87.46	-41.01	-84.82
1,1,1-Trifluoro-N-[4-[2-[4-[2-[3-(trifluoromethylsulfonylamino)phenyl]propan-2-yl]phenyl]propan-2-yl]phenyl]methanesulfonamide	BRD-K02581333	LINCSCP_18845	PIZLBWAGTLRMSK-UHFFFAOYSA-N	25035942	No result	CC(C)(c1ccc(NS(=O)(=O)C(F)(F)F)cc1)c2ccc(cc2)C(C)(C)c3cccc(NS(=O)(=O)C(F)(F)F)c3	CC(C)(c1ccc(NS(=O)(=O)C(F)(F)F)cc1)c1ccc(C(C)(C)c2cccc(NS(=O)(=O)C(F)(F)F)c2)cc1	1,1,1-Trifluoro-N-[4-[2-[4-[2-[3-(trifluoromethylsulfonylamino)phenyl]propan-2-yl]phenyl]propan-2-yl]phenyl]methanesulfonamide	protein-tyrosine-phosphatase-inhibitor-IV	protein-tyrosine-phosphatase-inhibitor-IV	PTPN1	Phosphatase	PTPN1, PTPN11		No		-78.97		-31.29	-63.93	-70.53	0	-99.34	-81.37	-72.4	31.39	-17.36
6-Chloro-7-{[2-(morpholin-4-yl)ethyl]amino}quinoline-5,8-dione	BRD-K03109492	LINCSCP_11149	BMKPVDQDJQWBPD-UHFFFAOYSA-N	379077	CHEMBL337173	ClC1=C(NCCN2CCOCC2)C(=O)c2ncccc2C1=O	O=C1C(=NCCN2CCOCC2)C(Cl)C(=O)c2cccnc21	6-Chloro-7-{[2-(morpholin-4-yl)ethyl]amino}quinoline-5,8-dione	NSC-663284	NSC-663284	CDC25A	Phosphatase	CDC25A, CDC25B, CDC25C	phosphatases that activate cyclin-dependent kinase (CDK) complexes	No	kinase	83.37		76.76	-18.3	64.37	-66.98	28.67	0	-81.23	95.14	99.06
Rottlerin	BRD-K03816923	LINCSCP_105410	DEZFNHCVIZBHBI-ZHACJKMWSA-N	5281847	CHEMBL34241	CC(=O)c1c(O)c(C)c(O)c(Cc2c(O)c(C(=O)/C=C/c3ccccc3)c4OC(C)(C)C=Cc4c2O)c1O	CC(=O)c1c(O)c(C)c(O)c(Cc2c(O)c3c(c(C(=O)/C=C/c4ccccc4)c2O)OC(C)(C)C=C3)c1O	Rottlerin	rottlerin	rottlerin	KCNH2	PKC	KCNH2, PRKCD, TGM2		Yes	kinase	74.26		77.98	13.21	17.41	73.43	73.73	0	65.06	49.31	5.06
4-Hydroxytamoxifen	BRD-K04210847	LINCSCP_15025	TXUZVZSFRXZGTL-QPLCGJKRSA-N	449459	CHEMBL489	CC/C(=C(\c1ccc(O)cc1)/c2ccc(OCCN(C)C)cc2)/c3ccccc3	CCC(=C(c1ccc(O)cc1)c1ccc(OCCN(C)C)cc1)c1ccccc1	4-Hydroxytamoxifen	tamoxifen	tamoxifen	ESR1	Steriod	ESR1, ESR2, CYP3A5, EBP, GPER1, PRKCA, PRKCB, PRKCD, PRKCE, PRKCG, PRKCI, PRKCQ, PRKCZ	Blocking ER would be expected to be negative for Insulin action: Tam targets other relevant IR genes	No	kinase	83.14		32.43	60.82	80.93	93.21	94.84	0	31.13	74.45	NaN
4-Acetamido-N-(2-amino-5-thiophen-2-ylphenyl)benzamide	BRD-K04466929	LINCSCP_10022	ABZSPJVXTTUFAA-UHFFFAOYSA-N	6918878	CHEMBL235842	CC(=O)Nc1ccc(cc1)C(=O)Nc2cc(ccc2N)c3cccs3	CC(=O)Nc1ccc(C(=O)Nc2cc(-c3cccs3)ccc2N)cc1	4-Acetamido-N-(2-amino-5-thiophen-2-ylphenyl)benzamide	Merck60	Merck60	HDAC1	HDAC inhibitor	HDAC1, HDAC2		No		-88.3		-45.61	0	-99.41	-97.97	-92.98	0	-30.25	-42.04	-20.86
2-(2-Chloro-4-iodophenylamino)-N-cyclopropylmethoxy-3,4-difluorobenzamide	BRD-K05104363	LINCSCP_104807	GFMMXOIFOQCCGU-UHFFFAOYSA-N	6918454	CHEMBL105442	Fc1ccc(C(=O)NOCC2CC2)c(Nc2ccc(I)cc2Cl)c1F	O=C(NOCC1CC1)c1ccc(F)c(F)c1Nc1ccc(I)cc1Cl	2-(2-Chloro-4-iodophenylamino)-N-cyclopropylmethoxy-3,4-difluorobenzamide	PD-184352	PD-184352	MAP2K1	MAPK/MEK/ERK	MAP2K1, MAP2K2, MAP3K1, MAP3K2		Yes	kinase	86.52		-13.05	-68.84	93.59	-43.95	88.32	20.65	66.47	13.58	92.94
3-(4-(4-Chlorophenyl-4-hydroxypiperidino)methyl)indole	BRD-K05181463	LINCSCP_14207	LLBLNMUONVVVPG-UHFFFAOYSA-N	133633	CHEMBL445102	OC1(CCN(Cc2c[nH]c3ccccc23)CC1)c4ccc(Cl)cc4	OC1(c2ccc(Cl)cc2)CCN(Cc2c[nH]c3ccccc23)CC1	3-(4-(4-Chlorophenyl-4-hydroxypiperidino)methyl)indole	L-741626	L-741626	DRD2	Dopamine	DRD2, DRD3, DRD4, HTR2A, HTR2B		No	kinase	73.79		38.91	52.32	63.71	0	78.37	42.36	-66.25	86.63	84.52
3-(2-Cyanopropan-2-yl)-N-(4-methyl-3-((3-methyl-4-oxo-3,4-dihydroquinazolin-6-yl)amino)phenyl)benzamide	BRD-K05804044	LINCSCP_100162	ZGBGPEDJXCYQPH-UHFFFAOYSA-N	11676786	CHEMBL2144069	Cc1ccc(NC(=O)c2cccc(c2)C(C)(C)C#N)cc1Nc1ccc2ncn(C)c(=O)c2c1	Cc1ccc(NC(=O)c2cccc(C(C)(C)C#N)c2)cc1Nc1ccc2ncn(C)c(=O)c2c1	3-(2-Cyanopropan-2-yl)-N-(4-methyl-3-((3-methyl-4-oxo-3,4-dihydroquinazolin-6-yl)amino)phenyl)benzamide	AZ-628	AZ-628	BRAF	RAF inhibitor	BRAF, RAF1	RAF1 increased in obese IR PMID: 17986714. Interacts with insulin signalling PMID: 32982400. Listed as a AKT1 substrate. Part of RAF to EMK to MAPK cascade (? Where MAPK feedback inhibits RAF). RAF inhibitors can block MAPK signalling but context specific (activate the RAF-MEK-ERK pathway in a RAS-dependent manner,). PMID: 20130578	Yes	kinase	91.03		99.57	0	40.53	-38.96	79.3	78.34	90.79	51.23	91.32
(Z)-5-((4-(Pyridin-4-yl)quinolin-6-yl)methylene)thiazolidine-2,4-dione	BRD-K06750613	LINCSCP_16942	QDITZBLZQQZVEE-YBEGLDIGSA-N	23582824	No result	O=C1NC(=O)\C(S1)=C\c1ccc2nccc(-c3ccncc3)c2c1	O=C1NC(=O)/C(=C/c2ccc3nccc(-c4ccncc4)c3c2)S1	(Z)-5-((4-(Pyridin-4-yl)quinolin-6-yl)methylene)thiazolidine-2,4-dione	GSK-1059615	GSK-1059615	PIK3CA	PI3K	<1nM CLK2, 2nM TAOK1, 17nM CSNK2A2		No	kinase	73.92	97.82	47.58	94.83	-55.87	48.07	0	0	91.08	60.84	NaN
1,2,3,4,5,6-Hexabromocyclohexane	BRD-K06817181	LINCSCP_23025	QFQZKISCBJKVHI-UHFFFAOYSA-N	74603	CHEMBL444236	BrC1C(Br)C(Br)C(Br)C(Br)C1Br	BrC1C(Br)C(Br)C(Br)C(Br)C1Br	1,2,3,4,5,6-Hexabromocyclohexane	BRD-K06817181	1,2,3,4,5,6-hexabromocyclohexane	JAK2	JAK	JAK2	IL-6 increases phosphorylation of JAK2, an upstream activator of STAT3. PMID: 15151905 activating the JAK-STAT pathway can also activate PI3K/AKT/mTOR signalling	No	kinase	82.39		NaN	NaN	-69.12	0	NaN	NaN	98.89	89.73	38.95
Jatamansin	BRD-K07212038	LINCSCP_13865	RRHCDWLSHIIIIT-NVWZYQMFSA-N	668081	CHEMBL457257	C/C=C(/C)\C(=O)O[C@@H]1Cc2c(OC1(C)C)ccc3ccc(=O)oc23	CC=C(C)C(=O)O[C@@H]1Cc2c(ccc3ccc(=O)oc23)OC1(C)C	Jatamansin	selinidin	selinidin	Unknown	Unknown	Unknown		No		-77.27		-35.72	-84.83	NaN	NaN	-89.15	0	NaN	NaN	NaN
5-(Nonyloxy)tryptamine	BRD-K08219523	LINCSCP_15944	YHSMSRREJYOGQJ-UHFFFAOYSA-N	1797	CHEMBL97450	CCCCCCCCCOc1ccc2[nH]cc(CCN)c2c1	CCCCCCCCCOc1ccc2[nH]cc(CCN)c2c1	5-(Nonyloxy)tryptamine	5-nonyloxytryptamine	5-nonyloxytryptamine	HTR1B	Serotonin	HTR1B, HTR1D		No		73.38		0	80.2	70.79	75.4	66.77	50.56	56.62	34.99	95.05
Irinotecan	BRD-K08547377	LINCSCP_102615	UWKQSNNFCGGAFS-XIFFEERXSA-N	60838	CHEMBL481	CCc1c2Cn3c(cc4c(COC(=O)[C@]4(O)CC)c3=O)-c2nc2ccc(OC(=O)N3CCC(CC3)N3CCCCC3)cc12	CCc1c2c(nc3ccc(OC(=O)N4CCC(N5CCCCC5)CC4)cc13)-c1cc3c(c(=O)n1C2)COC(=O)[C@]3(O)CC	Irinotecan	irinotecan	irinotecan	TOP1	DNA	TOP1, CYP3A5, TOP1MT	irinotecan may synergise with insulin to prevent tumour growth.	No		75.61		90.3	86.37	9.5	0	0	99.66	-41.25	38.64	0
PDK1 inhibitor	BRD-K09186807	LINCSCP_100210	GCWCGSPBENFEPE-VWLOTQADSA-N	49766501	CHEMBL1234429	Fc1ccc(Cn2cccc(C(=O)N[C@@H](COc3ccc4[nH]c(=O)[nH]c4c3)c3ccccc3)c2=O)cc1F	O=C(N[C@@H](COc1ccc2[nH]c(=O)[nH]c2c1)c1ccccc1)c1cccn(Cc2ccc(F)c(F)c2)c1=O	PDK1 inhibitor	KIN001-244	KIN001-244	PDPK1	MTOR	PDPK1	PDK1 inhibitor - AKT pathway	No	kinase	95.89		47.01	99.56	0	24.86	78.28	95.62	99.62	70.48	35.45
8-Epi-15-D2c-IsoP	BRD-K09436313	LINCSCP_191564	BHMBVRSPMRCCGG-SAIQCDIPSA-N	13292831	No result	CCCCC[C@H](O)\C=C\[C@H]1[C@H](C\C=C/CCCC(O)=O)[C@@H](O)CC1=O	CCCCC[C@H](O)C=CC1C(=O)C[C@H](O)[C@H]1C/C=C\CCCC(=O)O	8-Epi-15-D2c-IsoP	prostaglandin	prostaglandin	AKR1C3	Prostanoid receptor antagonist	AKR1C3, PTGDR, PTGDR2, PTGER1, PTGER2, PTGER4, PTGFR		No		-74.67		-72.35	-96.05	0	65.14	-96.21	0	-58.65	0	-82.94
3-[(2,4,6-Trimethoxy-phenyl)-methylene]-indolin-2-one	BRD-K09638361	LINCSCP_11405	JBJYTZXCZDNOJW-JLHYYAGUSA-N	5288600	CHEMBL489156	COc1cc(OC)c(/C=C\2/C(=O)Nc3ccccc23)c(OC)c1	COc1cc(OC)c(/C=C2/C(=O)Nc3ccccc32)c(OC)c1	3-[(2,4,6-Trimethoxy-phenyl)-methylene]-indolin-2-one	IC 261	IC 261	CSNK1E	Casein Kinase	CSNK1E, CSNK1A1, CSNK1D, CSNK1G2		Yes	kinase	-86.44		0	-46.9	0	0	0	-93.66	-90.05	-83.39	-78.23
Benzo[a]pyrene	BRD-K09668667	LINCSCP_13687	FMMWHPNWAFZXNH-UHFFFAOYSA-N	2336	CHEMBL31184	c1ccc2c(c1)cc3ccc4cccc5ccc2c3c45	c1ccc2c(c1)cc1ccc3cccc4ccc2c1c34	Benzo[a]pyrene	benzo(a)pyrene	benzo(a)pyrene	AHR, CYP1A2, 220nM AR, 0.8uM ESR1	Steriod	AHR, CYP1A2, 220nM AR, 0.8uM ESR1	polycyclic aromatic hydrocarbon metabolised by P450 - yield Oxidative and DNA damage response; nM AHR, Metabolized to the DNA intercalating agent benzo(a)pyrene diol epoxide; senses environmental toxins and endogenous ligands	Yes		92.41		83	99.91	NaN	NaN	-45.9	37.59	NaN	NaN	NaN
N-(2-Aminoethyl)isoquinoline-5-sulfonamide	BRD-K09790412	LINCSCP_16614	DCVZSHVZGVWQKV-UHFFFAOYSA-N	3544	CHEMBL344314	NCCNCc1cccc2cnccc12	NCCNCc1cccc2cnccc12	N-(2-Aminoethyl)isoquinoline-5-sulfonamide	H-9	H-9	PRKACA	cAMP	PRKACA	AEIQS	No	kinase	-69.99		0	-97.39	-59.21	74.42	-74	-79.2	0	0	-90.67
Lasalocid	BRD-K10207760	LINCSCP_11521	BBMULGJBVDDDNI-OWKLGTHSSA-N	5360807	CHEMBL145347	CC[C@H]([C@H]1O[C@@](CC)(C[C@@H]1C)[C@H]2CC[C@](O)(CC)[C@H](C)O2)C(=O)[C@@H](C)[C@@H](O)[C@H](C)CCc3ccc(C)c(O)c3C(=O)O	CCC(C(=O)C(C)[C@@H](O)[C@H](C)CCc1ccc(C)c(O)c1C(=O)O)[C@H]1O[C@](CC)([C@H]2CC[C@](O)(CC)[C@H](C)O2)C[C@@H]1C	Lasalocid	lasalocid	lasalocid		Cytotoxic			No		-64.44		0	84.07	-93.59	0	64.11	-41.84	93.73	-84.09	-80.46
Vinorelbine	BRD-K10916986	LINCSCP_11005	GBABOYUKABKIAF-IELIFDKJSA-N	5311497	CHEMBL553025	CCC1=C[C@@H]2C[N@](C1)Cc1c([nH]c3ccccc13)[C@@](C2)(C(=O)OC)c1cc2c(cc1OC)N(C)[C@@H]1[C@]22CCN3CC=C[C@@](CC)([C@@H]23)[C@@H](OC(C)=O)[C@]1(O)C(=O)OC	CCC1=C[C@@H]2CN(C1)Cc1c([nH]c3ccccc13)[C@@](C(=O)OC)(c1cc3c(cc1OC)N(C)[C@H]1[C@@](O)(C(=O)OC)[C@H](OC(C)=O)[C@@]4(CC)C=CCN5CC[C@]31[C@@H]54)C2	Vinorelbine	vinorelbine	vinorelbine	TUBB	Tubulin inhibitor	TUBB		No		-85.19		-77.5	0	0	42.05	0	-59.24	-95.83	-82.24	-99.47
Dactolisib	BRD-K12184916	LINCSCP_101812	JOGKUKXHTYWRGZ-UHFFFAOYSA-N	11977753	CHEMBL1879463	Cn1c2cnc3ccc(cc3c2n(-c2ccc(cc2)C(C)(C)C#N)c1=O)-c1cnc2ccccc2c1	Cn1c(=O)n(-c2ccc(C(C)(C)C#N)cc2)c2c3cc(-c4cnc5ccccc5c4)ccc3ncc21	Dactolisib	NVP-BEZ235	NVP-BEZ235	MTOR	MTOR	2nM MTOR, 2nM PIK3R1, 5nM PIK3CG		Yes	kinase	96.43	96.9	88.7	96.67	99.68	74.88	98.74	93.6	95.51	33.65	0
Fedratinib	BRD-K12502280	LINCSCP_10343	JOOXLOJCABQBSG-UHFFFAOYSA-N	16722836	CHEMBL1287853	Cc1cnc(Nc2ccc(OCCN3CCCC3)cc2)nc1Nc1cccc(c1)S(=O)(=O)NC(C)(C)C	Cc1cnc(Nc2ccc(OCCN3CCCC3)cc2)nc1Nc1cccc(S(=O)(=O)NC(C)(C)C)c1	Fedratinib	TG-101348	TG-101348	JAK2	JAK	JAK2, FLT3, BRD4, JAK1, JAK3, RET, TYK2	IL-6 increases phosphorylation of JAK2, an upstream activator of STAT3. PMID: 15151905 activating the JAK-STAT pathway can also activate PI3K/AKT/mTOR signalling	Yes	kinase	74.57		71.82	-28.07	0	94.61	91.36	0	0	62.31	0
Nocodazole	BRD-K12539581	LINCSCP_101	KYRVNWMVYQXFEU-UHFFFAOYSA-N	4122	CHEMBL9514	COC(=O)Nc1nc2cc(ccc2[nH]1)C(=O)c1cccs1	COC(=O)Nc1nc2cc(C(=O)c3cccs3)ccc2[nH]1	Nocodazole	nocodazole	nocodazole	HPGDS	Tubulin inhibitor	HPGDS		No		-97.25		-52.51	-39.99	0	-76.52	-98.3	-45.27	-98.57	-87.07	-94.2
Valdecoxib	BRD-K12994359	LINCSCP_10344	LNPDTQAFDNKSHK-UHFFFAOYSA-N	119607	CHEMBL865	Cc1onc(c1-c1ccc(cc1)S(N)(=O)=O)-c1ccccc1	Cc1onc(-c2ccccc2)c1-c1ccc(S(N)(=O)=O)cc1	Valdecoxib	valdecoxib	valdecoxib	PTGS2	Anti-Inflammatory	PTGS2, CA12, CYP2C19	Valdecoxib is a nonsteroidal anti-inflammatory drug, cyclooxygenase-2 inhibitor.	No	kinase	84.46		65.54	99.35	19.58	92.74	65.04	95.28	24.14	74.92	0
4,5-Dianilinophthalimide	BRD-K13087974	LINCSCP_16618	AAALVYBICLMAMA-UHFFFAOYSA-N	1697	CHEMBL268868	O=C1NC(=O)c2cc(Nc3ccccc3)c(Nc3ccccc3)cc12	O=C1NC(=O)c2cc(Nc3ccccc3)c(Nc3ccccc3)cc21	4,5-Dianilinophthalimide	4,5-dianilinophthalimide	CGP 52411	EGFR	Tyrosine kinase Receptor	160nM EGFR, 1.6uM CYP3A4, 2.5uM GLS,	Cell membrane (EGF signalling) and Nuclear role (DNA-PK) IR and EGFR activation and negative cooperativity PMID: 32297376. soluble EGFR described as a T2DM and hepatic IR biomarker: PMID: 33005239. hyperinsulinemia causes resistance to EGFR inhibitor (gefitinib) PMID: 32963612. An EGRF ligand is amphiregulin (induced by High fat feeding) PMID: 32135161. Pro inflammatory RHBDF2 (iRHOM2) promotes i…	Yes	Kinase	81.3		44.78	38.59	97.48	68.95	38.18	99.28	67.7	30.22	-70
BMS-345541 free base	BRD-K13566078	LINCSCP_11007	PSPFQEBFYXJZEV-UHFFFAOYSA-N	9813758	CHEMBL249697	Cc1cnc2c(NCCN)nc3ccc(C)cc3n12	Cc1ccc2nc(NCCN)c3ncc(C)n3c2c1	BMS-345541 free base	BMS-345541	BMS-345541	IKBKB	Inflammatory	IKBKB, CHUK		Yes	kinase	-87.56	-93.63	-90.04	-61.57	-92.36	-58.07	-68.97	-90.27	0	0	0
IKK Inhibitor VII	BRD-K14618467	LINCSCP_11416	BWZJBXAPRCVCKQ-UHFFFAOYSA-N	9549298	CHEMBL200027	O=C(N1CCC(CC1)N1CCCC1)c1ccc(Nc2nccc(n2)-c2cc3ccccc3s2)cc1	O=C(c1ccc(Nc2nccc(-c3cc4ccccc4s3)n2)cc1)N1CCC(N2CCCC2)CC1	IKK Inhibitor VII	IKK-16	IKK-16	IKBKB	Anti-Inflammatory	IKBKB	Inhibitory κB kinase (IKK) plays a key role in the regulation of NF-κB activation PMID: 24854310	Yes	kinase	80.88		84.38	96.84	0	60.29	99.37	34.22	0	-81.52	0
1-(6,7-Dimethoxyquinazolin-4-yl)-3-(pyridin-2-yl)-1H-1,2,4-triazol-5-amine	BRD-K15592317	LINCSCP_111367	ILBRKJBKDGCSCB-UHFFFAOYSA-N	44551660	CHEMBL2143829	COc1cc2ncnc(-n3nc(nc3N)-c3ccccn3)c2cc1OC	COc1cc2ncnc(-n3nc(-c4ccccn4)nc3N)c2cc1OC	1-(6,7-Dimethoxyquinazolin-4-yl)-3-(pyridin-2-yl)-1H-1,2,4-triazol-5-amine	CP466722	CP-466722	ATM	PI3K	ATM		Yes	kinase	76.64	96.98	78.77	53.37	0	74.75	66.91	93.38	0	-14.87	0
Tenofovir	BRD-K15891719	LINCSCP_16623	SGOIRFVFHAKUTI-ZCFIWIBFSA-N	464205	CHEMBL483	C[C@H](Cn1cnc2c(N)ncnc12)OCP(O)(O)=O	C[C@H](Cn1cnc2c(N)ncnc21)OC[PH](=O)(=O)O	Tenofovir	tenofovir	tenofovir	Unknown	Antiviral	inhibiting viral DNA polymerase		No		-78.75	90.42	36.24	-84.35	-74.74	0	-72.78	-93.45	-95	-14.37	24.95
n/a	BRD-K17349619	LINCSCP_10533	LNRUPMPQQGPSQT-UHFFFAOYSA-N	435678	CHEMBL1358065	CN(C)CCCNc1c2ccccc2n(C)c2nc(=O)n(C)c(=O)c12	CN(C)CCCN=c1c2ccccc2n(C)c2[nH]c(=O)n(C)c(=O)c12	n/a	HLI-373	HLI-373	MDM2	MDM inhibitor	MDM2		No		-94.93	-70.37	-72.9	-87.67	-69.29	-95.05	-51.57	-35.37	-91.87	-95.87	0
Tyrphostin AG 835	BRD-K17415526	LINCSCP_14417	UMGQVUWXNOJOSJ-DGGAMASNSA-N	5328769	CHEMBL261557	C[C@H](NC(=O)C(=C\c1ccc(O)c(O)c1)\C#N)c1ccccc1	C[C@H](NC(=O)C(C#N)=Cc1ccc(O)c(O)c1)c1ccccc1	Tyrphostin AG 835	tyrphostin-AG-835	tyrphostin-AG-835	ALOX15	Lipoxygenase inhibitor	250nM ALOX15 inhibitor; 740nM EGFR	ALOX15 gene product is implicated in antiinflammation, membrane remodeling	No		-90.56		-41.65	79.9	0	0	-91.1	0	-91.74	-93.03	-73.46
Belinostat	BRD-K17743125	LINCSCP_100682	NCNRHFGMJRPRSK-MDZDMXLPSA-N	6918638	CHEMBL408513	ONC(=O)\C=C\c1cccc(c1)S(=O)(=O)Nc1ccccc1	O=S(=O)(Nc1ccccc1)c1cccc(/C=C/C(O)=NO)c1	Belinostat	belinostat	belinostat	HDAC1	HDAC inhibitor	HDAC1, HDAC2, HDAC3, HDAC4, HDAC5, HDAC6, HDAC7, HDAC8, HDAC9		No		-86		27.86	-94.01	0	32.32	-98.3	0	-94.15	-60.3	0
Carbamimidothioic acid 2-[4-[(4-nitrophenyl)methoxy]phenyl]ethyl ester	BRD-K17743697	LINCSCP_11422	UMJUNUMSJDTYTM-UHFFFAOYSA-N	4534086	CHEMBL1433489	NC(=N)SCCc1ccc(OCc2ccc(cc2)[N+]([O-])=O)cc1	N=C(N)SCCc1ccc(OCc2ccc([N+](=O)[O-])cc2)cc1	Carbamimidothioic acid 2-[4-[(4-nitrophenyl)methoxy]phenyl]ethyl ester	KB-R7943	KB-R7943	SLC8A1	Calcium	SLC8A1, TRPC3, TRPC5, TRPC6	SODIUM-CALCIUM EXCHANGER 1; NCX1. Na+/Ca2+ exchange is a druggable target to stimulate β-cell function and proliferation PMID: 29942927. Iwamoto et al. (2004) demonstrated that SEA0400, a specific inhibitor of Ca(2+) entry through NCX1, lowered arterial blood pressure in salt-dependent hypertensive rat models, but not in other types of hypertensive rats or in normotensive rats	No		80.73		45.89	63.74	76.01	91.4	81.86	0	0	-58.4	87.58
7,8,9,10-Tetrahydro-6,10-methano-6H-pyrazino(2,3-h)(3)benzazepine	BRD-K18855837	LINCSCP_16271	JQSHBVHOMNKWFT-DTORHVGOSA-N	5310966	No result	C1[C@H]2CNC[C@@H]1c1cc3nccnc3cc21	c1cnc2cc3c(cc2n1)[C@H]1CNC[C@@H]3C1	7,8,9,10-Tetrahydro-6,10-methano-6H-pyrazino(2,3-h)(3)benzazepine	varenicline	varenicline	CHRNA4	Acetylcholine	CHRNA4, CHRNA3, CHRNA6, CHRNA7, CHRNB2		No		-80.06	85.69	0	-89.41	0	21.6	-88.29	-78.95	0	-59.23	NaN
4-[3-Fluoro-5-(4-morpholinyl)phenyl]-N-[4-[3-(4-morpholinyl)-1,2,4-triazol-1-yl]phenyl]-2-pyrimidinamine	BRD-K19220233	LINCSCP_11013	AHMHIFXJPSHHPH-UHFFFAOYSA-N	25222038	CHEMBL585951	N#Cc1cc(cc(c1)-c1ccnc(Nc2ccc(cc2)-n2cnc(n2)-c2cccnc2)n1)N1CCOCC1	N#Cc1cc(-c2ccnc(Nc3ccc(-n4cnc(-c5cccnc5)n4)cc3)n2)cc(N2CCOCC2)c1	4-[3-Fluoro-5-(4-morpholinyl)phenyl]-N-[4-[3-(4-morpholinyl)-1,2,4-triazol-1-yl]phenyl]-2-pyrimidinamine	JNK-9L	JNK-9L	MAPK8	MAPK	MAPK8, JNK3		No		-61.12		-36.16	-82.24	-98.81	0	-94.31	0	0	0	0
Saracatinib	BRD-K19540840	LINCSCP_102453	OUKYUETWWIPKQR-UHFFFAOYSA-N	10302451	CHEMBL217092	CN1CCN(CCOc2cc(OC3CCOCC3)c3c(Nc4c5OCOc5ccc4Cl)ncnc3c2)CC1	CN1CCN(CCOc2cc(OC3CCOCC3)c3c(Nc4c(Cl)ccc5c4OCO5)ncnc3c2)CC1	Saracatinib	saracatinib	saracatinib	SRC	SRC inhibitor	SRC, ABL1, LCK, YES1	SRC is a nonreceptor tyrosine kinase promotes STAT1 cytoplasmic abundance. SRC inhibitor, SRCIN1, prevents SRc mediated RAS/ERK signalling PMID: 24456795. Loss of SRCIN1 promotes angiogenesis - PMID: 30315850	Yes	kinase	71.75		36.64	13.38	91.76	56.26	64.18	58.89	78.87	50.98	30.43
2-Chloro-6-(1-piperazinyl)pyrazine	BRD-K19554809	LINCSCP_15034	CJAWPFJGFFNXQI-UHFFFAOYSA-N	107992	CHEMBL269521	Clc1cncc(n1)N2CCNCC2	Clc1cncc(N2CCNCC2)n1	2-Chloro-6-(1-piperazinyl)pyrazine	MK-212	MK-212	HTR2A	Serotonin	HTR2A, HTR2B, HTR2C		No		70.24		0	29.35	-99.24	81.05	71.12	-61.95	89.48	64.6	NaN
6-({5-Fluoro-2-[(3,4,5-Trimethoxyphenyl)amino]pyrimidin-4-Yl}amino)-2,2-Dimethyl-2h-Pyrido[3,2-B][1,4]oxazin-3(4h)-One	BRD-K20285085	LINCSCP_102286	NHHQJBCNYHBUSI-UHFFFAOYSA-N	11213558	CHEMBL475251	COc1cc(Nc2ncc(F)c(Nc3ccc4OC(C)(C)C(=O)Nc4n3)n2)cc(OC)c1OC	COc1cc(Nc2ncc(F)c(Nc3ccc4c(n3)NC(=O)C(C)(C)O4)n2)cc(OC)c1OC	6-({5-Fluoro-2-[(3,4,5-Trimethoxyphenyl)amino]pyrimidin-4-Yl}amino)-2,2-Dimethyl-2h-Pyrido[3,2-B][1,4]oxazin-3(4h)-One	fostamatinib	fostamatinib	SYK	SYK inhibitor	SYK, FLT3, RET	SYK is a nonreceptor cytoplasmic kinase. Immune signalling and pro-growth signalling. SYK inhibitor for diabetic complications; PMID: 32462561. FGF21 targets FGFR1/Syk/NLRP3 inflammasome PMID: 31513948. AD target too ? PMID: 33168021	Yes	Kinase	98.31		96.08	82.91	97.98	99.19	92.2	75.52	98.89	74.59	67.16
(2R)-3-Cyclopentyl-2-(4-methylsulfonylphenyl)-N-(2-thiazolyl)propanamide	BRD-K21672174	LINCSCP_10356	NEQSWPCDHDQINX-MRXNPFEDSA-N	9886086	CHEMBL1096435	CS(=O)(=O)c1ccc(cc1)[C@@H](CC1CCCC1)C(=O)Nc1nccs1	CS(=O)(=O)c1ccc(C(CC2CCCC2)C(=O)Nc2nccs2)cc1	(2R)-3-Cyclopentyl-2-(4-methylsulfonylphenyl)-N-(2-thiazolyl)propanamide	RO-28-1675	Ro-28-1675	GCK	Metabolic	GCK	Type II Diabetes Treatment (not usually associated with IR)	No	kinase	84.78		65.16	78.86	75.84	0	92.72	68.69	-66.14	56.17	97.59
1-[4-Amino-7-[3-(2-methoxyethylamino)propyl]-5-(4-methylphenyl)-6-pyrrolo[2,3-d]pyrimidinyl]-2-fluoroethanone	BRD-K24859147	LINCSCP_100843	UPTQGXMIZXGVSC-UHFFFAOYSA-N	56965963	CHEMBL2132289	COCCNCCCn1c(C(=O)CF)c(-c2ccc(C)cc2)c2c(N)ncnc12	COCCNCCCn1c(C(=O)CF)c(-c2ccc(C)cc2)c2c(N)ncnc21	1-[4-Amino-7-[3-(2-methoxyethylamino)propyl]-5-(4-methylphenyl)-6-pyrrolo[2,3-d]pyrimidinyl]-2-fluoroethanone	KIN001-242	Related to FMK-MEA	RPS6KA3	MAPK/MEK/ERK	RPS6KA3	activation of the mitogen-activated kinase? p90RSK-NRF2 signaling in cART-induced senescence was assessed by p90RSK-specific inhibitor (FMK-MEA) PMID: 30586719. p90RSK activation up-regulated ERK5 S496 phosphorylation, inflammation, and apoptosis in Ecs PMID: 29594152	No	kinase	89.78		96.93	22.86	87.59	-55.22	87.16	0	74.5	-49.91	0
[(1R,2R,3E,5S,7S,9E,11R,12S,14S,15R,16S)-16-Benzyl-5,12-dihydroxy-5,7,14-trimethyl-13-methylidene-6,18-dioxo-17-azatricyclo[9.7.0.01,15]octadeca-3,9-dien-2-yl] acetate	BRD-K25504083	LINCSCP_10876	SDZRWUKZFQQKKV-IBUWGYDRSA-N	16760041	CHEMBL1446029	C[C@H]1[C@H]2[C@H](Cc3ccccc3)NC(=O)[C@@]22[C@@H](\C=C\C[C@H](C)C(=O)[C@@](C)(O)\C=C\[C@H]2OC(C)=O)[C@H](O)C1=C	C=C1[C@@H](O)[C@@H]2/C=C/CC(C)C(=O)[C@@](C)(O)/C=C/[C@@H](OC(C)=O)[C@]23C(=O)N[C@@H](Cc2ccccc2)[C@@H]3[C@@H]1C	[(1R,2R,3E,5S,7S,9E,11R,12S,14S,15R,16S)-16-Benzyl-5,12-dihydroxy-5,7,14-trimethyl-13-methylidene-6,18-dioxo-17-azatricyclo[9.7.0.01,15]octadeca-3,9-dien-2-yl] acetate	cytochalasin-d	cytochalasin-d	ACTB	Cytoskeletal	ACTB		No		-86.35	76.98	-75.68	0	0	-31.31	0	-80.13	-94.44	-56.83	-89.39
N-(1-Benzylpiperidin-4-yl)-6,7-dimethoxy-2-(4-methyl-1,4-diazepan-1-yl)quinazolin-4-amine	BRD-K26818574	LINCSCP_100610	OSXFATOLZGZLSK-UHFFFAOYSA-N	25150857	CHEMBL569864	COc1cc2nc(nc(NC3CCN(Cc4ccccc4)CC3)c2cc1OC)N1CCCN(C)CC1	COc1cc2nc(N3CCCN(C)CC3)nc(NC3CCN(Cc4ccccc4)CC3)c2cc1OC	N-(1-Benzylpiperidin-4-yl)-6,7-dimethoxy-2-(4-methyl-1,4-diazepan-1-yl)quinazolin-4-amine	BIX-01294	BIX-01294	EHMT1	DNA	EHMT1, EHMT2		No		-89.97		-93.56	-95.59	0	-67.54	0	-62.1	62.73	-94.44	NaN
(5-Methoxy-1H-indol-2-yl)-phenylmethanone	BRD-K26997899	LINCSCP_14048	ICMIJSRDISNKOC-UHFFFAOYSA-N	3921152	CHEMBL140220	COc1ccc2[nH]c(cc2c1)C(=O)c1ccccc1	COc1ccc2[nH]c(C(=O)c3ccccc3)cc2c1	(5-Methoxy-1H-indol-2-yl)-phenylmethanone	SA-792574	SA-792574	TUBB	Tubulin inhibitor	TUBB		No		-97.99		-97.47	-43.93	0	-63.6	-81.79	-80.94	-99.15	-95.69	-87.46
Xolegel	BRD-K29113274	LINCSCP_178752	XMAYWYJOQHXEEK-OZXSUGGESA-N	456201	No result	CC(=O)N1CCN(CC1)c1ccc(OC[C@H]2CO[C@@](Cn3ccnc3)(O2)c2ccc(Cl)cc2Cl)cc1	CC(=O)N1CCN(c2ccc(OC[C@H]3CO[C@](Cn4ccnc4)(c4ccc(Cl)cc4Cl)O3)cc2)CC1	Xolegel	ketoconazole	ketoconazole	AR	Steriod	AR, CYP19A1, CYP21A2, CYP2C19, CYP3A5, CYP3A7, KCNA10	PMID: 27789139 2016 Ketoconazole sulfonamide analogs for MS; "suppressing steroidogenesis in Cushing's disease" PMID: 26858837	No		73.23	-83.73	63.61	73.15	0	0	67.37	NaN	0	0	NaN
Pitavastatin calcium	BRD-K30097969	LINCSCP_16130	RHGYHLPFVJEAOC-FFNUKLMVSA-L	11251522	CHEMBL1237061	O[C@H](C[C@H](O)/C=C/c1c(nc2ccccc2c1c3ccc(F)cc3)C4CC4)CC(=O)O[Ca]OC(=O)C[C@H](O)C[C@H](O)/C=C/c5c(nc6ccccc6c5c7ccc(F)cc7)C8CC8	O=C(C[C@H](O)C[C@H](O)/C=C/c1c(C2CC2)nc2ccccc2c1-c1ccc(F)cc1)O[Ca]OC(=O)C[C@H](O)C[C@H](O)/C=C/c1c(C2CC2)nc2ccccc2c1-c1ccc(F)cc1	Pitavastatin calcium	pitavastatin	pitavastatin	HMGCR	HMGCR inhibitor	HMGCR, APOA1, CYP2C8		No		-73		-56.44	-80.33	-29.53	-30.52	-94.37	-27.33	-95.82	23.72	61.75
3-(4-Amino-1-propan-2-ylpyrazolo[3,4-d]pyrimidin-3-yl)-N-(3,4-dihydro-2H-pyrrol-5-yl)benzamide	BRD-K30677119	LINCSCP_10368	RWRBSEISHUTNQL-UHFFFAOYSA-N	73707372	No result	CC(C)n1nc(-c2cccc(c2)C(=O)NC2=NCCC2)c2c(N)ncnc12	CC(C)n1nc(-c2cccc(C(=O)N=C3CCCN3)c2)c2c(N)ncnc21	3-(4-Amino-1-propan-2-ylpyrazolo[3,4-d]pyrimidin-3-yl)-N-(3,4-dihydro-2H-pyrrol-5-yl)benzamide	PP-30	PP-30	RAF1	RAF inhibitor	RAF1	RAF1 increased in obese IR PMID: 17986714. Interacts with insulin signalling PMID: 32982400. Listed as a AKT1 substrate. Part of RAF to EMK to MAPK cascade (? Where MAPK feedback inhibits RAF). RAF inhibitors can block MAPK signalling but context specific (activate the RAF-MEK-ERK pathway in a RAS-dependent manner,). PMID: 20130580	No	kinase	72.45	85.14	64.24	78.46	51.07	-65.6	62.91	94.99	62.74	35.46	0
Bisindolylmaleimide IV	BRD-K31342827	LINCSCP_10370	DQYBRTASHMYDJG-UHFFFAOYSA-N	2399	CHEMBL266487	CN(C)CCCn1cc(C2=C(C(=O)NC2=O)c3c[nH]c4ccccc34)c5ccccc15	CN(C)CCCn1cc(C2=C(c3c[nH]c4ccccc34)C(=O)NC2=O)c2ccccc21	Bisindolylmaleimide IV	bisindolylmaleimide	BRD-K49448285	CCND1	PKC	4nM PRKCA, 6nM PRKCE, 15nM PRKCD, 18nM PIM1,	PKC i– relieves IR in adipocytes PMID: 30391544 Age related insulin resistance PMID: 26307588	Yes	kinase	87.23		80.69	0	96.15	0	95.51	86.94	79.16	10.54	-50.03
5'-O-[(4-Cyanophenyl)methyl]-8-[[(3,4-dichlorophenyl)methyl]amino]-adenosine	BRD-K32330832	LINCSCP_13504	ZXGGCBQORXDVTE-UMCMBGNQSA-N	25195348	CHEMBL470334	Nc1ncnc2n([C@@H]3O[C@H](COCc4ccc(cc4)C#N)[C@@H](O)[C@H]3O)c(NCc3ccc(Cl)c(Cl)c3)nc12	N#Cc1ccc(COC[C@H]2O[C@@H](n3c(NCc4ccc(Cl)c(Cl)c4)nc4c(N)ncnc43)[C@H](O)[C@@H]2O)cc1	5'-O-[(4-Cyanophenyl)methyl]-8-[[(3,4-dichlorophenyl)methyl]amino]-adenosine	VER-155008	VER-155008	HSPA1A	HSP	HSPA1A	PMID: 30469446 Reduces response to IGF-1 MAPK pathway\	No		86.76		64.27	0	86.01	-69.91	98.12	85.38	64.17	-20.14	85.87
1,3-Dihydroxy-6-methoxy-8-methyl-9-xanthenone	BRD-K33193182	LINCSCP_18572	RFENQGQGMLPVJM-UHFFFAOYSA-N	5377914	No result	COc1cc(C)c2c(=O)c3c(O)cc(O)cc3oc2c1	COc1cc(C)c2c(=O)c3c(O)cc(O)cc3oc2c1	1,3-Dihydroxy-6-methoxy-8-methyl-9-xanthenone	methylnorlichexanthone	1,3-dihydroxy-6-methoxy-8-methyl-9-xanthenone	AURKB	Metabolic	AURKB, KDR, PIM1	PMID: 22061662. "strong radical scavenging activity in comparison with vitamin C". Target not clear from PubChem	No	kinase	76.3		79.11	84.61	NaN	NaN	-92.94	13.11	NaN	NaN	NaN
(4R,6S,8S,9E,11E)-16-Chloro-17,19-dihydroxy-4-methyl-3,7-dioxatricyclo[13.4.0.06,8]nonadeca-1(15),9,11,16,18-pentaene-2,13-dione	BRD-K33551950	LINCSCP_11023	WYZWZEOGROVVHK-VYKNNJQSSA-N	23351218	No result	C[C@@H]1C[C@@H]2O[C@H]2\C=C\C=C\C(=O)Cc2c(Cl)c(O)cc(O)c2C(=O)O1	C[C@@H]1C[C@@H]2OC2=CC=CCC(=O)Cc2c(Cl)c(O)cc(O)c2C(=O)O1	(4R,6S,8S,9E,11E)-16-Chloro-17,19-dihydroxy-4-methyl-3,7-dioxatricyclo[13.4.0.06,8]nonadeca-1(15),9,11,16,18-pentaene-2,13-dione	radicicol	radicicol	HSP90AB1/HSP90AA1	HSP	PTGS2, ACLY, DLAT, HSP90AB1, HSP90B1, MAP3K7, OPRM1, PDK3, HSP90AA1, PTGS2, PDK3		No	kinase	-84.35		31.55	-66.51	-53.15	0	-45.28	0	-93.76	-93.94	-86.72
Arvanil	BRD-K34092021	LINCSCP_14054	QVLMCRFQGHWOPM-ZKWNWVNESA-N	6449767	CHEMBL123254	CCCCC/C=C\C/C=C\C/C=C\C/C=C\CCCC(=O)NCc1ccc(O)c(OC)c1	CCCCC/C=C\C/C=C\C/C=C\C/C=C\CCCC(=O)NCc1ccc(O)c(OC)c1	Arvanil	arvanil	arvanil	CNR1	Inflammatory	CNR1, TRPV1		No		-82.45		-60.71	-36.02	0	-77.17	-93.65	-91.81	0	73.25	-33.25
2-[5-[(4-Methylphenyl)methylthio]-4-(thiophen-2-ylmethyl)-1,2,4-triazol-3-yl]pyridine	BRD-K34508425	LINCSCP_1809	MOYWWOZMMWATFP-UHFFFAOYSA-N	44601473	CHEMBL1705658	Cc1ccc(CSc2nnc(-c3ccccn3)n2Cc2cccs2)cc1	Cc1ccc(CSc2nnc(-c3ccccn3)n2Cc2cccs2)cc1	2-[5-[(4-Methylphenyl)methylthio]-4-(thiophen-2-ylmethyl)-1,2,4-triazol-3-yl]pyridine	KUC103898N	KU-C103898N	OPRK1	Opioid	OPRK1	uM inhbitor of OPRK1, 10uM vs SMAD3 (?)	No		74.64		-60.49	19.1	52.4	-63.82	66.11	0	98.75	-83.88	54.26
4-[[(2S)-2-(3-Chlorophenyl)-2-hydroxyethyl]amino]-3-[7-methyl-5-(4-morpholinyl)-1H-benzimidazol-2-yl]-2(1H)-pyridinone	BRD-K34581968	LINCSCP_10374	ZWVZORIKUNOTCS-OAQYLSRUSA-N	135440466	CHEMBL401930	Cc1cc(cc2[nH]c(nc12)-c1c(NC[C@@H](O)c2cccc(Cl)c2)cc[nH]c1=O)N1CCOCC1	Cc1cc(N2CCOCC2)cc2[nH]c(-c3c(NC[C@@H](O)c4cccc(Cl)c4)cc[nH]c3=O)nc12	4-[[(2S)-2-(3-Chlorophenyl)-2-hydroxyethyl]amino]-3-[7-methyl-5-(4-morpholinyl)-1H-benzimidazol-2-yl]-2(1H)-pyridinone	BMS-536924	BMS-536924	IGF1R	Tyrosine kinase Receptor	IGF1R, AKT1, CCNE1, CDK2, CYP3A4, ERBB2, INSR, KDR, LCK, MAPK1, MET, PDGFRA, PDGFRB	an ATP-competitive IGF-1R/IR inhibitor in glioma. Anti-growth.	Yes	kinase	85.48	92.81	-57.04	0	70.61	44.6	72.87	20.49	77.81	96.3	0
2-[2-Methoxy-5-[[(E)-2-(2,4,6-trimethoxyphenyl)ethenyl]sulfonylmethyl]anilino]acetaldehyde	BRD-K35687265	LINCSCP_10885	POSHWWRILMRTTE-JXMROGBWSA-N_x000D_	73707390	No result	COc1cc(OC)c(\C=C\S(=O)(=O)Cc2ccc(OC)c(NCC=O)c2)c(OC)c1	COc1cc(OC)c(/C=C/S(=O)(=O)Cc2ccc(OC)c(NCC=O)c2)c(OC)c1	2-[2-Methoxy-5-[[(E)-2-(2,4,6-trimethoxyphenyl)ethenyl]sulfonylmethyl]anilino]acetaldehyde	ON-01910	ON-01910	PLK1	Cell Cycle	F2R, CDK1, FLT1, FYN, MCL1, PDGFRA, PLK1, PLK2, SRC	Rigosertib; cytotoxic	No	kinase	-97.36	75.12	-93.8	-45.37	0	-75.42	-80.93	-86.52	-98.6	-71.2	-92.43
PU-H71	BRD-K36529613	LINCSCP_11026	SUPVGFZUWFMATN-UHFFFAOYSA-N	9549213	CHEMBL200102	CC(C)NCCCn1c(Sc2cc3OCOc3cc2I)nc2c(N)ncnc12	CC(C)NCCCn1c(Sc2cc3c(cc2I)OCO3)nc2c(N)ncnc21	PU-H71	PU-H71	PU-H71	HSP90AA1	HSP	HSP90AA1	Activates HSF1 and improves Diabetes in mouse; PMID: 23261432 PMID: 29434648. HSP90 may regulate IR degration - PMID: 9556607. ATPase cycle and chaperone function PMID: 11274138, PMID: 15577939, PMID: 15937123, PMID: 27353360, PMID: 29127155. Inhibition of Hsp90 has been shown to improve glucose tolerance and insulin sensitivity in mouse models of diabetes PMID: 29434648.	No		75.64		82.46	43.8	0	28.97	92.9	97.43	74.53	0	0
1-[(4-Phenylphenyl)methyl]-5-(trifluoromethoxy)indole-2,3-dione	BRD-K37456065	LINCSCP_1396	SPBGRXOPAXZSER-UHFFFAOYSA-N	45281794	CHEMBL593506	FC(F)(F)Oc1ccc2N(Cc3ccc(cc3)-c3ccccc3)C(=O)C(=O)c2c1	O=C1C(=O)N(Cc2ccc(-c3ccccc3)cc2)c2ccc(OC(F)(F)F)cc21	1-[(4-Phenylphenyl)methyl]-5-(trifluoromethoxy)indole-2,3-dione	VU 0365114	VU 0365114	CHRM5	Acetylcholine	CHRM5		No		-78.38		-85.36	-17.23	-32.14	-52.22	NaN	0	-97.85	-18.34	-65.52
N,N-Dimethyl-5-[(4-phenylphenyl)methyl]-1-tetrazolecarboxamide	BRD-K37865504	LINCSCP_10376	GZNIYOXWFCDBBJ-UHFFFAOYSA-N	11507802	CHEMBL509860	CN(C)C(=O)n1nnnc1Cc1ccc(cc1)-c1ccccc1	CN(C)C(=O)n1nnnc1Cc1ccc(-c2ccccc2)cc1	N,N-Dimethyl-5-[(4-phenylphenyl)methyl]-1-tetrazolecarboxamide	LY-2183240	LY2183240	FAAH	Metabolic	FAAH	Faah - fatty acid amide hydrolase inhbitor; membrane-associated serine hydrolase. hydrolyzes endogenous bioactive fatty acid amides, including anandamide and oleamide, thus terminating their activity	No		-79.92		64.63	-16.44	20.72	-72.8	-89.09	-97.57	-78.75	-21.18	-66.62
Torin 1	BRD-K40175214	LINCSCP_100026	AKCRNFFTGXBONI-UHFFFAOYSA-N	49836027	CHEMBL1256459	CCC(=O)N1CCN(CC1)c1ccc(cc1C(F)(F)F)-n1c2c(ccc1=O)cnc1ccc(cc21)-c1cnc2ccccc2c1	CCC(=O)N1CCN(c2ccc(-n3c(=O)ccc4cnc5ccc(-c6cnc7ccccc7c6)cc5c43)cc2C(F)(F)F)CC1	Torin 1	torin-1	torin-1	MTOR	MTOR	<1nM MTOR, 63nM PRKDC, 14nM PIK3CA,		Yes	kinase	67.55	98.24	17.6	0	18.6	56.98	-50.6	88.91	85.34	80.23	0
Hyoscyamine	BRD-K40530731	LINCSCP_14070	RKUNBYITZUJHSG-VFSICIBPSA-N	154417	CHEMBL2449003	CN1[C@H]2CC[C@@H]1C[C@@H](C2)OC(=O)[C@H](CO)c3ccccc3	CN1[C@H]2CC[C@@H]1C[C@H](OC(=O)C(CO)c1ccccc1)C2	Hyoscyamine	hyoscyamine	Daturine	CHRM1	Acetylcholine	CHRM1, CHRM2, CHRM3, CHRM4	Antagonist activity at muscarinic receptors. 6 gene GRS score including CHRM3 associated with IR PMID: 30343302. In Beta cells CHRM3 regulates Glucose-stimulated insulin secretion (agonism) PMID: 32044662. SGAs with the highest clinical incidence of diabetes side-effects, are potent M3R antagonists - PMID: 24114586	No		67.36		69.13	69.28	51.32	85.38	-70.51	20.96	84.53	37.53	0
2-[4-[3-[3-Hydroxy-4-(2-oxoethyl)-2-propylphenoxy]propoxy]phenoxy]acetic acid	BRD-K40656405	LINCSCP_14071	YBEZORYMVISYOA-UHFFFAOYSA-N	4364841	CHEMBL1475137	CCCc1c(O)c(CC=O)ccc1OCCCOc2ccc(OCC(=O)O)cc2	CCCc1c(OCCCOc2ccc(OCC(=O)O)cc2)ccc(CC=O)c1O	2-[4-[3-[3-Hydroxy-4-(2-oxoethyl)-2-propylphenoxy]propoxy]phenoxy]acetic acid	CHEMBL1475137	NOT listed as PPARD at ChEMBL	35uM VDR	Unknown	NOT listed as PPARD at ChEMBL		No		-76.47		14.04	-81.23	-39.88	-44.74	-71.87	0	-81.18	-78.94	-99.18
Efavirenz	BRD-K40758068	LINCSCP_105588	XPOQHMRABVBWPR-ZDUSSCGKSA-N	64139	CHEMBL223228	FC(F)(F)[C@]1(OC(=O)Nc2ccc(Cl)cc12)C#CC1CC1	O=C1Nc2ccc(Cl)cc2[C@@](C#CC2CC2)(C(F)(F)F)O1	Efavirenz	efavirenz	efavirenz	CYP2B6	Nucleoside RT inhibitor	CYP2B6, CYP2C19, CYP2C8, CYP3A4, CYP3A5	Potential Class effect on IR: See PMID: 19898246	No		86.02		86.74	69.22	0	94.87	0	NaN	0	56.23	NaN
Luminespib	BRD-K41859756	LINCSCP_10378	NDAZATDQFDPQBD-UHFFFAOYSA-N	135539077	CHEMBL252164	CCNC(=O)c1noc(c1-c1ccc(CN2CCOCC2)cc1)-c1cc(C(C)C)c(O)cc1O	CCNC(=O)c1noc(-c2cc(C(C)C)c(O)cc2O)c1-c1ccc(CN2CCOCC2)cc1	Luminespib	NVP-AUY922	Luminespib	HSP90AA1	HSP	HSP90AA1, HSP90AA2, HSP90AB1	Activates HSF1 and improves Diabetes in mouse; PMID: 23261432 PMID: 29434648. HSP90 may regulate IR degration - PMID: 9556607. ATPase cycle and chaperone function PMID: 11274138, PMID: 15577939, PMID: 15937123, PMID: 27353360, PMID: 29127155. Inhibition of Hsp90 has been shown to improve glucose tolerance and insulin sensitivity in mouse models of diabetes PMID: 29434648	No		84.57		0	98.25	69.97	87.75	96.6	74.49	0	0	0
N-(6-Aminohexyl)-1-Naphthalenesulfonamide	BRD-K41868777	LINCSCP_13084	FVJRBJIENDRNBE-UHFFFAOYSA-N	4314	CHEMBL1188431	NCCCCCCNS(=O)(=O)c1cccc2ccccc12	NCCCCCCNS(=O)(=O)c1cccc2ccccc12	N-(6-Aminohexyl)-1-Naphthalenesulfonamide	W-5	Tocris-0368	CYP2C19	P450	CYP2C19		No		-89.8		-24.77	18.72	-89.97	-88.55	-99.25	0	-66.12	-72.13	NaN
Flufenamic acid	BRD-K44067360	LINCSCP_11565	LPEPZBJOKDYZAD-UHFFFAOYSA-N	3371	CHEMBL23588	OC(=O)c1ccccc1Nc1cccc(c1)C(F)(F)F	O=C(O)c1ccccc1Nc1cccc(C(F)(F)F)c1	Flufenamic acid	flufenamic-acid	flufenamic-acid	PTGS2	Inflammatory	AKR1C3, AR, PTGS1, PTGS2, ANO1, GJA1, GJA10, GJA3, GJA4, GJA5, GJA8, GJA9, GJB1, GJB2, GJB3, GJB4, GJB5, GJB6, GJB7, GJC1, GJC2, GJC3, GJD2, GJD3, GJD4, GJE1, PANX1, PANX2, PANX3, PKD2L1, TRPC5, TRPM2, TRPM5		No		-84.2		-12.62	-90.74	0	-47.45	-24.01	-87.87	-92.39	-66.42	0
6-Phenyl-N-[(4-phenylphenyl)methyl]-3-(2-pyridinyl)-1,2,4-triazin-5-amine	BRD-K44432556	LINCSCP_10748	QNRODODTMXCRKU-UHFFFAOYSA-N	46742353	CHEMBL2144958	C(Nc1nc(nnc1-c1ccccc1)-c1ccccn1)c1ccc(cc1)-c1ccccc1	c1ccc(-c2ccc(CNc3nc(-c4ccccn4)nnc3-c3ccccc3)cc2)cc1	6-Phenyl-N-[(4-phenylphenyl)methyl]-3-(2-pyridinyl)-1,2,4-triazin-5-amine	VU0418946-1	VU0418946-1	HIF1A	HIF activator	HIF1A		No		-81.33		-62.46	-70.6	-28.19	-22.65	0	-48.04	-91.2	-81.45	-92.88
3-(Carbamoylamino)-5-(3-fluorophenyl)-N-[(3R)-3-piperidinyl]-2-thiophenecarboxamide	BRD-K46056750	LINCSCP_10895	IAYGCINLNONXHY-GFCCVEGCSA-N	67077825	No result	NC(=O)Nc1cc(sc1C(=O)N[C@@H]1CCCNC1)-c1cccc(F)c1	NC(=O)Nc1cc(-c2cccc(F)c2)sc1C(=O)N[C@@H]1CCCNC1	3-(Carbamoylamino)-5-(3-fluorophenyl)-N-[(3R)-3-piperidinyl]-2-thiophenecarboxamide	AZD-7762	AZD-7762	CHEK1	Cell Cycle	CHEK1, CHEK2		No	kinase	81.06	97.46	57.03	-81.27	94.08	37.58	0	94.82	0	0	80.89
1-(Tert-Butyl)-3-(p-tolyl)-1H-pyrazolo[3,4-d]pyrimidin-4-amine	BRD-K47598052	LINCSCP_11298	ZVPDNRVYHLRXLX-UHFFFAOYSA-N	1400	CHEMBL306380	Cc1ccc(cc1)-c1nn(c2ncnc(N)c12)C(C)(C)C	Cc1ccc(-c2nn(C(C)(C)C)c3ncnc(N)c23)cc1	1-(Tert-Butyl)-3-(p-tolyl)-1H-pyrazolo[3,4-d]pyrimidin-4-amine	PP-1	PP-1	LCK, SRC	SRC inhibitor	HCK, RET, SRC	SRC is a nonreceptor tyrosine kinase promotes STAT1 cytoplasmic abundance. SRC inhibitor, SRCIN1, prevents SRc mediated RAS/ERK signalling PMID: 24456795. Loss of SRCIN1 promotes angiogenesis - PMID: 30315850	Yes	kinase	93.76		98.88	62.53	73.64	98.86	91.81	84.01	82.98	51.45	48.12
Bromfenac	BRD-K47679368	LINCSCP_20731	ZBPLOVFIXSTCRZ-UHFFFAOYSA-N	60726	CHEMBL1077	Nc1c(CC(O)=O)cccc1C(=O)c1ccc(Br)cc1	Nc1c(CC(=O)O)cccc1C(=O)c1ccc(Br)cc1	Bromfenac	bromfenac	bromfenac	PTGS1	Anti-Inflammatory	PTGS1, PTGS2		No		80.44	71.35	0	85.52	81.7	42.45	81.17	-64.52	-70.58	81.86	NaN
Podofilox	BRD-K47869605	LINCSCP_108239	YJGVMLPVUAXIQN-XVVDYKMHSA-N	10607	CHEMBL61	COc1cc(cc(OC)c1OC)[C@H]1[C@@H]2[C@H](COC2=O)[C@@H](O)c2cc3OCOc3cc12	COc1cc([C@@H]2c3cc4c(cc3[C@H](O)[C@H]3COC(=O)C23)OCO4)cc(OC)c1OC	Podofilox	podophyllotoxin	podophyllotoxin	IGF1R	Tubulin inhibitor	IGF1R, CASP3, TOP2A, TUBA4A, TUBB		No		-60.15		-15.99	-76.87	-14.22	14.41	-93.65	33.55	-97.66	-27.9	-70.7
(Z,2Z)-4-Amino-2-[amino(methylsulfanyl)methylidene]-3-isocyano-4-methylsulfanylbut-3-enenitrile	BRD-K48427617	LINCSCP_223900	QRTOSWGHCGATQF-YMBWGVAGSA-N	16760692	No result	CS/C(=C(\C#N)/C(=C(\N)/SC)/[N+]#[C-])/N	[C-]#[N+]C(C(=N)SC)C(C#N)C(=N)SC	(Z,2Z)-4-Amino-2-[amino(methylsulfanyl)methylidene]-3-isocyano-4-methylsulfanylbut-3-enenitrile	U-0124	U-0124	MAP3K1	MAPK/MEK/ERK	MAP3K1		No	kinase	70.25		-27.58	56.88	56.9	52.32	23.64	67.23	91.92	0	NaN
N4-(3-Bromophenyl)-N6-methylpyrido[3,4-d]pyrimidine-4,6-diamine	BRD-K48735772	LINCSCP_15061	KFHMLBXBRCITHF-UHFFFAOYSA-N	4707	CHEMBL53753	CNc1cc2c(Nc3cccc(Br)c3)ncnc2cn1	CNc1cc2c(Nc3cccc(Br)c3)ncnc2cn1	N4-(3-Bromophenyl)-N6-methylpyrido[3,4-d]pyrimidine-4,6-diamine	PD-158780	PD-158780	EGFR	Tyrosine kinase Receptor	<1nM EGFR	Cell membrane (EGF signalling) and Nuclear role (DNA-PK) IR and EGFR activation and negative cooperativity PMID: 32297376. soluble EGFR described as a T2DM and hepatic IR biomarker: PMID: 33005239. hyperinsulinemia causes resistance to EGFR inhibitor (gefitinib) PMID: 32963612. An EGRF ligand is amphiregulin (induced by High fat feeding) PMID: 32135161. Pro inflammatory RHBDF2 (iRHOM2) promotes i…	Yes	Kinase	71.28		87.51	78.46	59.72	25.26	-36.79	0	60.83	97.12	NaN
Cetraxate	BRD-K48932581	LINCSCP_225724	FHRSHSOEWXUORL-UHFFFAOYSA-N	2680	CHEMBL2448182	NC[C@H]1CC[C@@H](CC1)C(=O)Oc2ccc(CCC(=O)O)cc2	NCC1CCC(C(=O)Oc2ccc(CCC(=O)O)cc2)CC1	Cetraxate	cetraxate	cetraxate	GAST	Gastrin	GAST	beta-glucuronidase inhibitor; PMID: 1003703	No		79.02	86.43	0	-17.14	82.81	69.95	0	NaN	90.92	-24.85	NaN
Epothilone B	BRD-K48935217	LINCSCP_10750	QXRSDHAAWVKZLJ-PVYNADRNSA-N	448013	CHEMBL94657	C[C@H]1CCC[C@@]2(C)O[C@H]2C[C@H](OC(=O)C[C@H](O)C(C)(C)C(=O)[C@H](C)[C@H]1O)C(\C)=C\c1csc(C)n1	C/C(=C\c1csc(C)n1)[C@@H]1C[C@@H]2O[C@]2(C)CCC[C@H](C)[C@H](O)C(C)C(=O)C(C)(C)[C@@H](O)CC(=O)O1	Epothilone B	epothilone	epothilone	TUBA1A	Tubulin inhibitor	TUBA1A, TUBA1B, TUBA1C, TUBA3C, TUBA4A, TUBA8, TUBB, TUBB1, TUBB3, TUBB4A, TUBB4B		No		-79.45	98.31	0	-96.17	-96.17	-98.07	55.07	0	40.81	0	NaN
Dasatinib	BRD-K49328571	LINCSCP_100204	ZBNZXTGUTAYRHI-UHFFFAOYSA-N	3062316	CHEMBL1421	Cc1nc(Nc2ncc(s2)C(=O)Nc2c(C)cccc2Cl)cc(n1)N1CCN(CCO)CC1	Cc1nc(Nc2ncc(C(=O)Nc3c(C)cccc3Cl)s2)cc(N2CCN(CCO)CC2)n1	Dasatinib	dasatinib	dasatinib	ABL1	SRC inhibitor	ABL1, FYN, LCK, SRC, KIT, YES1, BCR, EPHA2, LYN, PDGFRB, ABL2, BTK, DDR1, DDR2, PDGFRA, STAT5B	SRC is a nonreceptor tyrosine kinase promotes STAT1 cytoplasmic abundance. SRC inhibitor, SRCIN1, prevents SRc mediated RAS/ERK signalling PMID: 24456795. Loss of SRCIN1 promotes angiogenesis - PMID: 30315850	Yes	kinase	84.46		65.8	60.27	99.24	93.92	29.29	63.08	0	75.42	0
Clarithromycin	BRD-K49668410	LINCSCP_1912	AGOYDEPGAOXOCK-KCBOHYOISA-N	84029	CHEMBL1741	CC[C@H]1OC(=O)[C@H](C)[C@@H](O[C@H]2C[C@@](C)(OC)[C@@H](O)[C@H](C)O2)[C@H](C)[C@@H](O[C@@H]2O[C@H](C)C[C@@H]([C@H]2O)N(C)C)[C@@](C)(C[C@@H](C)C(=O)[C@H](C)[C@@H](O)[C@]1(C)O)OC	CC[C@H]1OC(=O)C(C)[C@@H](O[C@H]2C[C@@](C)(OC)[C@@H](O)[C@H](C)O2)[C@H](C)[C@@H](O[C@@H]2O[C@H](C)C[C@H](N(C)C)[C@H]2O)[C@](C)(OC)CC(C)C(=O)C(C)[C@@H](O)[C@]1(C)O	Clarithromycin	clarithromycin	clarithromycin	CYP2C19	Protein	CYP2C19, CYP3A4, CYP3A5, CYP3A7		No		63.78		0	0	44.19	80.82	36.05	NaN	57.77	19.31	NaN
N-[3-[[5-Bromo-4-[[2-(1H-imidazol-5-YL)ethyl]amino]-2-pyrimidinyl]amino]phenyl]-1-pyrrolidinecarboxamide	BRD-K49669041	LINCSCP_11039	DMMILYKXNCVKOJ-UHFFFAOYSA-N	11754511	No result	Brc1cnc(Nc2cccc(NC(=O)N3CCCC3)c2)nc1NCCc1c[nH]cn1	O=C(Nc1cccc(Nc2ncc(Br)c(NCCc3c[nH]cn3)n2)c1)N1CCCC1	N-[3-[[5-Bromo-4-[[2-(1H-imidazol-5-YL)ethyl]amino]-2-pyrimidinyl]amino]phenyl]-1-pyrrolidinecarboxamide	BX-912	BX-912	PDPK1	Aurora kinase inhibitor	PDPK1, AKT2, CDK2, CHEK1, GSK3B, KDR, PDK1		No	kinase	-66.15		-74.22	-74.4	0	-45.79	0	0	-81.65	-41.04	0
N-[(2R)-2,3-Dihydroxypropoxy]-3,4-difluoro-2-[(2-fluoro-4-iodophenyl)amino]benzamide	BRD-K49865102	LINCSCP_100372	SUDAHWBOROXANE-SECBINFHSA-N	9826528	No result	OC[C@@H](O)CONC(=O)c1ccc(F)c(F)c1Nc1ccc(I)cc1F	O=C(NOC[C@H](O)CO)c1ccc(F)c(F)c1Nc1ccc(I)cc1F	N-[(2R)-2,3-Dihydroxypropoxy]-3,4-difluoro-2-[(2-fluoro-4-iodophenyl)amino]benzamide	PD-0325901	PD-0325901	MAP2K1	MAPK/MEK/ERK	MAP2K1, MAP2K2		Yes	kinase	90.97		87	11.2	80.79	0	0	-54.03	81.23	56.01	90.85
(1-(2-(Methylsulfonylamino)ethyl)-4-piperidinyl)methyl 1-methyl-1H-indole-3-carboxylate	BRD-K49945136	LINCSCP_14742	MOZPSIXKYJUTKI-UHFFFAOYSA-N	119376	CHEMBL33884	Cn1cc(C(=O)OCC2CCN(CCNS(C)(=O)=O)CC2)c2ccccc12	Cn1cc(C(=O)OCC2CCN(CCNS(C)(=O)=O)CC2)c2ccccc21	(1-(2-(Methylsulfonylamino)ethyl)-4-piperidinyl)methyl 1-methyl-1H-indole-3-carboxylate	GR-113808	GR-113808	HTR4	Serotonin	HTR4		No		65.29		65.36	91.28	93.99	49.8	-17.53	44.27	0	62.04	70.21
Canertinib	BRD-K50168500	LINCSCP_106893	OMZCMEYTWSXEPZ-UHFFFAOYSA-N	156414	CHEMBL31965	Fc1ccc(Nc2ncnc3cc(OCCCN4CCOCC4)c(NC(=O)C=C)cc23)cc1Cl	C=CC(=O)Nc1cc2c(Nc3ccc(F)c(Cl)c3)ncnc2cc1OCCCN1CCOCC1	Canertinib	canertinib	canertinib	EGFR, ERBB4	Tyrosine kinase Receptor	<1nM EGFR	Cell membrane (EGF signalling) and Nuclear role (DNA-PK) IR and EGFR activation and negative cooperativity PMID: 32297376. soluble EGFR described as a T2DM and hepatic IR biomarker: PMID: 33005239. hyperinsulinemia causes resistance to EGFR inhibitor (gefitinib) PMID: 32963612. An EGRF ligand is amphiregulin (induced by High fat feeding) PMID: 32135161. Pro inflammatory RHBDF2 (iRHOM2) promotes i…	Yes	Kinase	93.97		78.32	0	99.53	95.02	98.61	0	96.88	98.88	0
N-[(2R)-4-Chloro-3-oxo-1-phenylbutan-2-yl]-4-methylbenzenesulfonamide	BRD-K50311478	LINCSCP_128	MQUQNUAYKLCRME-MRXNPFEDSA-N	25044204	No result	Cc1ccc(cc1)S(=O)(=O)N[C@H](Cc2ccccc2)C(=O)CCl	Cc1ccc(S(=O)(=O)NC(Cc2ccccc2)C(=O)CCl)cc1	N-[(2R)-4-Chloro-3-oxo-1-phenylbutan-2-yl]-4-methylbenzenesulfonamide	tosyl-phenylalanyl-chloromethyl-ketone	tosyl-phenylalanyl-chloromethyl-ketone	Unknown	Unknown	Unknown		No	kinase	81.9		-45.06	53.9	0	0	90.86	-48.45	95.33	65.63	83.77
2-{[2-Ethoxy-4-(4-hydroxypiperidin-1-yl)phenyl]amino}-5,11-dimethyl-5,11-dihydro-6H-pyrimido[4,5-b][1,4]benzodiazepin-6-one	BRD-K50387473	LINCSCP_100780	QAPAJIZPZGWAND-UHFFFAOYSA-N	46843772	CHEMBL1673046	CCOc1cc(ccc1Nc1ncc2N(C)C(=O)c3ccccc3N(C)c2n1)N1CCC(O)CC1	CCOc1cc(N2CCC(O)CC2)ccc1Nc1ncc2c(n1)N(C)c1ccccc1C(=O)N2C	2-{[2-Ethoxy-4-(4-hydroxypiperidin-1-yl)phenyl]amino}-5,11-dimethyl-5,11-dihydro-6H-pyrimido[4,5-b][1,4]benzodiazepin-6-one	XMD-892	XMD-892	MAPK7	MAPK/MEK/ERK	MAPK7, DCLK2, LRRK2, PLK4, TNK1		Yes	kinase	75.87		-34.27	-41.18	0	79.53	83.65	94.52	0	-15.93	91.53
Estropipate	BRD-K51095933	LINCSCP_15069	HZEQBCVBILBTEP-ZFINNJDLSA-N	5284555	CHEMBL1200980	C[C@@]12CC[C@H]3[C@@H](CCc4cc(OS(=O)(=O)O)ccc34)[C@@H]2CCC1=O	C[C@]12CC[C@@H]3c4ccc(OS(=O)(=O)O)cc4CC[C@H]3[C@@H]1CCC2=O	Estropipate	estropipate	estropipate	ESR1	Steriod	ESR1, ESR2		No		-86.52		-6.72	-32.68	-95.98	3.44	-87.15	0	-80.83	-75	NaN
5-(4-Fluorophenyl)-2-ureidothiophene-3-carboxamide	BRD-K51575138	LINCSCP_100076	SAYGKHKXGCPTLX-UHFFFAOYSA-N	9903786	CHEMBL257167	NC(=O)Nc1sc(cc1C(N)=O)-c1ccc(F)cc1	NC(=O)Nc1sc(-c2ccc(F)cc2)cc1C(N)=O	5-(4-Fluorophenyl)-2-ureidothiophene-3-carboxamide	TPCA-1	TPCA-1	IKBKB, JAK2	JAK	IKBKB/JAK2	IL-6 increases phosphorylation of JAK2, an upstream activator of STAT3. PMID: 15151905 activating the JAK-STAT pathway can also activate PI3K/AKT/mTOR signalling	Yes	kinase	85.62		44.77	97	86.9	47.44	94.3	79.44	70.96	36.81	0
Oxibendazole	BRD-K52075715	LINCSCP_14747	RAOCRURYZCVHMG-UHFFFAOYSA-N	4622	CHEMBL1087630	CCCOc1ccc2nc(NC(=O)OC)[nH]c2c1	CCCOc1ccc2[nH]c(NC(=O)OC)nc2c1	Oxibendazole	oxibendazole	oxibendazole	TUBB	Tubulin inhibitor	TUBB, TUBB4B		No		-70.96		7.29	-21.42	0	0	-96.21	-87.21	-95.63	-32.4	-59.65
Pictilisib	BRD-K52911425	LINCSCP_103464	LHNIIDJUOCFXAP-UHFFFAOYSA-N	17755052	CHEMBL521851	CS(=O)(=O)N1CCN(Cc2cc3nc(nc(N4CCOCC4)c3s2)-c2cccc3[nH]ncc23)CC1	CS(=O)(=O)N1CCN(Cc2cc3nc(-c4cccc5[nH]ncc45)nc(N4CCOCC4)c3s2)CC1	Pictilisib	GDC-0941	GDC-0941	PIK3CG	PI3K	<1nM PIK3CA, 1nM PIK3CG		Yes	kinase	95.95	94.66	43.32	27.23	76.54	81.08	98.74	96.7	95.18	99.34	95.44
Niridazole	BRD-K53123955	LINCSCP_30289	RDXLYGJSWZYTFJ-UHFFFAOYSA-N	6093	CHEMBL152632	[O-][N+](=O)c1cnc(s1)N1CCNC1=O	O=C1NCCN1c1ncc([N+](=O)[O-])s1	Niridazole	niridazole	niridazole	Unknown	Infection	Unknown		No		-70.07		35.61	37.73	-85.44	-48.22	-94.37	0	-64.67	-87.9	NaN
MK-5108	BRD-K53665955	LINCSCP_10086	LCVIRAZGMYMNNT-VVONHTQRSA-N	24748204	No result	OC(=O)[C@@]1(Cc2cccc(Nc3nccs3)n2)CC[C@@H](CC1)Oc1cccc(Cl)c1F	O=C(O)[C@]1(Cc2cccc(Nc3nccs3)n2)CC[C@@H](Oc2cccc(Cl)c2F)CC1	MK-5108	MK-5108	MK-5108	AURKA	Aurora kinase inhibitor	AURKA, AURKB, AURKC		Yes	kinase	-89.61		-94.72	NaN	-92.77	-66.95	50.57	0	18.78	-38	-63.99
Indirubin	BRD-K53959060	LINCSCP_15073	JNLNPCNGMHKCKO-UHFFFAOYSA-N	10177	CHEMBL35349	ON=C1C(=C2C(=O)Nc3ccccc23)Nc4ccccc14	O=Nc1c(-c2c(O)[nH]c3ccccc23)[nH]c2ccccc12	Indirubin	indirubin	Indigo Red	GSK3B	GSK3	GSK3B, MAPT, CDK1, CDK5, CCNE1, CDK2, CDK4, CDK5R1, CDK9, GSK3A, LCK, LRRK1, LRRK2	Indirubin listed as 97nM vs MAPT: Also PKC/GSK inhibitor - acitive indirubin-3'-monoxime (I3M) – relieves IR in adipocytes - PMID: 31409652. 2020 ameliorates obesity-induced metabolic dysfunction by enhancing brown adipose thermogenesis and white adipose browning PMID: 32190098	Yes	kinase	81.23	-69.91	-17.75	88.32	83.7	0	99.45	66.16	-85.42	80.08	NaN
Adavosertib	BRD-K54256913	LINCSCP_100434	BKWJAKQVGHWELA-UHFFFAOYSA-N	24856436	CHEMBL1976040	CN1CCN(CC1)c1ccc(Nc2ncc3c(n2)n(-c2cccc(n2)C(C)(C)O)n(CC=C)c3=O)cc1	C=CCn1c(=O)c2cnc(Nc3ccc(N4CCN(C)CC4)cc3)nc2n1-c1cccc(C(C)(C)O)n1	Adavosertib	MK-1775	MK-1775	PLK1, WEE1	Cell Cycle	PLK1, WEE1, WEE2	"kinase that inhibits cell cycle progression by phosphorylation inhibition of cdc2 kinase" PMID: 15964826	Yes	kinase	-92.9		-99.03	-80.96	0	-12.46	42.58	-93.46	50.87	0	-91.73
N-(4-Hydroxyphenyl)-eicosa-5,8,11,14-tetraenamide	BRD-K55462201	LINCSCP_16199	IJBZOOZRAXHERC-DOFZRALJSA-N	6604822	CHEMBL39878	CCCCC\C=C/C\C=C/C\C=C/C\C=C/CCCC(=O)Nc1ccc(O)cc1	CCCCC/C=C\C/C=C\C/C=C\C/C=C\CCCC(=O)Nc1ccc(O)cc1	N-(4-Hydroxyphenyl)-eicosa-5,8,11,14-tetraenamide	AM-404	AM-404	TRPV1	TRPV	TRPV1, ALOX15, CNR1, CNR2, FAAH	Nanomolar vs transient receptor potential cation channel subfamily V member	No		-63.43		-19	0	-78.78	-83.34	-60.14	NaN	-84.76	0	NaN
Amonafide	BRD-K56334280	LINCSCP_106208	UPALIKSFLSVKIS-UHFFFAOYSA-N	50515	CHEMBL428676	CN(C)CCN1C(=O)c2cccc3cc(N)cc(C1=O)c23	CN(C)CCN1C(=O)c2cccc3cc(N)cc(c23)C1=O	Amonafide	amonafide	amonafide	TOP2A	Topoisomerase inhibitor	TOP2A, TOP2B		No		-96.79	-88.43	-66.19	-97.04	-97.74	-79.72	0	-95.96	-89.99	-86.53	-87.96
Vemurafenib	BRD-K56343971	LINCSCP_10587	GPXBXXGIAQBQNI-UHFFFAOYSA-N	42611257	CHEMBL1229517	CCCS(=O)(=O)Nc1ccc(F)c(C(=O)c2c[nH]c3ncc(cc23)-c2ccc(Cl)cc2)c1F	CCCS(=O)(=O)Nc1ccc(F)c(C(=O)c2c[nH]c3ncc(-c4ccc(Cl)cc4)cc23)c1F	Vemurafenib	vemurafenib	vemurafenib	BRAF	RAF inhibitor	BRAF, CYP2C19, CYP3A4, CYP3A5, RAF1	RAF1 increased in obese IR PMID: 17986714. Interacts with insulin signalling PMID: 32982400. Listed as a AKT1 substrate. Part of RAF to EMK to MAPK cascade (? Where MAPK feedback inhibits RAF). RAF inhibitors can block MAPK signalling but context specific (activate the RAF-MEK-ERK pathway in a RAS-dependent manner,). PMID: 20130576	Yes	kinase	96.55	92.56	6.82	86.49	25.96	99.04	97.37	93.47	94.99	99.31	91.42
Dacinostat	BRD-K56957086	LINCSCP_106256	BWDQBBCUWLSASG-MDZDMXLPSA-N	6445533	CHEMBL356066	OCCN(CCc1c[nH]c2ccccc12)Cc1ccc(\C=C\C(=O)NO)cc1	OCCN(CCc1c[nH]c2ccccc12)Cc1ccc(/C=C/C(O)=NO)cc1	Dacinostat	dacinostat	dacinostat	HDAC1	HDAC inhibitor	HDAC1, HDAC2, HDAC3, HDAC4, HDAC5, HDAC6, HDAC7, HDAC8, HDAC9		No		-93.88		-73.83	-94.84	-91	7.16	-96.79	-36.87	-88.17	-71.79	0
2-[[(1R)-1-[7-Methyl-2-(4-morpholinyl)-4-oxo-4H-pyrido[1,2-a]pyrimidin-9-yl]ethyl]amino]benzoic acid	BRD-K58772419	LINCSCP_11050	IRTDIKMSKMREGO-OAHLLOKOSA-N	44137675	CHEMBL2165191	C[C@@H](Nc1ccccc1C(O)=O)c1cc(C)cn2c1nc(cc2=O)N1CCOCC1	Cc1cc([C@@H](C)Nc2ccccc2C(=O)O)c2nc(N3CCOCC3)cc(=O)n2c1	2-[[(1R)-1-[7-Methyl-2-(4-morpholinyl)-4-oxo-4H-pyrido[1,2-a]pyrimidin-9-yl]ethyl]amino]benzoic acid	AZD-6482	AZD-6482	PIK3CD	PI3K	10nM PIK3CB, 80nM PIK3CD		Yes	kinase	85.5		28.57	87.68	0	68.48	72.93	84.1	95.55	99.26	34.75
Cisaprida	BRD-K59163477	LINCSCP_34607	DCSUBABJRXZOMT-IRLDBZIGSA-N	6917698	CHEMBL560739	CO[C@@H]1CN(CCCOc2ccc(F)cc2)CC[C@@H]1NC(=O)c3cc(Cl)c(N)cc3OC	COc1cc(N)c(Cl)cc1C(=O)N[C@H]1CCN(CCCOc2ccc(F)cc2)C[C@H]1OC	Cisaprida	cisapride	BRD-K06895174	HTR4	Acetylcholine	HTR4, KCNH2, CYP2B6, CYP2C8, CYP3A5, CYP3A7, HTR2A, HTR3A	Trialled in T2DM for gastric empyting PMID: 10566120	No		74.11		80.35	0	89.5	-64.04	-41.53	88.54	88.9	-25.67	NaN
N-[(1R)-2-(Tert-butylamino)-2-oxo-1-(3-pyridinyl)ethyl]-N-(4-tert-butylphenyl)-2-furancarboxamide	BRD-K59633790	LINCSCP_1412	JXGIYKRRPGCLFV-JOCHJYFZSA-N	46897844	CHEMBL2311740	CC(C)(C)NC(=O)[C@H](N(C(=O)c1ccco1)c1ccc(cc1)C(C)(C)C)c1cccnc1	CC(C)(C)NC(=O)C(c1cccnc1)N(C(=O)c1ccco1)c1ccc(C(C)(C)C)cc1	N-[(1R)-2-(Tert-butylamino)-2-oxo-1-(3-pyridinyl)ethyl]-N-(4-tert-butylphenyl)-2-furancarboxamide	VU-0420363-1	VU-0420363-1	Unknown	Proteinase inhibitor	unknown		No		74.07		-19.67	-11.54	88.54	0	NaN	81.1	0	52.09	59.79
Vindesine	BRD-K59753975	LINCSCP_1919	HHJUWIANJFBDHT-KOTLKJBCSA-N	40839	CHEMBL219146	CC[C@]1(O)C[C@H]2CN(C1)CCc1c([nH]c3ccccc13)[C@@](C2)(C(=O)OC)c1cc2c(cc1OC)N(C)[C@@H]1[C@]22CCN3CC=C[C@](CC)([C@@H]23)[C@@H](O)[C@]1(O)C(N)=O	CC[C@]1(O)C[C@H]2CN(CCc3c([nH]c4ccccc34)[C@@](C(=O)OC)(c3cc4c(cc3OC)N(C)[C@H]3[C@@](O)(C(N)=O)[C@H](O)[C@]5(CC)C=CCN6CC[C@]43[C@@H]65)C2)C1	Vindesine	vindesine	vindesine	TUBB	Tubulin inhibitor	TUBB, TUBB1		No		-84.18		-64.13	-48.14	-84.18	-97.02	-46.98	NaN	-96.88	-68.1	NaN
N-Hydroxybenzamide	BRD-K59773493	LINCSCP_17341	VDEUYMSGMPQMIK-UHFFFAOYSA-N	10313	CHEMBL16300	ONC(=O)c1ccccc1	ON=C(O)c1ccccc1	N-Hydroxybenzamide	benzohydroxamic-acid	benzohydroxamic-acid	Unknown	Unknown			No		-83.61		-17.07	NaN	-91.52	-91.34	-56.93	-78.15	-61.17	19.15	-67.82
Z-Leu-leu-leu-al	BRD-K60230970	LINCSCP_101351	TZYWCYJVHRLUCT-VABKMULXSA-N	462382	CHEMBL64925	CC(C)C[C@H](NC(=O)[C@H](CC(C)C)NC(=O)[C@H](CC(C)C)NC(=O)OCc1ccccc1)C=O	CC(C)CC(C=O)NC(=O)C(CC(C)C)NC(=O)C(CC(C)C)NC(=O)OCc1ccccc1	Z-Leu-leu-leu-al	MG-132	MG-132	PSMB1	Proteasome inhibitor	PSMB1		No		-76.62		-52.6	-68.04	80.98	0	-88.77	0	-75.08	0	-81.19
n/a	BRD-K61033289	LINCSCP_10399	No result	No result	No result	CCCCC\C=C\C=C1/[C@@H](C\C=C\CCCC(O)=O)C=CC1=O	CCCCC=CC=CC1=C(CC=CCCCC(=O)O)CCC1=O	n/a	15-delta-prostaglandin-j2	15-delta-prostaglandin-j2	PPARG	Metabolic	PPARG, NR1H4		No		-82.3		-54.67	-23.29	-66.97	-90.36	-35.57	51.23	-85.91	-76.42	0
24,25-Epoxy-cholesterol	BRD-K61480498	LINCSCP_13215	OSENKJZWYQXHBN-XVYZBDJZSA-N	3247059	CHEMBL434302	C[C@H](CC[C@@H]1OC1(C)C)[C@H]1CC[C@H]2[C@@H]3CC=C4C[C@@H](O)CC[C@]4(C)[C@H]3CC[C@]12C	C[C@H](CC[C@@H]1OC1(C)C)[C@H]1CC[C@H]2[C@@H]3CC=C4C[C@@H](O)CC[C@]4(C)[C@H]3CC[C@@]21C	24,25-Epoxy-cholesterol	epoxycholesterol	epoxycholesterol	NR1H2	Metabolic	NR1H2, NR1H3		No		73.22	-84.6	83.79	-75.87	0	0	54.57	97.77	0	98.12	0
(S)-Scoulerine	BRD-K62609077	LINCSCP_13743	KNWVMRVOBAFFMH-HNNXBMFYSA-N	439654	CHEMBL1235966	COc1ccc2C[C@@H]3N(CCc4cc(OC)c(O)cc34)Cc2c1O	COc1cc2c(cc1O)[C@@H]1Cc3ccc(OC)c(O)c3CN1CC2	(S)-Scoulerine	scoulerine	scoulerine	DRD1	Dopamine	ADRA1D, ADRA2A, GABRA1		No		-78.03		0	69.42	-91.94	-50.04	-82.95	35.79	82.57	-75.44	82.6
Tipifarnib	BRD-K62965247	LINCSCP_106995	PLHJCIYEEKOWNM-HHHXNRCGSA-N	159324	CHEMBL289228	Cn1cncc1[C@@](N)(c1ccc(Cl)cc1)c1ccc2n(C)c(=O)cc(-c3cccc(Cl)c3)c2c1	Cn1cncc1[C@@](N)(c1ccc(Cl)cc1)c1ccc2c(c1)c(-c1cccc(Cl)c1)cc(=O)n2C	Tipifarnib	Tipifarnib	tipifarnib-P2	FNTA	Cholesterol	FNTA, FNTB	Zarnestra: "prevents the activation of Ras oncogenes, inhibits cell growth, induces apoptosis, and inhibits angiogenesis"	No		74.37		0	-14.82	97.08	-29.46	85.97	63.79	51.03	55.11	94.25
4,4'-(6-(2-(Difluoromethyl)-1H-benzo[d]imidazol-1-yl)-1,3,5-triazine-2,4-diyl)dimorpholine	BRD-K63068307	LINCSCP_10913	HGVNLRPZOWWDKD-UHFFFAOYSA-N	11647372	CHEMBL586702	FC(F)c1nc2ccccc2n1-c1nc(nc(n1)N1CCOCC1)N1CCOCC1	FC(F)c1nc2ccccc2n1-c1nc(N2CCOCC2)nc(N2CCOCC2)n1	4,4'-(6-(2-(Difluoromethyl)-1H-benzo[d]imidazol-1-yl)-1,3,5-triazine-2,4-diyl)dimorpholine	ZSTK-474	ZSTK-474	PIK3CG	PI3K	3nM PIK3CD, 4nM PIK3R1, 5nM PIK3CG, 6nM PIK3CB		Yes	kinase	69.51	95.03	97.01	80.86	5.35	53.85	0	48.58	77.33	71.55	-48.4
Docetaxel intermediate	BRD-K63265447	LINCSCP_1920	ZDZOTLJHXYCWBA-BSEPLHNVSA-N	11970251	CHEMBL1510899	CC(=O)O[C@]12CO[C@@H]2C[C@H](O)[C@]3(C)[C@@H]1[C@H](OC(=O)c4ccccc4)[C@@]5(O)C[C@H](OC(=O)[C@H](O)[C@@H](NC(=O)OC(C)(C)C)c6ccccc6)C(=C([C@@H](O)C3=O)C5(C)C)C	CC(=O)O[C@@]12CO[C@@H]1C[C@H](O)[C@@]1(C)C(=O)C(=O)C3C(C)C(OC(=O)C(O)C(NC(=O)OC(C)(C)C)c4ccccc4)C[C@](O)([C@@H](OC(=O)c4ccccc4)[C@@H]12)C3(C)C	Docetaxel intermediate	docetaxel	docetaxel	TUBB	Tubulin inhibitor	TUBB, BCL2, MAP2, MAP4, MAPT, NR1I2, TUBB1		No		-84.03	82.72	-38.7	-63.91	-72.86	0	0	NaN	-88.85	0	NaN
2-[4-(1,3-Benzothiazol-2-yl)-2-bromo-6-methoxyphenoxy]acetic acid	BRD-K63954456	LINCSCP_10767	VKGGBLHFFRIHKZ-UHFFFAOYSA-N	2202512	CHEMBL3261381	COc1cc(cc(Br)c1OCC(=O)O)c2nc3ccccc3s2	COc1cc(-c2nc3ccccc3s2)cc(Br)c1OCC(=O)O	2-[4-(1,3-Benzothiazol-2-yl)-2-bromo-6-methoxyphenoxy]acetic acid	BRD-K63954456	STL376292	MIF	Anti-Inflammatory	MIF, TNF		No		80.07		57.61	90.51	85.98	0	0	0	76.67	70.61	NaN
(3S,6S,9S,12R)-3-[(2R)-Butan-2-yl]-6-[(1-methoxy-3-indolyl)methyl]-9-(6-oxooctyl)-1,4,7,10-tetrazabicyclo[10.4.0]hexadecane-2,5,8,11-tetrone	BRD-K64606589	LINCSCP_10116	JWOGUUIOCYMBPV-VWIQTCEGSA-N	44593387	No result	CC[C@@H](C)[C@@H]1NC(=O)[C@H](Cc2cn(OC)c3ccccc23)NC(=O)[C@H](CCCCCC(=O)CC)NC(=O)[C@H]4CCCCN4C1=O	CCC(=O)CCCCCC1NC(=O)C2CCCCN2C(=O)C(C(C)CC)NC(=O)C(Cc2cn(OC)c3ccccc23)NC1=O	(3S,6S,9S,12R)-3-[(2R)-Butan-2-yl]-6-[(1-methoxy-3-indolyl)methyl]-9-(6-oxooctyl)-1,4,7,10-tetrazabicyclo[10.4.0]hexadecane-2,5,8,11-tetrone	apicidin	apicidin	HDAC1	HDAC inhibitor	HDAC1, HDAC10, HDAC11, HDAC2, HDAC3, HDAC4, HDAC5, HDAC6, HDAC7, HDAC8, HDAC9		No		-94.79		0	-75.86	-99.3	0	-89.95	-86.71	0	-99.41	-97.35
N-(1,3-Benzodioxol-5-ylmethyl)-6-chloro-4-quinazolinamine	BRD-K64746805	LINCSCP_15083	CNODHOSDWZLJGA-UHFFFAOYSA-N	6610310	CHEMBL66620	Clc1ccc2ncnc(NCc3ccc4OCOc4c3)c2c1	Clc1ccc2ncnc(NCc3ccc4c(c3)OCO4)c2c1	N-(1,3-Benzodioxol-5-ylmethyl)-6-chloro-4-quinazolinamine	MBCQ	MBCQ	PDE5A	PDE inhibitor	PDE5A	PDE5A is neg regulator of Insulin: PMID: 30774657 PMID: 26964730 PMID: 29797572	No	kinase	87.71		-66.18	81.8	99.81	78.75	-54.68	76.65	82.74	91.02	NaN
N-(6,6-Dimethyl-5-(1-methylpiperidine-4-carbonyl)-1,4,5,6-tetrahydropyrrolo[3,4-c]pyrazol-3-yl)-3-methylbutanamide	BRD-K64800655	LINCSCP_107439	HUXYBQXJVXOMKX-UHFFFAOYSA-N	46191454	CHEMBL1230607	CC(C)CC(=O)Nc1n[nH]c2c1CN(C(=O)C1CCN(C)CC1)C2(C)C	CC(C)CC(=O)Nc1[nH]nc2c1CN(C(=O)C1CCN(C)CC1)C2(C)C	N-(6,6-Dimethyl-5-(1-methylpiperidine-4-carbonyl)-1,4,5,6-tetrahydropyrrolo[3,4-c]pyrazol-3-yl)-3-methylbutanamide	PHA-793887	PHA-793887	FARSB, CDK2	Cell Cycle	CDK1, CDK2, CDK4, CDK5, CCND1, CCNE1, CDK7, CDK9		No	kinase	-89.63	-76.09	-45.77	-57.06	0	-41.25	-81.09	-92.54	-72.7	-96.59	-59.54
(5-(4-(((5-Methylfuran-2-yl)methyl)amino)quinazolin-6-yl)furan-2-yl)methanol	BRD-K64835161	LINCSCP_1833	ROCFOIBAEVAOLQ-UHFFFAOYSA-N	44968231	CHEMBL1604618	Cc1ccc(CNc2ncnc3ccc(cc23)-c2ccc(CO)o2)o1	Cc1ccc(CNc2ncnc3ccc(-c4ccc(CO)o4)cc23)o1	(5-(4-(((5-Methylfuran-2-yl)methyl)amino)quinazolin-6-yl)furan-2-yl)methanol	BRD-K64835161	NCGC-00188654	CLK1	RNA	CLK1, CLK4, DYRK1B	Mutations in the clk-1 gene impair mitochondrial ubiquinone biosynthesis and extend lifespan in C. elegans PMID: 30198021. splicing in a process apparently regulated by protein phosphorylation; age mutant PMID: 16306402	Yes	kinase	77.23		76.17	63.7	71.91	53.1	0	-44.67	0	97.01	76.15
Afatinib	BRD-K66175015	LINCSCP_107499	ULXXDDBFHOBEHA-CWDCEQMOSA-N	10184653	CHEMBL1173655	CN(C)C\C=C\C(=O)Nc1cc2c(Nc3ccc(F)c(Cl)c3)ncnc2cc1O[C@H]1CCOC1	CN(C)C=CCC(=O)Nc1cc2c(Nc3ccc(F)c(Cl)c3)ncnc2cc1O[C@H]1CCOC1	Afatinib	afatinib	afatinib	EGFR	Tyrosine kinase Receptor	<1nM EGFR, 1nM ERBB2,3,4, ABL1500nM	Cell membrane (EGF signalling) and Nuclear role (DNA-PK) IR and EGFR activation and negative cooperativity PMID: 32297376. soluble EGFR described as a T2DM and hepatic IR biomarker: PMID: 33005239. hyperinsulinemia causes resistance to EGFR inhibitor (gefitinib) PMID: 32963612. An EGRF ligand is amphiregulin (induced by High fat feeding) PMID: 32135161. Pro inflammatory RHBDF2 (iRHOM2) promotes i…	No	Kinase	77.23		81.73	21.74	0	89.51	50.74	75.31	0	68.24	95.88
n-Oleoylethanolamine	BRD-K66956375	LINCSCP_20485	BOWVQLFMWHZBEF-KTKRTIGZSA-N	5283454	CHEMBL280065	CCCCCCCC\C=C/CCCCCCCC(=O)NCCO	CCCCCCCC/C=C\CCCCCCCC(=O)NCCO	n-Oleoylethanolamine	oleoylethanolamide	oleoylethanolamide	CNR1	Cannabinoid	CNR1, GPR119, GPR55, KCND3, PPARA, TRPV1	Oleylethanolamide (OEA) is a natural analog of the endogenous cannabinoid anandamide.	No		-73.85		76.77	42.1	16.33	-94.7	-54.68	-94.71	0	21.97	-95.25
2-(2,5-Dimethylphenyl)-6-fluoro-1,2-benzothiazol-3-one	BRD-K67258146	LINCSCP_16686	GRGDWLDSVPJEJU-UHFFFAOYSA-N	1510389	CHEMBL1725120	Cc1ccc(C)c(c1)-n1sc2cc(F)ccc2c1=O	Cc1ccc(C)c(-n2sc3cc(F)ccc3c2=O)c1	2-(2,5-Dimethylphenyl)-6-fluoro-1,2-benzothiazol-3-one	MLS0315771	BRD-K67258146	MPI, PHOSPHO1	Metabolic	MPI, PHOSPHO1	MPI enables cells to transform M6P into F6P, which can then be entered into Glycolysis	No		74.95		-80.91	64.63	-68.24	69.58	-82.32	0	87.63	78.72	0
4-(4-(Benzo[d][1,3]dioxol-5-yl)-5-(pyridin-2-yl)-1H-imidazol-2-yl)benzamide	BRD-K67298865	LINCSCP_14121	FHYUGAJXYORMHI-UHFFFAOYSA-N	4521392	CHEMBL440084	NC(=O)c1ccc(cc1)-c1nc(c([nH]1)-c1ccccn1)-c1ccc2OCOc2c1	NC(=O)c1ccc(-c2nc(-c3ccc4c(c3)OCO4)c(-c3ccccn3)[nH]2)cc1	4-(4-(Benzo[d][1,3]dioxol-5-yl)-5-(pyridin-2-yl)-1H-imidazol-2-yl)benzamide	SB-431542	SB-431542	TGFBR1	TGFB Receptor inhibitor	TGFBR1, ACVR1C, ACVR1B	"Transcriptome analyses of the insulin response, in the absence or presence of a TGF-β receptor kinase inhibitor, revealed substantial positive and negative contributions of autocrine TGF-β signaling in insulin-responsive gene responses" PMID: 31740700	No	kinase	73.26		90.85	70.92	80.88	50.62	60.71	43.5	0	61.08	-46.94
Ku-0063794	BRD-K67566344	LINCSCP_1000	RFSMUFRPPYDYRD-CALCHBBNSA-N	16736978	CHEMBL1078983	COc1ccc(cc1CO)-c1ccc2c(nc(nc2n1)N1C[C@H](C)O[C@H](C)C1)N1CCOCC1	COc1ccc(-c2ccc3c(N4CCOCC4)nc(N4C[C@H](C)O[C@H](C)C4)nc3n2)cc1CO	Ku-0063794	KU-0063794	KU-0063794	MTOR	MTOR	3nM MTOR; 600nM MLST8/RPTOR		Yes	kinase	97.73	97.17	92.61	98.05	98.9	22.88	99.02	99.73	92.48	99.48	66.9
(E)-5-(1-(2-Hydroxyethyl)-3-(pyridin-4-yl)-1H-pyrazol-4-yl)-2,3-dihydro-1H-inden-1-one oxime	BRD-K67578145	LINCSCP_100974	DEZZLWQELQORIU-RELWKKBWSA-N	11717001	CHEMBL525191	OCCn1cc(c(n1)-c1ccncc1)-c1ccc2c(CC\C2=N/O)c1	OCCn1cc(-c2ccc3c(c2)CCC3=NO)c(-c2ccncc2)n1	(E)-5-(1-(2-Hydroxyethyl)-3-(pyridin-4-yl)-1H-pyrazol-4-yl)-2,3-dihydro-1H-inden-1-one oxime	GDC-0879	GDC-0879	BRAF	RAF inhibitor	BRAF	RAF1 increased in obese IR PMID: 17986714. Interacts with insulin signalling PMID: 32982400. Listed as a AKT1 substrate. Part of RAF to EMK to MAPK cascade (? Where MAPK feedback inhibits RAF). RAF inhibitors can block MAPK signalling but context specific (activate the RAF-MEK-ERK pathway in a RAS-dependent manner,). PMID: 20130577	No	kinase	92.81		74.05	-84.21	89.05	97.92	46.36	89.47	0	-99.82	0
Pevonedistat	BRD-K67844266	LINCSCP_1002	MPUQHZXIXSTTDU-QXGSTGNESA-N	16720766	CHEMBL1231160	NS(=O)(=O)OC[C@@H]1C[C@H](C[C@@H]1O)n1ccc2c(N[C@H]3CCc4ccccc34)ncnc12	NS(=O)(=O)OC[C@@H]1C[C@@H](n2ccc3c(N[C@H]4CCc5ccccc54)ncnc32)C[C@@H]1O	Pevonedistat	MLN-4924	MLN-4924	NAE1	Protein	NAE1, UBA3	Pevonedistat	No		-92.22		-48.65	-63.23	-53.35	-70.66	-90.68	0	-84.14	-91.96	-96.73
PI-103	BRD-K67868012	LINCSCP_1003	TUVCWJQQGGETHL-UHFFFAOYSA-N	9884685	CHEMBL573339	Oc1cccc(c1)-c1nc(N2CCOCC2)c2oc3ncccc3c2n1	Oc1cccc(-c2nc(N3CCOCC3)c3oc4ncccc4c3n2)c1	PI-103	PI-103	PI-103	PIK3CA	PI3K	<1nM PIK3CA, 2nM PIK3CB, 2nM PRKDC, 2nM PIK3R1, 5nM MTOR		Yes	kinase	95.42	97.6	91.18	16.41	89.77	48.09	51.6	97.15	28.37	86.29	0
MK-2206	BRD-K68065987	LINCSCP_1004	ULDXWLCXEDXJGE-UHFFFAOYSA-N	24964624	CHEMBL1079175	NC1(CCC1)c1ccc(cc1)-c1nc2ccn3c(n[nH]c3=O)c2cc1-c1ccccc1	NC1(c2ccc(-c3nc4ccn5c(=O)[nH]nc5c4cc3-c3ccccc3)cc2)CCC1	MK-2206	MK-2206	MK-2206	AKT1/GLI3	AKT/shh	AKT1, AKT2, AKT3; 110nM GLI3		Yes	kinase	77.27	86.62	66.11	31.03	46.84	46.36	85.11	49.25	67.61	88.88	82.56
Torin 2	BRD-K68174511	LINCSCP_11058	GUXXEUUYCAYESJ-UHFFFAOYSA-N	51358113	CHEMBL1765602	Nc1ccc(cn1)-c1ccc2ncc3ccc(=O)n(-c4cccc(c4)C(F)(F)F)c3c2c1	Nc1ccc(-c2ccc3ncc4ccc(=O)n(-c5cccc(C(F)(F)F)c5)c4c3c2)cn1	Torin 2	torin-2	torin-2	MTOR	MTOR	<1nM MTOR, <1nM PRKDC, 5nM PIK3R1, PIK3CA, PIK3CG		Yes	kinase	79.05	99.4	21.61	19.07	79.49	66.84	80.34	83.34	0	77.01	-59.81
Trichostatin A	BRD-K68202742	LINCSCP_10771	RTKIYFITIVXBLE-QEQCGCAPSA-N	444732	CHEMBL99	C[C@H](\C=C(C)\C=C\C(=O)NO)C(=O)c1ccc(cc1)N(C)C	CC(=CC(C)C=CC(O)=NO)C(=O)c1ccc(N(C)C)cc1	Trichostatin A	trichostatin-a	trichostatin-a	HDAC7	HDAC inhibitor	HDAC7, HDAC8, HDAC1, HDAC10, HDAC2, HDAC3, HDAC4, HDAC5, HDAC6, HDAC9		No		-79.52		0	-89.43	0	0	-54.08	-93.15	-70.48	-83.12	0
2,2-Dimethylpropanoic acid [[1-[bis[(2,2-dimethyl-1-oxopropoxy)methoxy]phosphoryl]-1-(4-hydroxyphenoxy)ethyl]-[(2,2-dimethyl-1-oxopropoxy)methoxy]phosphoryl]oxymethyl ester	BRD-K69328504	LINCSCP_1007	LOTSPVPQHAUHCE-UHFFFAOYSA-N	5132514	CHEMBL1356422	CC(C)(C)C(=O)OCOP(=O)(OCOC(=O)C(C)(C)C)C(C)(Oc1ccc(O)cc1)P(=O)(OCOC(=O)C(C)(C)C)OCOC(=O)C(C)(C)C	CC(C)(C)C(=O)OCOP(=O)(OCOC(=O)C(C)(C)C)C(C)(Oc1ccc(O)cc1)P(=O)(OCOC(=O)C(C)(C)C)OCOC(=O)C(C)(C)C	2,2-Dimethylpropanoic acid [[1-[bis[(2,2-dimethyl-1-oxopropoxy)methoxy]phosphoryl]-1-(4-hydroxyphenoxy)ethyl]-[(2,2-dimethyl-1-oxopropoxy)methoxy]phosphoryl]oxymethyl ester	L-690488	L-690488	IMPA1	Metabolic	IMPA1		No		77.11		95.23	-41.47	64.6	0	92.68	97.53	26.52	28.1	0
N-[4-[3-[[[7-(Hydroxyamino)-7-oxoheptyl]amino]-oxomethyl]-5-isoxazolyl]phenyl]carbamic acid tert-butyl ester	BRD-K69840642	LINCSCP_1008	WWGBHDIHIVGYLZ-UHFFFAOYSA-N	24951314	CHEMBL511749	CC(C)(C)OC(=O)Nc1ccc(cc1)-c1cc(no1)C(=O)NCCCCCCC(=O)NO	CC(C)(C)OC(=O)Nc1ccc(-c2cc(C(=O)NCCCCCCC(O)=NO)no2)cc1	N-[4-[3-[[[7-(Hydroxyamino)-7-oxoheptyl]amino]-oxomethyl]-5-isoxazolyl]phenyl]carbamic acid tert-butyl ester	ISOX	ISOX	HDAC6	HDAC inhibitor	HDAC6		No		-90.76		-52.25	-91.72	-77.43	-53.41	-96.21	-61.79	-38.1	-97.11	0
[5-[2,4-Bis((3S)-3-methylmorpholin-4-yl)pyrido[2,3-d]pyrimidin-7-yl]-2-methoxyphenyl]methanol	BRD-K69932463	LINCSCP_1009	KVLFRAWTRWDEDF-IRXDYDNUSA-N	25262965	CHEMBL1801204	COc1ccc(cc1CO)-c1ccc2c(nc(nc2n1)N1CCOC[C@@H]1C)N1CCOC[C@@H]1C	COc1ccc(-c2ccc3c(N4CCOC[C@@H]4C)nc(N4CCOC[C@@H]4C)nc3n2)cc1CO	[5-[2,4-Bis((3S)-3-methylmorpholin-4-yl)pyrido[2,3-d]pyrimidin-7-yl]-2-methoxyphenyl]methanol	AZD-8055	AZD-8055	MTOR	MTOR	5nM mTOR, 5uM > PIK3		Yes	kinase	98.34	98.2	97.59	98.81	99.86	48.32	99.49	99.43	95.6	98.65	90.39
Erlotinib	BRD-K70401845	LINCSCP_108797	AAKJLRGGTJKAMG-UHFFFAOYSA-N	176870	CHEMBL553	COCCOc1cc2ncnc(Nc3cccc(c3)C#C)c2cc1OCCOC	C#Cc1cccc(Nc2ncnc3cc(OCCOC)c(OCCOC)cc23)c1	Erlotinib	erlotinib	erlotinib	EGFR	Tyrosine kinase Receptor	0.3nM ERBB3, 0.5nM EGFR inhibitor, 2.7nM ERBB4, 3nM GAK	Cell membrane (EGF signalling) and Nuclear role (DNA-PK) IR and EGFR activation and negative cooperativity PMID: 32297376. soluble EGFR described as a T2DM and hepatic IR biomarker: PMID: 33005239. hyperinsulinemia causes resistance to EGFR inhibitor (gefitinib) PMID: 32963612. An EGRF ligand is amphiregulin (induced by High fat feeding) PMID: 32135161. Pro inflammatory RHBDF2 (iRHOM2) promotes i…	Yes	Kinase	72.33		82.84	73.89	89.86	0	74.48	0	61.63	0	-97.93
Falnidamol	BRD-K70914287	LINCSCP_108815	FTFRZXFNZVCRSK-UHFFFAOYSA-N	6918508	CHEMBL258940	CN1CCC(CC1)Nc1ncc2ncnc(Nc3ccc(F)c(Cl)c3)c2n1	CN1CCC(Nc2ncc3ncnc(Nc4ccc(F)c(Cl)c4)c3n2)CC1	Falnidamol	BIBX-1382	BIBX-1382	EGFR	Tyrosine kinase Receptor	<1nM EGFR	Cell membrane (EGF signalling) and Nuclear role (DNA-PK) IR and EGFR activation and negative cooperativity PMID: 32297376. soluble EGFR described as a T2DM and hepatic IR biomarker: PMID: 33005239. hyperinsulinemia causes resistance to EGFR inhibitor (gefitinib) PMID: 32963612. An EGRF ligand is amphiregulin (induced by High fat feeding) PMID: 32135161. Pro inflammatory RHBDF2 (iRHOM2) promotes i…	Yes	Kinase	82.43		87.35	56.51	86.51	0	89.78	90.4	17.05	13.77	-33.96
N-(3-(5-Chloro-2-(2-methoxy-4-(4-methylpiperazin-1-yl)phenylamino)pyrimidin-4-yloxy)phenyl)acrylamide	BRD-K72420232	LINCSCP_100324	ITTRLTNMFYIYPA-UHFFFAOYSA-N	44607530	CHEMBL1229592	COc1cc(ccc1Nc1ncc(Cl)c(Oc2cccc(NC(=O)C=C)c2)n1)N1CCN(C)CC1	C=CC(=O)Nc1cccc(Oc2nc(Nc3ccc(N4CCN(C)CC4)cc3OC)ncc2Cl)c1	N-(3-(5-Chloro-2-(2-methoxy-4-(4-methylpiperazin-1-yl)phenylamino)pyrimidin-4-yloxy)phenyl)acrylamide	WZ-4002	WZ-4002	EGFR	Tyrosine kinase Receptor	<1nM EGFR	Cell membrane (EGF signalling) and Nuclear role (DNA-PK) IR and EGFR activation and negative cooperativity PMID: 32297376. soluble EGFR described as a T2DM and hepatic IR biomarker: PMID: 33005239. hyperinsulinemia causes resistance to EGFR inhibitor (gefitinib) PMID: 32963612. An EGRF ligand is amphiregulin (induced by High fat feeding) PMID: 32135161. Pro inflammatory RHBDF2 (iRHOM2) promotes i…	Yes	Kinase	78.77		-15.02	84.1	20.99	0	94.11	76.09	40.47	12.37	92.76
Arcyriaflavin a	BRD-K72726508	LINCSCP_11201	KAJXOWFGKYKMMZ-UHFFFAOYSA-N	5327723	CHEMBL268368	O=C1NC(=O)c2c1c1c3ccccc3[nH]c1c1[nH]c3ccccc3c21	O=C1NC(=O)c2c1c1c3ccccc3[nH]c1c1[nH]c3ccccc3c21	Arcyriaflavin a	arcyriaflavin-a	arcyriaflavin-a	CCND1	Cell Cycle	CCND1, CCNE1, CDK2, CDK4		Yes	kinase	69.67		55.84	0	50.51	-88.18	83.6	97.9	76.9	42.59	-33.89
(2R)-N-Hydroxy-3-methyl-2-[(4-phenylphenyl)sulfonyl-propan-2-yloxyamino]butanamide	BRD-K73395020	LINCSCP_1015	DGZZVIWCMGVHGV-LJQANCHMSA-N	11292680	CHEMBL179288	CC(C)ON([C@H](C(C)C)C(=O)NO)S(=O)(=O)c1ccc(cc1)c2ccccc2	CC(C)ON(C(C(O)=NO)C(C)C)S(=O)(=O)c1ccc(-c2ccccc2)cc1	(2R)-N-Hydroxy-3-methyl-2-[(4-phenylphenyl)sulfonyl-propan-2-yloxyamino]butanamide	SA-1478088	SA-1478088	MMP12	Proteasome inhibitor	MMP12, MMP14, MMP2, MMP8, MMP9		No		-67.01		-58.98	6.19	-69.07	-91.99	-56.9	-71.76	-27.23	-85.74	-73.35
N-[3,5-Bis(trifluoromethyl)phenyl]-5-chloro-2-hydroxybenzamide	BRD-K74305673	LINCSCP_1018	CHILCFMQWMQVAL-UHFFFAOYSA-N	5081913	CHEMBL536151	Oc1ccc(Cl)cc1C(=O)Nc1cc(cc(c1)C(F)(F)F)C(F)(F)F	O=C(Nc1cc(C(F)(F)F)cc(C(F)(F)F)c1)c1cc(Cl)ccc1O	N-[3,5-Bis(trifluoromethyl)phenyl]-5-chloro-2-hydroxybenzamide	IKK-2-inhibitor-V	IKK-2-inhibitor-V	IKBKB	IKK inhibitor, NFkB pathway inhibitor	IKBKB		Yes		-61.37	74.29	-34.95	-70.89	14.68	37.86	-63.32	-54.53	-8.23	-89	31.97
(3Z,5E)-3,5-Bis[(4-methylphenyl)methylidene]piperidin-4-one	BRD-K74402642	LINCSCP_1019	PKCYYPHSCUSQDK-UHWBUFEVSA-N	6477762	CHEMBL1433926	Cc1ccc(/C=C/2\CNC/C(=C/c3ccc(C)cc3)/C2=O)cc1	Cc1ccc(/C=C2/CNC/C(=C\c3ccc(C)cc3)C2=O)cc1	(3Z,5E)-3,5-Bis[(4-methylphenyl)methylidene]piperidin-4-one	NSC-632839	NSC-632839	USP2	Protease	USP2, USP7, SENP2, USP1		No		-70.04		-55.49	-82.11	-29.29	-20.46	-40.54	-73.03	-89.24	-36.11	-67.58
(E)-8-(2-(4-(Diphenylamino)benzylidene)hydrazinyl)-N-hydroxy-8-oxooctanamide	BRD-K74761218	LINCSCP_10783	KXWWYFKVBFUVIZ-SGWCAAJKSA-N	44601455	No result	ONC(=O)CCCCCCC(=O)N/N=C/c1ccc(cc1)N(c2ccccc2)c3ccccc3	O=C(CCCCCCC(O)=NO)N/N=C/c1ccc(N(c2ccccc2)c2ccccc2)cc1	(E)-8-(2-(4-(Diphenylamino)benzylidene)hydrazinyl)-N-hydroxy-8-oxooctanamide	WT-171	WT-171	HDAC6	HDAC inhibitor	HDAC6		No		-90.77	-74.94	-71.98	-91.82	0	-25.47	-64.55	0	-96.35	-94.2	NaN
Alisertib	BRD-K75295174	LINCSCP_10127	ZLHFILGSQDJULK-UHFFFAOYSA-N	24771867	CHEMBL483158	COc1cc(Nc2ncc3CN=C(c4cc(Cl)ccc4-c3n2)c2c(F)cccc2OC)ccc1C(O)=O	COc1cc(Nc2ncc3c(n2)-c2ccc(Cl)cc2C(c2c(F)cccc2OC)=NC3)ccc1C(=O)O	Alisertib	alisertib	alisertib	AURKA	Aurora kinase inhibitor	AURKA		Yes	kinase	-89.79		-56.98	NaN	-88.46	-68.23	-32	-72.26	0	-68.51	-99.58
2-((6-Amino-9H-purin-9-yl)methyl)-5-methyl-3-o-tolylquinazolin-4(3H)-one	BRD-K75430629	LINCSCP_17001	GNWHRHGTIBRNSM-UHFFFAOYSA-N	9908783	CHEMBL1213082	Cc1ccccc1n2c(Cn3cnc4c(N)ncnc34)nc5cccc(C)c5c2=O	Cc1ccccc1-n1c(Cn2cnc3c(N)ncnc32)nc2cccc(C)c2c1=O	2-((6-Amino-9H-purin-9-yl)methyl)-5-methyl-3-o-tolylquinazolin-4(3H)-one	IC-87114	BRD-K75430629	PIK3CD	PI3K	12nM PIK3R1, 12nM PIK3CD	"Inhibition of class I phosphoinositide 3-kinase activity impairs proliferation and triggers apoptosis " PMID: 19176369	Yes	kinase	88.42		93.61	-8.31	98.7	71.9	95.53	40.18	46.96	39.03	NaN
n/a	BRD-K76425766	LINCSCP_1219	No result	No result	No result	Oc1nc(SCc2ccc(Cl)cc2)nc3CCCc31	O=c1[nH]c(SCc2ccc(Cl)cc2)nc2c1CCC2	n/a	BRD-K76425766	n/a	Unknown	Proteinase inhibitor	Unknown	"proteasomal dysfunction and impaired proteostasis in adipocytes, resulting from protein oxidation and/or misfolding, constitute major pathogenic mechanisms in the development of IR in obesity" PMID: 25714483	No		93.07		0	93.56	-34.71	61.77	93.87	99.5	-40	20.56	NaN
Omacetaxine mepesuccinate	BRD-K76674262	LINCSCP_109997	HYFHYPWGAURHIV-JFIAXGOJSA-N	285033	CHEMBL46286	COC(=O)C[C@](O)(CCCC(C)(C)O)C(=O)O[C@H]1[C@H]2c3cc4OCOc4cc3CCN3CCC[C@]23C=C1OC	COC(=O)C[C@](O)(CCCC(C)(C)O)C(=O)O[C@@H]1C(OC)=C[C@]23CCCN2CCc2cc4c(cc2[C@H]13)OCO4	Omacetaxine mepesuccinate	homoharringtonine	homoharringtonine	RPL3	Protein synthesis inhibitor	RPL3		No		77.82	91.62	89.11	NaN	53.24	24.51	57.79	71.01	-64.18	0	76.25
6-Phenyl-N-[(3-phenylphenyl)methyl]-3-(2-pyridinyl)-1,2,4-triazin-5-amine	BRD-K76907295	LINCSCP_1426	MWRDNBONCUGSBY-UHFFFAOYSA-N	46742354	CHEMBL2135309	C(Nc1nc(nnc1-c1ccccc1)-c1ccccn1)c1cccc(c1)-c1ccccc1	c1ccc(-c2cccc(CNc3nc(-c4ccccn4)nnc3-c3ccccc3)c2)cc1	6-Phenyl-N-[(3-phenylphenyl)methyl]-3-(2-pyridinyl)-1,2,4-triazin-5-amine	VU0418947-1	VU0418947-1	HIF1A	HIF activator	HIF1A		No		-70.93		-55.16	0	-66.63	0	NaN	0	-81.74	-43.54	-84.87
Methyl 4-(6-(4-(methoxycarbonylamino)phenyl)-4-morpholino-1H-pyrazolo[3,4-d]pyrimidin-1-yl)piperidine-1-carboxylate	BRD-K77008974	LINCSCP_11072	IMXHGCRIEAKIBU-UHFFFAOYSA-N	44219749	CHEMBL561708	COC(=O)Nc1ccc(cc1)-c1nc(N2CCOCC2)c2cnn(C3CCN(CC3)C(=O)OC)c2n1	COC(=O)Nc1ccc(-c2nc(N3CCOCC3)c3cnn(C4CCN(C(=O)OC)CC4)c3n2)cc1	Methyl 4-(6-(4-(methoxycarbonylamino)phenyl)-4-morpholino-1H-pyrazolo[3,4-d]pyrimidin-1-yl)piperidine-1-carboxylate	WYE-354	WYE-354	MTOR	MTOR	4nM MTOR, 1uM PIK3CA		Yes	kinase	93.15	97.32	91.97	42.81	47.16	76.35	88.6	0	92.45	97.96	0
Reversine	BRD-K77286328	LINCSCP_11073	ZFLJHSQHILSNCM-UHFFFAOYSA-N	210332	CHEMBL188343	C1CCC(CC1)Nc2nc(Nc3ccc(cc3)N4CCOCC4)nc5[nH]cnc25	c1nc2c(NC3CCCCC3)nc(Nc3ccc(N4CCOCC4)cc3)nc2[nH]1	Reversine	reversine	reversine	TTK	TTK/Aurora inhibitor	AURKB, ADORA3, AURKA, INCENP, MAP2K1	AK-b, AK-a, TKK nanomolar inhibitor. TTK - AKT1 downstream mediator of PAK1-TTK genetic interaction PMID: 33060198. Aurora kinase (serine/threonine kinase). TTK siRNA increases autophagy and promotes tumor senescence PMID: 27618777. Inhibition of Aurora-A improves insulin resistance PMID: 33043822	Yes	kinase	93.87		98.86	8.36	71.36	64.13	94.62	66.55	94.37	88.92	87.69
Entinostat	BRD-K77908580	LINCSCP_100586	INVTYAOGFAGBOE-UHFFFAOYSA-N	4261	CHEMBL27759	Nc1ccccc1NC(=O)c1ccc(CNC(=O)OCc2cccnc2)cc1	Nc1ccccc1NC(=O)c1ccc(CNC(=O)OCc2cccnc2)cc1	Entinostat	entinostat	entinostat	HDAC1	HDAC inhibitor	HDAC1, HDAC2, HDAC3, HDAC9		No		-97		-79.14	-91.14	-98.95	0	-7.77	0	26.75	-99.36	-96.16
Mebendazole	BRD-K77987382	LINCSCP_106334	OPXLLQIJSORQAM-UHFFFAOYSA-N	4030	CHEMBL685	COC(=O)Nc1nc2ccc(cc2[nH]1)C(=O)c1ccccc1	COC(=O)Nc1nc2cc(C(=O)c3ccccc3)ccc2[nH]1	Mebendazole	mebendazole	mebendazole	TUBA1A	Tubulin inhibitor	TUBA1A, TUBB, TUBB4B		No		-98.45	71.11	-97.83	-42.85	-45.29	-95.04	-99.34	3.91	-97.23	-81.53	-99.41
1-Tert-butyl-3-(naphthalen-1-ylmethyl)-1H-pyrazolo[3,4-d]pyrimidin-4-amine	BRD-K78278890	LINCSCP_1845	GDQXJQSQYMMKRA-UHFFFAOYSA-N	5154691	CHEMBL573578	CC(C)(C)n1nc(Cc2cccc3ccccc23)c4c(N)ncnc14	CC(C)(C)n1nc(Cc2cccc3ccccc23)c2c(N)ncnc21	1-Tert-butyl-3-(naphthalen-1-ylmethyl)-1H-pyrazolo[3,4-d]pyrimidin-4-amine	NM-PP1	NM-PP1	CAMK2A	Calcium	CAMK2A, LCK, MAPK8, PRKACA, RIPK2, SRC	PMID: 26068544 loss of MK2 (MAPKAPK2) improves metabolism in obese mice by enhacning insulin signalling. PMID: 27993520 (NM)-PP1, blocks βCaMKII overexpression impairs behavioral flexibility	Yes	kinase	79.08		0	68.28	0	0	-65.8	-74.5	82.44	93.45	72.97
n/a	BRD-K78373679	LINCSCP_17005	XOLMRFUGOINFDQ-YBEGLDIGSA-N	11631681	CHEMBL393929	O=C1N=C(NCc2cccs2)S\C1=C/c1ccc2ncccc2c1	O=C1N=C(NCc2cccs2)S/C1=C\c1ccc2ncccc2c1	n/a	RO-3306	Ro-3306	CDK1	Cell Cycle	CDK1		Yes	kinase	95.98	95.54	52.89	96.1	99.29	53.57	93.19	96.39	0	0	NaN
Ixazomib	BRD-K78659596	LINCSCP_1023	MXAYKZJJDUDWDS-LBPRGKRZSA-N	25183872	CHEMBL2141296	CC(C)C[C@H](NC(=O)CNC(=O)c1cc(Cl)ccc1Cl)B(O)O	CC(C)C[C@H](NC(=O)CNC(=O)c1cc(Cl)ccc1Cl)B(O)O	Ixazomib	MLN-2238	MLN-2238	PSMB1	Proteasome inhibitor	PSMB1		No		-86.6		-65.58	-84.78	0	0	-24.29	-29.84	-82.42	-95.77	-91.25
Gabazine	BRD-K79905821	LINCSCP_378	ACVGNKYJVGNLIL-UHFFFAOYSA-N	107896	CHEMBL32503	COc1ccc(cc1)-c1ccc(=N)n(CCCC(O)=O)n1	COc1ccc(-c2ccc(=N)n(CCCC(=O)O)n2)cc1	Gabazine	gabazine	gabazine	GABRA1	GABA	GABRA1, GABRA2, GABRA3, GABRA4, GABRA5, GABRA6, GABRG2	Gaba neurons involved in metabolic signalling PMID: 16553787	No		-81.42		-87.82	31.37	0	64.49	-88.74	-92.87	-46.62	68.73	NaN
Cephaeline	BRD-K80348542	LINCSCP_11322	DTGZHCFJNDAHEN-OZEXIGSWSA-N	442195	CHEMBL255708	CC[C@H]1CN2CCc3cc(OC)c(OC)cc3[C@@H]2C[C@@H]1C[C@H]4NCCc5cc(O)c(OC)cc45	CC[C@H]1CN2CCc3cc(OC)c(OC)cc3[C@@H]2C[C@@H]1C[C@H]1NCCc2cc(O)c(OC)cc21	Cephaeline	cephaeline	cephaeline	RPS2	Protein synthesis inhibitor	RPS2	protein synthesis inhibitor	No	kinase	76.82	96.97	95.83	NaN	80.24	40.84	69.41	51.51	0	-49.47	39.77
Taurocholic acid	BRD-K81062487	LINCSCP_11079	WBWWGRHZICKQGZ-HZAMXZRMSA-N	6675	CHEMBL224867	C[C@H](CCC(=O)NCCS(=O)(=O)O)[C@H]1CC[C@H]2[C@@H]3[C@H](O)C[C@@H]4C[C@H](O)CC[C@]4(C)[C@H]3C[C@H](O)[C@]12C	C[C@H](CCC(=O)NCCS(=O)(=O)O)[C@H]1CC[C@H]2[C@H]3[C@H](C[C@H](O)[C@@]21C)[C@@]1(C)CC[C@@H](O)C[C@H]1C[C@H]3O	Taurocholic acid	taurocholic-acid	taurocholic-acid	CEL	Farnesoid	CEL, FXR, NR1H4, FABP6, SLCO1C1	Bile acid treatment and FXR agonism PMID: 32003602	No		73.48		98.82	86.26	0	55.32	-82.64	0	78.04	-36.76	-39.04
Vorinostat	BRD-K81418486	LINCSCP_100062	WAEXFXRVDQXREF-UHFFFAOYSA-N	5311	CHEMBL98	ONC(=O)CCCCCCC(=O)Nc1ccccc1	O=C(CCCCCCC(O)=NO)Nc1ccccc1	Vorinostat	vorinostat	vorinostat	HDAC1	HDAC inhibitor	HDAC1, HDAC2, HDAC3, HDAC6, HDAC8, HDAC10, HDAC11, HDAC5, HDAC9		No		-83.25	-83.58	0	-84.96	-12.62	0	-46.92	-80.88	-75	-86.26	-84.43
Lomibuvir	BRD-K81783531	LINCSCP_16711	WPMJNLCLKAKMLA-UHFFFAOYSA-N	24798764	CHEMBL3182952	CC1CCC(CC1)C(=O)N(C1CCC(O)CC1)c1cc(sc1C(O)=O)C#CC(C)(C)C	CC1CCC(C(=O)N(c2cc(C#CC(C)(C)C)sc2C(=O)O)C2CCC(O)CC2)CC1	Lomibuvir	Lomibuvir	VX-222	Unknown	RNA			No		-88	-69.61	98.48	-91.1	-85.04	-39.22	-63.94	-90.5	89.28	-34.92	0
N-(2-Phenylphenyl)-8-[4-(3-pyridinyl)-1-triazolyl]octanamide	BRD-K83289131	LINCSCP_1034	SJOLTIOPWDLDEB-UHFFFAOYSA-N	44819697	CHEMBL568305	O=C(CCCCCCCn1cc(nn1)-c1cccnc1)Nc1ccccc1-c1ccccc1	O=C(CCCCCCCn1cc(-c2cccnc2)nn1)Nc1ccccc1-c1ccccc1	N-(2-Phenylphenyl)-8-[4-(3-pyridinyl)-1-triazolyl]octanamide	CAY-10618	CAY-10618	NAMPT	NAMPT	NAMPT	Drug is GPP78 PMID: 28165742, PMID: 27229177 NAMPT (VISFATIN) knockdown attenuates atherosclerosis and promotes reverse cholesterol transport in ApoE KO mice with high-fat-induced insulin resistance. Chemistry PMID: 21080724	No		82.94		46.14	85.92	97.1	0	56.97	0	69.94	81.66	-75.71
2-[4-[(4-Ethyl-1-piperazinyl)methyl]-3-(trifluoromethyl)anilino]-5,11-dimethyl-6-pyrimido[4,5-b][1,4]benzodiazepinone	BRD-K83972459	LINCSCP_100812	PXGLIUGVLBRUBV-UHFFFAOYSA-N	57340671	No result	CCN1CCN(Cc2ccc(Nc3ncc4N(C)C(=O)c5ccccc5N(C)c4n3)cc2C(F)(F)F)CC1	CCN1CCN(Cc2ccc(Nc3ncc4c(n3)N(C)c3ccccc3C(=O)N4C)cc2C(F)(F)F)CC1	2-[4-[(4-Ethyl-1-piperazinyl)methyl]-3-(trifluoromethyl)anilino]-5,11-dimethyl-6-pyrimido[4,5-b][1,4]benzodiazepinone	JWE-035	JWE-035	AURKA	Aurora kinase inhibitor	AURKA		No	kinase	-70.36		45.86	-75.35	-91.42	96.71	21.5	-70	-92.7	8.15	0
Testosterone	BRD-K84036904	LINCSCP_1939	MUMGGOZAMZWBJJ-DYKIIFRCSA-N	6013	CHEMBL386630	C[C@]1(O)CC[C@H]2[C@@H]3CCC4=CC(=O)CC[C@]4(C)[C@H]3CC[C@]12C	C[C@]1(O)CC[C@H]2[C@@H]3CC=C4CC(=O)CC[C@]4(C)[C@H]3CC[C@@]21C	Testosterone	testosterone	testosterone	AR	Steriod	AR, CYP19A1, CYP2C19, CYP2C8, CYP3A5		No		-81.36		-95.87	-67.68	0	-98.54	0	NaN	0	-62.16	NaN
(5R)-9-Chloro-5-phenyl-2,3,4,5-tetrahydro-1H-3-benzazepine-7,8-diol	BRD-K84421793	LINCSCP_11329	GHWJEDJMOVUXEC-CYBMUJFWSA-N	12668019	CHEMBL1160787	Oc1cc2[C@H](CNCCc2c(Cl)c1O)c3ccccc3	Oc1cc2c(c(Cl)c1O)CCNC[C@@H]2c1ccccc1	(5R)-9-Chloro-5-phenyl-2,3,4,5-tetrahydro-1H-3-benzazepine-7,8-diol	BRD-K84421793	Biomol-NT_000029	DRD1	Dopamine	DRD1		No	kinase	70.52		91.52	0	85.22	85.29	68.63	-27.25	63.6	42.29	49.78
Bmy 45778	BRD-K84895041	LINCSCP_15092	DSRSEEYZGWTODH-UHFFFAOYSA-N	127861	CHEMBL125569	OC(=O)COc1cccc(c1)-c1ocnc1-c1nc(c(o1)-c1ccccc1)-c1ccccc1	O=C(O)COc1cccc(-c2ocnc2-c2nc(-c3ccccc3)c(-c3ccccc3)o2)c1	Bmy 45778	BMY-45778	BMY-45778	PTGIR	Inflammatory	PTGIR		No		-85.32	-76.27	-74.35	-30.54	-79.21	42.97	-80.29	-92.75	-25.76	34.82	NaN
Perospirone	BRD-K85503079	LINCSCP_31826	FBVFZWUMDDXLLG-HDICACEKSA-N	115368	CHEMBL1472975	O=C1[C@H]2CCCC[C@H]2C(=O)N1CCCCN1CCN(CC1)c1nsc2ccccc12	Oc1c2c(c(O)n1CCCCN1CCN(c3nsc4ccccc34)CC1)CCCC2	Perospirone	perospirone	perospirone	DRD2	Dopamine	DRD2, HTR2A, DRD3, DRD4, HTR2C		No		75.77		34.3	68.29	93.91	80.96	-79.11	NaN	0	59.26	NaN
Zalcitabine	BRD-K85925969	LINCSCP_141431	WREGKURFCTUGRC-POYBYMJQSA-N	24066	CHEMBL853	Nc1ccn([C@H]2CC[C@@H](CO)O2)c(=O)n1	Nc1ccn([C@H]2CC[C@@H](CO)O2)c(=O)n1	Zalcitabine	zalcitabine	zalcitabine	Unknown	Nucleoside RT inhibitor	Unknown	Potential Class effect on IR: See PMID: 19898246. zalcitabine preferentially inhibits the gamma form of DNA polymerase present in tumor cell mitochondria, resulting in the inhibition of tumor cell mitochondrial DNA replication, nucleoside reverse transcriptase inhibitor, reverse transcriptase inhibitor	Yes	kinase	87.8		42.76	21.35	0	95.3	0	NaN	98.69	83.01	NaN
Flubendazole	BRD-K86003836	LINCSCP_1941	CPEUVMUXAHMANV-UHFFFAOYSA-N	35802	CHEMBL1454946	COC(=O)Nc1nc2cc(ccc2[nH]1)C(=O)c1ccc(F)cc1	COC(=O)Nc1nc2cc(C(=O)c3ccc(F)cc3)ccc2[nH]1	Flubendazole	flubendazole	flubendazole	TUBB	Tubulin inhibitor	TUBB		No		-97.7		-33.92	-97.14	-84.79	-93.99	0	NaN	-98.34	-95.91	NaN
Piperacillin	BRD-K86873305	LINCSCP_17015	IVBHGBMCVLDMKU-GXNBUGAJSA-N	43672	CHEMBL702	CCN1CCN(C(=O)N[C@@H](C(=O)N[C@H]2[C@H]3SC(C)(C)[C@@H](N3C2=O)C(O)=O)c2ccccc2)C(=O)C1=O	CCN1CCN(C(=O)NC(C(=O)NC2C(=O)N3C2SC(C)(C)C3C(=O)O)c2ccccc2)C(=O)C1=O	Piperacillin	Pipracil	piperacillin	Unknown	Antibacterial	Unknown		No		-80.26		30.82	0	-86.32	0	-89.69	-65.02	-87.14	-13.46	NaN
1H-Pyrazolo[3,4-b]quinoxalin-3-amine	BRD-K87932577	LINCSCP_13952	DWHVZCLBMTZRQM-UHFFFAOYSA-N	438981	CHEMBL259389	Nc1n[nH]c2nc3ccccc3nc12	Nc1[nH]nc2nc3ccccc3nc12	1H-Pyrazolo[3,4-b]quinoxalin-3-amine	CDK1-5-inhibitor	NSC-693868	CDK1	Cell Cycle	CDK1, CDK5, GSK3B		No	kinase	71.87	-71.23	81.17	36.49	0	68.36	-34.16	96.32	0	90.04	-74.23
N-Hydroxy-1-(4-methoxybenzyl)-1H-indole-6-carboxamide	BRD-K88742110	LINCSCP_13259	AJRGHIGYPXNABY-UHFFFAOYSA-N	24753719	CHEMBL2170177	COc1ccc(Cn2ccc3ccc(cc23)C(=O)NO)cc1	COc1ccc(Cn2ccc3ccc(C(O)=NO)cc32)cc1	N-Hydroxy-1-(4-methoxybenzyl)-1H-indole-6-carboxamide	BRD-K88742110	BRD-K88742110	HDAC8	HDAC inhibitor	HDAC8, IL1B		No		-80.37		-22.36	67.89	-92.28	54.65	0	-60.78	-90.57	26.3	-58.29
n/a	BRD-K88761633	LINCSCP_1642	No result	No result	No result	CCOC(=O)c1ccccc1S(=O)(=O)N1CCN(CC1)c1nc(nc2ccccc12)-c1cccs1	CCOC(=O)c1ccccc1S(=O)(=O)N1CCN(c2nc(-c3cccs3)nc3ccccc23)CC1	n/a	BRD-K88761633	n/a	GBA	Metabolic	GBA	2007 in vivo validation of target PMID: 17287460	No		92.95		67.82	98.52	96.08	43.57	NaN	82.42	-56.49	38.92	83.26
Biotin	BRD-K89210380	LINCSCP_11482	YBJHBAHKTGYVGT-ZKWXMUAHSA-N	171548	CHEMBL857	OC(=O)CCCC[C@@H]1SC[C@@H]2NC(=O)N[C@H]12	O=C(O)CCCC[C@@H]1SC[C@@H]2NC(=O)N[C@H]12	Biotin	biotin	biotin	ACACA	Metabolic	ACACA, ACACB, HLCS, MCCC1, MCCC2, PC, PCCA, PCCB, SLC5A6	vitamin cofactor for many metabolic reactions	No	kinase	84.66		-65.54	13.69	96.07	74.51	40.6	0	88.26	90.87	73.08
Chlorpromazine	BRD-K89997465	LINCSCP_11483	ZPEIMTDSQAKGNT-UHFFFAOYSA-N	2726	CHEMBL71	CN(C)CCCN1c2ccccc2Sc2ccc(Cl)cc12	CN(C)CCCN1c2ccccc2Sc2ccc(Cl)cc21	Chlorpromazine	chlorpromazine	chlorpromazine	DRD2	Dopamine	DRD2, ADRA2A, ADRA2B, ADRA2C, DRD1, DRD3, DRD4, DRD5, HRH1, HTR1A, HTR2A, HTR2C, HTR6, HTR7, ADRA1A, ADRA1B, ADRA1D, CALM1, CHRM1, CHRM3, HRH4, HTR2B, KCNH2, KIF11, ORM1, ORM2, SMPD1, TRPC5		Yes	kinase	80.87		84.29	85.73	0	97.46	19.12	19.31	35.78	-17.98	74.11
5-(5,6-Dimethoxy-1-benzimidazolyl)-3-[[2-(trifluoromethyl)phenyl]methoxy]-2-thiophenecarboxamide	BRD-K90382497	LINCSCP_10448	JSKUWFIZUALZLX-UHFFFAOYSA-N	9826308	CHEMBL514499	COc1cc2ncn(-c3cc(OCc4ccccc4C(F)(F)F)c(s3)C(N)=O)c2cc1OC	COc1cc2ncn(-c3cc(OCc4ccccc4C(F)(F)F)c(C(N)=O)s3)c2cc1OC	5-(5,6-Dimethoxy-1-benzimidazolyl)-3-[[2-(trifluoromethyl)phenyl]methoxy]-2-thiophenecarboxamide	GW-843682X	GW-843682X	PLK3, FLT4	Cell Cycle	PLK1, PLK3		Yes	kinase	-96.27		-91.11	-15.13	-61.74	-14.02	-88.51	-93.18	26.74	-88.85	-99.39
Cobalt chloride (CoCl2)	BRD-K90864987	LINCSCP_17021	GVPFVAHMJGGAJG-UHFFFAOYSA-L	24288	No result	Cl[Co]Cl	Cl[Co]Cl	Cobalt chloride (CoCl2)	cobalt(II)-chloride	cobalt(II)-chloride	HIF1A	HIF activator	HIF1A		No		-98.2	-86.34	-66.27	-93.98	-97.84	-58.9	-96.4	-93.05	-97.45	-55.54	NaN
Prostratin	BRD-K91145395	LINCSCP_16904	BOJKFRKNLSCGHY-HXGSDTCMSA-N	454217	CHEMBL170518	C[C@@H]1C[C@]2(OC(=O)C)[C@H]([C@@H]3C=C(CO)C[C@@]4(O)[C@@H](C=C(C)C4=O)[C@@]13O)C2(C)C	CC(=O)O[C@@]12C[C@@H](C)[C@]3(O)C4=CC(C)C(=O)[C@@]4(O)CC(CO)=C[C@H]3[C@@H]1C2(C)C	Prostratin	prostratin	prostratin	PRKCA	Inflammatory	Binds to PRKCE, PRKCG, PRKD3, PRKCB, PRKCQ, PRKCD	protein kinase Calpha activation and block of insulin induction of protein kinase Czeta. These changes persisted in isolated adipocytes from the transgenic mice and were rescued by the protein kinase C inhibitor bisindolylmaleimide	No	kinase	-97.3		41.44	26.6	-99.02	-82.85	-95.75	-83.97	-97.89	-95.38	-57.75
Anisomycin	BRD-K91370081	LINCSCP_11343	YKJYKKNCCRKFSL-RDBSUJKOSA-N	253602	CHEMBL423192	COc1ccc(C[C@H]2NC[C@H](O)[C@H]2OC(C)=O)cc1	COc1ccc(C[C@H]2NC[C@H](O)[C@H]2OC(C)=O)cc1	Anisomycin	anisomycin	anisomycin	NHP2L1	DNA	NHP2L1, RPL10L, RPL11, RPL13A, RPL15, RPL19, RPL23, RPL23A, RPL26L1, RPL3, RPL37, RPL8, RSL24D1		No	kinase	79.97	74.81	56.33	NaN	54.28	0	26.98	73.1	0	-88.6	73.97
Abt-751	BRD-K91623615	LINCSCP_10450	URCVCIZFVQDVPM-UHFFFAOYSA-N	3035714	CHEMBL20684	COc1ccc(cc1)S(=O)(=O)Nc1cccnc1Nc1ccc(O)cc1	COc1ccc(S(=O)(=O)Nc2cccnc2Nc2ccc(O)cc2)cc1	Abt-751	ABT-751	ABT-751	TUBB	Tubulin inhibitor	TUBB		No		-92.05		-82.31	-67.7	0	0	-97.39	-76.54	-96.94	-35.32	-71.43
3-[2,4-Dimethyl-5-[(E)-(2-oxo-1H-indol-3-ylidene)methyl]-1H-pyrrol-3-yl]propanoic acid	BRD-K91696562	LINCSCP_2464	NHFDRBXTEDBWCZ-NTEUORMPSA-N	5995546	CHEMBL1614706	Cc1[nH]c(\C=C2\C(=O)Nc3ccccc23)c(C)c1CCC(O)=O	C=c1[nH]c(=Cc2c(O)[nH]c3ccccc23)c(C)c1CCC(=O)O	3-[2,4-Dimethyl-5-[(E)-(2-oxo-1H-indol-3-ylidene)methyl]-1H-pyrrol-3-yl]propanoic acid	orantinib	orantinib	AURKB	Aurora kinase inhibitor	24nM AURKB inhibitor; FLT1/AURKA/PDGFRB		No	kinase	-77.02		-15.15	0	40.87	0	-73.86	0	-94.67	-94.51	-89.66
1,4-Diamino-2,3-dicyano-1,4-bis(o-aminophenylmercapto)butadiene	BRD-K91701654	LINCSCP_11092	DVEXZJFMOKTQEZ-JYFOCSDGSA-N	3006531	CHEMBL34704	N\C(Sc1ccccc1N)=C(C#N)/C(C#N)=C(/N)Sc1ccccc1N	N#CC(C(=N)Sc1ccccc1N)C(C#N)C(=N)Sc1ccccc1N	1,4-Diamino-2,3-dicyano-1,4-bis(o-aminophenylmercapto)butadiene	U-0126	n/a	AKT1/GSK3B/MAPK	MAPK/MEK/ERK	AKT1, CHEK1, GSK3B, JAK2, LCK, MAP2K1, MAP2K2, MAP2K7, MAPK1, MAPK11, MAPK12, MAPK14, MAPK8, PRKCA, RAF1, ROCK1, RPS6KB1, SGK1		No	kinase	88.35		91.59	-20.47	88.39	0	0	86.34	95.99	58.45	0
Memantine	BRD-K91938660	LINCSCP_1945	BUGYDGFZZOZRHP-UHFFFAOYSA-N	4054	No result	C[C@@]1(C[C@@H]2C[C@]3(C)C1)C[C@](N)(C2)C3	C[C@]12C[C@@H]3C[C@](C)(C1)C[C@@](N)(C3)C2	Memantine	memantine	BRD-A79803969	GRIN1	Glutamate	GRIN1, CHRFAM7A, CYP2E1, DRD2, GRIN2A, GRIN2B, GRIN3A, HTR3A	AD Drug; PMID: 31280448. Appears to feedback increase insulin degradation enzyme (other CNS roles). Fits with idea of insulin mediated insulin resistance	No		94.47		92.7	73.75	81.14	25.03	92.85	NaN	99.24	42.57	NaN
1H-1,4-Diazepine, hexahydro-1-((5-iodo-1-naphthalenyl)sulfonyl)-	BRD-K93201660	LINCSCP_14157	GEHJIACZUFWBTK-UHFFFAOYSA-N	4216	CHEMBL249089	Ic1cccc2c(cccc12)S(=O)(=O)N3CCCNCC3	O=S(=O)(c1cccc2c(I)cccc12)N1CCCNCC1	1H-1,4-Diazepine, hexahydro-1-((5-iodo-1-naphthalenyl)sulfonyl)-	ML-7	ML-7	MYLK	Calcium	MYLK	Insulin pathway PMID: 24116218	Yes	kinase	79.71		56.29	89.29	97.25	70.41	42.83	96.33	-41.56	-28.87	65.57
Methylprednisolone acetate	BRD-K94070024	LINCSCP_20760	PLBHSZGDDKCEHR-LFYFAGGJSA-N	5877	CHEMBL1364144	C[C@H]1C[C@H]2[C@@H]3CC[C@](O)(C(=O)COC(=O)C)[C@@]3(C)C[C@H](O)[C@@H]2[C@@]4(C)C=CC(=O)C=C14	CC(=O)OCC(=O)[C@@]1(O)CC[C@H]2[C@@H]3CC(C)=C4CC(=O)C=C[C@]4(C)[C@H]3[C@@H](O)C[C@@]21C	Methylprednisolone acetate	depomedrol	depomedrol	NR3C1, AR	Steriod	ESR1, ESR2, CYP3A5, EBP, GPER1, PRKCA, PRKCB, PRKCD, PRKCE, PRKCG, PRKCI, PRKCQ, PRKCZ, AR		No		67.42		57.17	71.18	0	94.86	0	90.74	57.84	-18.83	NaN
Osi-027	BRD-K94294671	LINCSCP_11094	JROFGZPOBKIAEW-UHFFFAOYSA-N	135398516	CHEMBL2132692	COc1cccc2cc([nH]c12)-c1nc([C@@H]2CC[C@@H](CC2)C(O)=O)n2ncnc(N)c12	COc1cccc2cc(-c3nc(C4CCC(C(=O)O)CC4)n4ncnc(N)c34)[nH]c12	Osi-027	OSI-027	OSI-027	MTOR	MTOR	57nM RET, 69nM YES1, 550nM ACVR1B, 780nM TGFBR1		No	kinase	90.51	97.17	75.98	98.31	28.8	49.72	92.79	0	63.97	97	0
1-Tert-butyl-3-(4-chlorophenyl)-1H-pyrazolo[3,4-d]pyrimidin-4-amine	BRD-K95785537	LINCSCP_11486	PBBRWFOVCUAONR-UHFFFAOYSA-N	4878	CHEMBL406845	CC(C)(C)n1nc(-c2ccc(Cl)cc2)c2c(N)ncnc12	CC(C)(C)n1nc(-c2ccc(Cl)cc2)c2c(N)ncnc21	1-Tert-butyl-3-(4-chlorophenyl)-1H-pyrazolo[3,4-d]pyrimidin-4-amine	PP-2	PP-2	SRC	SRC inhibitor	SRC, LCK, ABL1, LYN, RIPK2	SRC is a nonreceptor tyrosine kinase promotes STAT1 cytoplasmic abundance. SRC inhibitor, SRCIN1, prevents SRc mediated RAS/ERK signalling PMID: 24456795. Loss of SRCIN1 promotes angiogenesis - PMID: 30315850	Yes	kinase	96.33		99.62	88.32	91.65	84.6	98.43	76.18	98.58	0	0
Hexamethylquercetagetin	BRD-K95885906	LINCSCP_11215	CHXSDKWBSFDZEU-UHFFFAOYSA-N	386331	CHEMBL225698	COc1ccc(cc1OC)-c1oc2cc(OC)c(OC)c(OC)c2c(=O)c1OC	COc1ccc(-c2oc3cc(OC)c(OC)c(OC)c3c(=O)c2OC)cc1OC	Hexamethylquercetagetin	quercetagetin	quercetagetin	PIM1	PIM-1	PIM1	"PIM1 has a role in cardioprotection downstream of AKT activation". PMID: 32273566	No	kinase	71.69		-11.64	58.83	92.37	-75.82	-68.18	0	80.42	68.42	0
Nifedipine	BRD-K96354014	LINCSCP_10456	HYIMSNHJOBLJNT-UHFFFAOYSA-N	4485	No result	COC(=O)C1=C(C)NC(C)=C(C1c1ccccc1[N+]([O-])=O)C(=O)OC	COC(=O)C1=C(C)N=C(C)C(C(=O)OC)C1c1ccccc1[N+](=O)[O-]	Nifedipine	nifedipine	nifedipine	CACNA1C	Calcium	CACNA1C, CACNA1D, CACNA1S, CACNA2D1, CACNA1F, CACNA1H, CACNB2, CALM1, CYP3A5, GLRA1, GLRA3, GLRB, KCNA1, KCNA5, NR1I2, TRPM3	"nifedipine ameliorates nonalcoholic fatty liver disease by restoring autophagic". PMID: 30623792, PMID: 12441210. Improve glucose toleranceand lowers lipids PMID: 26849821 PMID ﻿20847723 PMID: 10052641 but not in this study PMID: 9633024 "In contrast, nifedipine-treated patients had similar plasma insulin, but lower plasma glucose and triglyceride concentrations after four months of therapy. " P…	No	kinase	83.96		24.34	84.66	30.16	85.61	13.99	-14.35	96.64	16.14	97.32
PI-828	BRD-K97365803	LINCSCP_11358	WUKMIBOGGXMBAC-UHFFFAOYSA-N	25181195	No result	Nc1ccc(cc1)-c1cccc2c1oc(cc2=O)N1CCOCC1	Nc1ccc(-c2cccc3c(=O)cc(N4CCOCC4)oc23)cc1	PI-828	PI-828	PI-828	Unknown	Anti-Inflammatory	Anti-inflammation; TNFa	Anti-inflammatory according to PubChem; Amino modified cmpd LY 294002 is a PI3K inhibitor	No		95.33	94.75	94.25	98.37	58.22	91.69	98.61	57.23	0	24.31	37.51
Methyl (1R,9R,10S,11R,12R,19R)-11-acetyloxy-12-ethyl-4-[(12S,14S)-16-ethyl-12-methoxycarbonyl-1,10-diazatetracyclo[12.3.1.03,11.04,9]octadeca-3(11),4,6,8,15-pentaen-12-yl]-10-hydroxy-5-methoxy-8-methyl-8,16-diazapentacyclo[10.6.1.01,9.02,7.016,19]nonadeca-2,4,6,13-tetraene-10-carboxylate	BRD-K97514127	LINCSCP_1953	GBABOYUKABKIAF-IELIFDKJSA-N	13200033	CHEMBL553025	CCC1=C[C@H]2CN(C1)Cc1c([nH]c3ccccc13)[C@@](C2)(C(=O)OC)c1cc2c(cc1OC)N(C)[C@@H]1[C@]22CCN3CC=C[C@](CC)([C@@H]23)[C@@H](OC(C)=O)[C@]1(O)C(=O)OC	CCC1=C[C@H]2CN(C1)Cc1c([nH]c3ccccc13)[C@@](C(=O)OC)(c1cc3c(cc1OC)N(C)[C@H]1[C@@](O)(C(=O)OC)[C@H](OC(C)=O)[C@]4(CC)C=CCN5CC[C@]31[C@@H]54)C2	Methyl (1R,9R,10S,11R,12R,19R)-11-acetyloxy-12-ethyl-4-[(12S,14S)-16-ethyl-12-methoxycarbonyl-1,10-diazatetracyclo[12.3.1.03,11.04,9]octadeca-3(11),4,6,8,15-pentaen-12-yl]-10-hydroxy-5-methoxy-8-methyl-8,16-diazapentacyclo[10.6.1.01,9.02,7.016,19]nonadeca-2,4,6,13-tetraene-10-carboxylate	vinorelbine	vinorelbine	TUBB	Tubulin inhibitor	TUBB		No		-87.72		-77.19	-44.5	-66.35	-87.18	0	NaN	-96.47	-80.33	NaN
Plinabulin	BRD-K99498722	LINCSCP_11097	UNRCMCRRFYFGFX-TYPNBTCFSA-N	9949641	CHEMBL1096380	CC(C)(C)c1[nH]cnc1\C=c1/[nH]c(=O)\c(=C\c2ccccc2)[nH]c1=O	CC(C)(C)c1[nH]cnc1C=c1[nH]c(=O)c(=Cc2ccccc2)[nH]c1=O	Plinabulin	NPI-2358	NPI-2358		Tubulin inhibitor			No		-85.19		-71.88	-79.19	0	-53.27	-72.92	-92.03	-82.26	0	-96.14
PIK90	BRD-K99818283	LINCSCP_10459	FCKJZIRDZMVDEM-UHFFFAOYSA-N	135398491	No result	COc1ccc2C3=NCCN3C(=Nc2c1OC)NC(=O)c4cccnc4	COc1ccc2c3n(c(=NC(=O)c4cccnc4)nc2c1OC)CCN3	PIK90	PIK-90	PIK-90	PIK3CA	PI3K	10nM PIK3CA, 11nM PIK3R1, 13nM PRKDC		No	kinase	95.63	76.63	46.29	99.15	88.5	96.38	92.37	95.99	38.26	99.14	0
Hexylresorcinol	BRD-K99946902	LINCSCP_266935	WFJIVOKAWHGMBH-UHFFFAOYSA-N	3610	CHEMBL443605	CCCCCCc1ccc(O)cc1O	CCCCCCc1ccc(O)cc1O	Hexylresorcinol	hexylresorcinol	hexylresorcinol	TYR	Tyrosinase inhibitor	TYR	Tyrosinase (EC 1.14.18.1) catalyzes the first 2 steps, and at least 1 subsequent step, in the conversion of tyrosine to melanin	No		-74.77	92.37	95.45	0	-85.05	-78.54	-67.82	-81.63	66.64	-77.53	NaN
Methane;methyl (1R,9R,10S,11R,12S,19R)-11-acetyloxy-12-ethyl-4-[(12S,14R)-16-ethyl-12-methoxycarbonyl-1,10-diazatetracyclo[12.3.1.03,11.04,9]octadeca-3(11),4,6,8,15-pentaen-12-yl]-10-hydroxy-5-methoxy-8-methyl-8,16-diazapentacyclo[10.6.1.01,9.02,7.016,19]nonadeca-2,4,6,13-tetraene-10-carboxylate	BRD-M30523314	LINCSCP_16746	YNSJJMODRKJNIH-XVCODHQGSA-N	73707424	CHEMBL553025	CCC1=C[C@@H]2C[N@](C1)Cc1c([nH]c3ccccc13)[C@@](C2)(C(=O)OC)c1cc2c(cc1OC)N(C)[C@@H]1[C@]22CCN3CC=C[C@@](CC)([C@@H]23)[C@@H](OC(C)=O)[C@]1(O)C(=O)OC	CCC1=C[C@@H]2CN(C1)Cc1c([nH]c3ccccc13)[C@@](C(=O)OC)(c1cc3c(cc1OC)N(C)[C@H]1[C@@](O)(C(=O)OC)[C@H](OC(C)=O)[C@@]4(CC)C=CCN5CC[C@]31[C@@H]54)C2	Methane;methyl (1R,9R,10S,11R,12S,19R)-11-acetyloxy-12-ethyl-4-[(12S,14R)-16-ethyl-12-methoxycarbonyl-1,10-diazatetracyclo[12.3.1.03,11.04,9]octadeca-3(11),4,6,8,15-pentaen-12-yl]-10-hydroxy-5-methoxy-8-methyl-8,16-diazapentacyclo[10.6.1.01,9.02,7.016,19]nonadeca-2,4,6,13-tetraene-10-carboxylate	Methane vinorelbine	Methane vinorelbine	TUBB	Tubulin inhibitor	TUBB		No		-75.72		-55.47	-32.02	0	-45.44	-76.72	0	-98.21	-94.01	-77.45
N-[4-[[[(2,6-Dichloro-3,5-dimethoxyanilino)-oxomethyl]-[6-[4-(4-methyl-1-piperazinyl)anilino]-4-pyrimidinyl]amino]methyl]phenyl]-2-propenamide	BRD-U25771771	LINCSCP_16752	SFLKJNSBBVSPFE-UHFFFAOYSA-N	73707531	No result	n/a	n/a	N-[4-[[[(2,6-Dichloro-3,5-dimethoxyanilino)-oxomethyl]-[6-[4-(4-methyl-1-piperazinyl)anilino]-4-pyrimidinyl]amino]methyl]phenyl]-2-propenamide	WZ-4-145	FIIN-3	DDR1	Tyrosine kinase Receptor	DDR1, EGFR, PDGFRA, TIE1, CSF1R	"Discovery of a Potent and Selective DDR1 Receptor Tyrosine Kinase Inhibitor" PMID: 23899692 Cell membrane (EGF signalling) and Nuclear role (DNA-PK) IR and EGFR activation and negative cooperativity PMID: 32297376. soluble EGFR described as a T2DM and hepatic IR biomarker: PMID: 33005239. hyperinsulinemia causes resistance to EGFR inhibitor (gefitinib) PMID: 32963612. An EGRF ligand is amphiregu…	No	Kinase	87.1		-29.42	-44.86	90.23	88.69	99.74	92.84	80.09	61.86	95.14
N-[2-Methyl-5-[2-oxo-9-(1H-pyrazol-4-yl)-1-benzo[h][1,6]naphthyridinyl]phenyl]-2-propenamide	BRD-U33728988	LINCSCP_11105	JMVDIGHUQAXWIE-UHFFFAOYSA-N	73707530	No result	n/a	n/a	N-[2-Methyl-5-[2-oxo-9-(1H-pyrazol-4-yl)-1-benzo[h][1,6]naphthyridinyl]phenyl]-2-propenamide	QL-X-138	QL-X-138	BTK	MTOR	<10nM BTK, BMX, BLK, JAK3	BTK/MNK Dual Inhibitor for Lymphoma and Leukemia PMID: 26165234	No	kinase	83.94	95.31	94.2	65.18	0	48.23	0	88.92	0	95.4	0
N-[4-[(4-Ethylpiperazin-1-yl)methyl]-3-(trifluoromethyl)phenyl]-3-[(E)-2-(4-methoxy-1H-pyrrolo[2,3-b]pyridin-5-yl)ethenyl]-4-methylbenzamide	BRD-U37049823	LINCSCP_10963	UMBFDGUGXMOMHX-BQYQJAHWSA-N	53302361	No result	n/a	n/a	N-[4-[(4-Ethylpiperazin-1-yl)methyl]-3-(trifluoromethyl)phenyl]-3-[(E)-2-(4-methoxy-1H-pyrrolo[2,3-b]pyridin-5-yl)ethenyl]-4-methylbenzamide	HG6-64-1	HG-6-64-01	ABL1	RAF inhibitor	ABL1, BRAF, CSF1R, EGFR, FGFR1, FLT3, KIT, MAPK11, PDGFRB, RET	RAF1 increased in obese IR PMID: 17986714. Interacts with insulin signalling PMID: 32982400. Listed as a AKT1 substrate. Part of RAF to EMK to MAPK cascade (? Where MAPK feedback inhibits RAF). RAF inhibitors can block MAPK signalling but context specific (activate the RAF-MEK-ERK pathway in a RAS-dependent manner,). PMID: 20130579	No	kinase	90.01	78.96	40.64	48	68.53	92.49	83.8	0	92.13	67.87	70.47
2,6-Dimethylphenyl (2,4-dimethoxyphenyl)(2-((4-(4-methylpiperazin-1-yl)phenyl)amino)pyrimidin-4-yl)carbamate	BRD-U44618005	LINCSCP_16758	NBTNHSGBRGTFJS-UHFFFAOYSA-N	11844351	CHEMBL213100	n/a	n/a	2,6-Dimethylphenyl (2,4-dimethoxyphenyl)(2-((4-(4-methylpiperazin-1-yl)phenyl)amino)pyrimidin-4-yl)carbamate	KIN112	WH-4-023	ABL1	SRC inhibitor	ABL1, LCK, SRC	SRC is a nonreceptor tyrosine kinase promotes STAT1 cytoplasmic abundance. SRC inhibitor, SRCIN1, prevents SRc mediated RAS/ERK signalling PMID: 24456795. Loss of SRCIN1 promotes angiogenesis - PMID: 30315850	No	kinase	92.5		74.4	-11.77	95.09	0	86.78	0	0	92.58	88.2
1-[4-[[4-Amino-5-chloro-6-(2-propan-2-ylsulfonylanilino)-2-pyrimidinyl]amino]-3-methoxyphenyl]-4-piperidinecarboxamide	BRD-U44700465	LINCSCP_10964	IMEGLYUXMGWVQA-UHFFFAOYSA-N	25226117	No result	n/a	n/a	1-[4-[[4-Amino-5-chloro-6-(2-propan-2-ylsulfonylanilino)-2-pyrimidinyl]amino]-3-methoxyphenyl]-4-piperidinecarboxamide	HG-5-88-01	1-[4-[[4-amino-5-chloro-6-(2-propan-2-ylsulfonylanilino)-2-pyrimidinyl]amino]-3-methoxyphenyl]-4-piperidinecarboxamide	ADCK4	Tyrosine kinase Receptor	ADCK4, EGFR	Cell membrane (EGF signalling) and Nuclear role (DNA-PK) IR and EGFR activation and negative cooperativity PMID: 32297376. soluble EGFR described as a T2DM and hepatic IR biomarker: PMID: 33005239. hyperinsulinemia causes resistance to EGFR inhibitor (gefitinib) PMID: 32963612. An EGRF ligand is amphiregulin (induced by High fat feeding) PMID: 32135161. Pro inflammatory RHBDF2 (iRHOM2) promotes i…	No	Kinase	91.94	83.11	85.53	83.94	0	69.36	46.6	-41.04	91.82	98.77	0
N-[2-Methyl-5-[oxo-[3-(1-oxoprop-2-enylamino)-5-(trifluoromethyl)anilino]methyl]phenyl]-5-isoxazolecarboxamide	BRD-U73238814	LINCSCP_11108	UASQUKUDXJFTCO-UHFFFAOYSA-N	73265214	CHEMBL3188661	n/a	n/a	N-[2-Methyl-5-[oxo-[3-(1-oxoprop-2-enylamino)-5-(trifluoromethyl)anilino]methyl]phenyl]-5-isoxazolecarboxamide	QL-XI-92	QL-XI-92	DDR1	Tyrosine kinase Receptor	DDR1 (receptor tyrosine kinases)	Interacts with IR/IGF1R - IIGFs-DDR1 crosstalk presents a feed-forward mechanism. PMID: 31394114	No	Kinase	83.49		92.44	47.21	0	-70.91	84.95	0	92.01	-24.11	96.12
Atorvastatin	BRD-U88459701	LINCSCP_1063	XUKUURHRXDUEBC-KAYWLYCHSA-N	60823	CHEMBL1487	CC(C)c1c(C(=O)Nc2ccccc2)c(c(-c2ccc(F)cc2)n1CCC(O)CC(O)CC(O)=O)-c1ccccc1	CC(C)c1c(C(=O)Nc2ccccc2)c(-c2ccccc2)c(-c2ccc(F)cc2)n1CCC(O)CC(O)CC(=O)O	Atorvastatin	atorvastatin	atorvastatin	HMGCR	Cholesterol	HMGCR, DPP4, AHR, CYP3A5, FASLG	Statin / protein prenylation	No		72.48		-50.6	0	-69.49	78.51	94.41	-56.89	78.49	54.62	70.62

## Sheet: S4
Function - less gene - better IR	IR-DR Score	Condition		Function - more gene - better IR	KD	OE
SMAD3	86.79	KD		AURKB	-83.05	KD
SMAD3	-95.05	OE		AURKB	62.33	OE
RARA	-94.77	OE		PRKCA	-75.45	KD
HNF4A	-93.27	OE		PRKCA	85.28	OE
YES1	-86.43	OE		TTK	68.76	OE
CSNK1A1L	-85.09	OE		TP53	72.63	OE
RORC	-81.77	OE		FLT1	79.28	OE
PSMB8	-75.93	OE		IFNG	80.23	OE
ABCC3	99.87	KD		ADORA2A	80.7	OE
ABCC4	79.23	KD		DDR1	84.05	OE
ATP5A1	71.01	KD		DDR1	84.05	OE
CDK5	73.14	KD		ABCC1	-86.98	KD
CDK7	74.06	KD		ADCY3	-91.48	KD
CSNK1A1	81.42	KD		APP	-78.3	KD
DYRK1A	93.53	KD		CDC7	-93.58	KD
EHMT2	74.29	KD		CDK16	-96.53	KD
EPHA2	85.76	KD		CDK19	-90.74	KD
FGFR3	76.54	KD		CIT	-77.74	KD
FUS	77.81	KD		GAK	-87.69	KD
FYN	81.97	KD		GLS	-85.49	KD
HIPK1	82.43	KD		HSPA8	-76.24	KD
IFNB1	95.33	KD		HSPB1	-91.94	KD
IL1B	96.34	KD		MAP2K2	-77.74	KD
KEAP1	93.94	KD		NPSR1	-82.16	KD
LRRK2	89.76	KD		PLK1	-83.99	KD
LRRK2	89.76	KD		PLK1	-83.99	KD
MAPK8	96.67	KD		PRKCH	-75.28	KD
MGLL	71.23	KD		RIOK2	-70.2	KD
MLLT3	90.79	KD		TBK1	-74.91	KD
NEK2	76.28	KD		TTR	-75.54	KD
PIK3C2A	92.99	KD		WEE1	-85.28	KD
PIK3CA	82.7	KD
PIP4K2C	81.99	KD
PLAU	70.46	KD
PPARD	98.58	KD
PRKCB	73.64	KD
PRKCQ	97.04	KD
PSIP1	79.06	KD
PSMA8	89	KD
RHOA	94.78	KD
ROCK2	83.65	KD
RPTOR	87.93	KD
SMARCA4	70.39	KD
TARDBP	72.97	KD

## Sheet: S5
ALL Listed with activity vs EGFR	Assay	IR-DR Score	Top targets	Log EGFR nM	EGFR (nM)
Canertinib	BRD-K50168500	93.97	<1nM EGFR	-0.00436481	0.99
Tyrphostin AG-112	BRD-K01192156	86.16	100nM EGFR	2	100
dasatinib	BRD-K49328571	84	<1nM ABL1, 110nM EGRF, <1nM EPHB6, EPHA3, ABL2, LCK, RIP2K	2.04139	110
Falnidamol	BRD-K70914287	82.43	<1nM EGFR	-0.00436481	0.99
4,5-dianilinophthalimide (DAPH)	BRD-K13087974	81.3	160nM EGFR, 1.6uM CYP3A4, 2.5uM GLS,	2.20412	160
WZ-4002	BRD-K72420232	78.77	<1nM EGFR	-0.00436481	0.99
Afatinib	BRD-K66175015	77.23	<1nM EGFR, 1nM ERBB2,3,4, ABL1500nM	-0.00436481	0.99
Erlotinib	BRD-K70401845	72.33	0.3nM ERBB3, 0.5nM EGFR inhibitor, 2.7nM ERBB4, 3nM GAK	-0.522879	0.3
PD-158780	BRD-K48735772	71.28	<1nM EGFR	-0.00436481	0.99
Gefitinib	BRD-K64052750	68.93	<1nM EGFR	-0.00436481	0.99
Tyrphostin 46	BRD-K60184833	64.27	3.5uM EGFR	3.54407	3500
Lapatinib	BRD-K19687926	39.16	3.5nM EGFR, 9nM ERBB2, 47nMERBB4, 3uM STK10	0.544068	3.5
CGP-53353	BRD-K32292990	24.63	700nM EGFR	2.8451	700
CP-724714	BRD-K76908866	21.13	10nM EGFR	1	10
SU-1498	BRD-K34995470	18.33	700nM KDR	2.8451	700
GW-583340	BRD-K79930101	15.21	10nM EGFR	1	10
benzyl-quinazolin-4-yl-amine	BRD-K43796186	11.53	320nM EGFR	2.50515	320
lavendustin-a	BRD-K23583188	11	11nM EGFR (Tocris website), SRC 500nM	1.11394	13
Tyrphostin 47	BRD-K96778649	5.6	100nM 17BHADH2, 125nM POLK, 850nM EGFR	2.92942	850
Lavendustin-c	BRD-K80725632	3.81	30nM EGFR, 200nM CAMKK2, <1uM HER2	1.47712	30
Tyrphostin AG-1478	BRD-K68336408	0.39	<1nM EGFR, 100uM ERBB2	-0.00436481	0.99
PP-3	BRD-K16977723	0	2.7uM EGFR	3.43136	2700
Bosutinib	BRD-K99964838	-3.28	<1nM ABL1, 30nM EGFR	1.46538	29.2
AG-99	BRD-K51223576	-3.95	4.5uM EGFR, 6uM ERBB2, 7uM LCK	3.65321	4500
AG-494	BRD-K81209512	-6.71	630nM GLS, 700nM EGFR	2.8451	700
Tyrphostin	BRD-K08132273	-6.72	<1nM EGFR, 40nM MAPK1, 125nM ABL2, ABL1	-0.00436481	0.99
AG-490 (Tyrphostin B42)	BRD-K47105409	-10	100-500 nM EGFR, 560nM GLS, 3.4uM JAK1	2.69897	500
Alvocidib	BRD-K87909389	-10.47	<1nM ICK, 3nM CDK9, 3nM CCNT1, multiple <50nM, 1.6uM EGFR	3.20412	1600
Tyrphostin AG-555	BRD-K72783841	-11.93	660nM GRIN2B, GRIN1, 700nM EGFR	2.8451	700
bis-tyrphostin	BRD-K32906660	-17.51	110nM POLI, POLH, POLB; 400nM EGFR	2.60206	400
Tyrphostin AG-82	BRD-K03670461	-19.23	1uM EGFR, 2uM PLOK	3	1000
Tyrphostin 51	BRD-K47943470	-20.1	447nM TDP1 (tyrosyl-DNA phosphodiesterase) <1uM POLK; <1uM EGFR	2.99957	999
RG-13022	BRD-K82688027	-20.17	700nM EGFR; 3uM PDGFRB	2.8451	700
Neratinib	BRD-K85606544	-20.49	<1nM EGFR; <5nM ERBB2,3,4 ; 260nM NEK2	-0.00436481	0.99
Tyrphostin AG-556	BRD-K14441456	-22.12	250nM JAK2, <1uM GRIN2B, GRIN1, 1uM EGFR, 1.6uM ALOX15	3	1000
Alisertib	BRD-K75295174	-89.79	<1nM AURKA, 200nM EGFR	2.30103	200
Tyrphostin AG-835 (Tyrphostin B44, (+) enantiomer)	BRD-K17415526	-90.56	250nM ALOX15 inhibitor; 794nM GLS, 860nM EGFR (tocris)	2.9345	860

## Sheet: S6
Protein Targets	Alisertib (-90)	Neratinib (-20)	Bosutinib (-3)	Lapatinib (39)	Gefitinib (69)	Erlotinib (72)	Afatinib (77)	Dasatinib (84)	Canertinib (94)
AURKA	531	6282	9426	7210	76	100	285	11015	1924
AURKB	26	44	709	3	21	14	16	12	23
EPHA2	1717	6260	27	18005	844	786	2065	61	272
BLK	12	4	2	7	3	2	1	9	2
PLK4	5	55	42	136	19	36	72	26	194
EGFR	85	10	29	2	6	12	6	25	5
MAP4K5	4245	27	50	1489	32	59	391	20	123
ERBB4	17040	21	435	633	126	1342	81	908	52
ERBB2	17361	14	1613	19	131	2874	18	750	32
ERBB3	16927	33	21	514	1093	935	102	202	73
STK24	18806	3057	7093	17989	16189	17421	17336	9457	10255		0.00135339
STK26	18818	504	2651	18281	18372	17142	12584	8421	10731
MAP4K3	4640	45	33	7131	1251	366	598	45	347
ABL1	112	51	13	71	16	8	14	6	3
LCK	6	7	1	89	1	3	10	18	1
ABL2	372	3108	18	1868	31	29	454	13	24
GAK	251	2	4	75	82	28	9	24	20
IRAK1	6427	62	223	222	1062	432	162	170	205
STK10	33	22	35	17	5	23	7	32	22
MAP3K19	1	3	6	4	8	10	2	1	18
EPHB6	632	555	40	88	9	30	13	22	16
EPHA3	1284	2911	41	5985	217	138	3186	56	47
EPHA8	1411	13330	58	4525	155	692	3722	72	196
EPHA5	2186	3959	51	5021	91	1950	2153	94	94
MAP2K5	4151	16	38	23	233	43	12	28	29
Values are fusion rank values across 14 models listed in Figure 5A
Targets are the top ranked lab validated protein targets across the 9 compounds - some proteins are only targeted by a single compound and thus not expected to rank highly across the 9 compounds
Average Rank for compound specific validated protein targets	0.00135332	0.00171768	0.000936914	0.0169686	0.00681866	0.00145742	0.00257651	0.00104102	0.00150947	0.00150947	0.00150947
	Drug_Name	Alisertib	Neratinib	Bosutinib	Lapatinib	Gefitinib	Erlotinib	Afatinib	Dasatinib	Canertinib
	IR-DR score	-90	-20	-3	39	69	72	77	84	94
	nM EGFR	200	0.63	29.2	3.5	0.98	0.52	0.19	118	0.19
		AURKA, AURKB, EPHA2, BLK, PLK4	EGFR, MAP4K5, ERBB4, ERBB2, ERBB3, STK24, STK26, MAP4K3	ABL1, MAP4K5, LCK, ABL2	EGFR, ERBB2, ERBB4	EGFR, GAK, ERBB3, ERBB4, ERBB2, IRAK1	ERBB3, EGFR, ERBB4, GAK, STK10, MAP3K19	EGFR, ERBB3, ERBB4, ERBB2, GAK	EPHB6 ABL1 EPHA3, ABL2, BLK, EPHA8, EPHA5, LCK	EGFR, ERBB4, ERBB2, BLK, ERBB3, MAP2K5, ABL1, GAK
	Verfied targets	BRD-K75295174	BRD-K85606544	BRD-K99964838	BRD-M07438658	BRD-K64052750	BRD-K70401845	BRD-K66175015	BRD-K49328571	BRD-K50168500
	EGFR	85	10	29	2	6	12	6	25	5
	log	1.92942	1	1.4624	0.30103	0.778151	1.07918	0.778151	1.39794	0.69897
	AURKA	531
	AURKB	26
	EPHA2	1717
	BLK	12							9	2
	PLK4	5
	MAP4K5		27	50
	ERBB4		21		633	126	1342	81		52
	ERBB2		14		19	131		18		32
	ERBB3		33			1093	935	102		73
	STK24		3057
	STK26		504
	MAP4K3		45
	ABL1								6	3
	LCK			1					18
	ABL2			18					13
	GAK					82	28	9		20
	IRAK1					1062
	STK10						23
	MAP3K19						10
	EPHB6								22
	EPHA3								56
	EPHA8								72
	EPHA5								94
	MAP2K5									29

## Sheet: S7
Name	BRD	inchikey	CID	IR-DR score	EGFR log nM	EGFR nM	EGFR Rank Score
Tyrphostin AG-112	BRD-K01192156	DXVJRTIPBNBLLB-BJMVGYQFSA-N	5328804	86	2	100	6755
Falnidamol	BRD-K70914287	FTFRZXFNZVCRSK-UHFFFAOYSA-N	6918508	82	0	1	88
4,5-dianilinophthalimide (DAPH)	BRD-K13087974	AAALVYBICLMAMA-UHFFFAOYSA-N	1697	81	2.2	158.489	320
WZ-4002	BRD-K72420232	ITTRLTNMFYIYPA-UHFFFAOYSA-N	44607530	79	0	1	371
PD-158780	BRD-K48735772	KFHMLBXBRCITHF-UHFFFAOYSA-N	4707	71	0	1	98
Tyrphostin 46	BRD-K60184833	USOXQZNJFMKTKJ-XVNBXDOJSA-N	5328768	64	3.54	3467.37	5625
CGP-53353	BRD-K32292990	RONQPWQYDRPRGG-UHFFFAOYSA-N	6711154	25	2.85	707.946	45
CP-724714	BRD-K76908866	LLVZBTWPGQVVLW-SNAWJCMRSA-N	9874913	21	1	10	22
SU-1498	BRD-K34995470	JANPYFTYAGTSIN-FYJGNVAPSA-N	5941539	18	2.85	707.946	2991
GW-583340	BRD-K79930101	MNNXRVSQOABRRP-UHFFFAOYSA-N	5329480	15	1	10	9
lavendustin-a	BRD-K23583188	ULTTYPMRMMDONC-UHFFFAOYSA-N	3894	13	1.11	12.8825	1159
benzyl-quinazolin-4-yl-amine	BRD-K43796186	FVWANTDQRFSCAL-UHFFFAOYSA-N	616573	12	2.51	323.594	1053
Tyrphostin 47	BRD-K96778649	ZGHQGWOETPXKLY-XVNBXDOJSA-N	667601	6	2.93	851.138	11672
Lavendustin-c	BRD-K80725632	LULATDWLDJOKCX-UHFFFAOYSA-N	3896	4	1.48	30.1995	348
Tyrphostin AG-1478	BRD-K68336408	GFNNBHLJANVSQV-UHFFFAOYSA-N	2051	0	0	1	12
PP-3	BRD-K16977723	KKDPIZPUTYIBFX-UHFFFAOYSA-N	4879	0	3.43	2691.53	8021
AG-99	BRD-K51223576	USOXQZNJFMKTKJ-UHFFFAOYSA-N	2065	-4	3.54	3467.37	5625
Tyrphostin	BRD-K08132273	KXDONFLNGBQLTN-UHFFFAOYSA-N	2062	-7	0	1	13
AG-494	BRD-K81209512	HKHOVJYOELRGMV-UHFFFAOYSA-N	2055	-7	2.85	707.946	438
Alvocidib	BRD-K87909389	BIIVYFLTOXDAOV-YVEFUNNKSA-N	5287969	-10	3.2	1584.89	4
AG-490 (Tyrphostin B42)	BRD-K47105409	TUCIOBMMDDOEMM-RIYZIHGNSA-N	5328779	-10	2.7	501.187	1452
Tyrphostin AG-555	BRD-K72783841	GSQOBTOAOGXIFL-UHFFFAOYSA-N	2058	-12	2.85	707.946	1312
bis-tyrphostin	BRD-K32906660	ZHOKHSGWBNPFQU-GONBZBRSSA-N	5329255	-18	2.6	398.107	2850
Tyrphostin AG-82	BRD-K03670461	YZOFLYUAQDJWKV-UHFFFAOYSA-N	2061	-19	3	1000	10748
RG-13022	BRD-K82688027	DBGZNJVTHYFQJI-RIYZIHGNSA-N	5468216	-20	2.85	707.946	1025
Tyrphostin 51	BRD-K47943470	JKNOYWVMHPMBEL-UNXLUWIOSA-N	5328807	-20	3	1000	4992
Tyrphostin AG-556	BRD-K14441456	GWCNJMUSWLTSCW-UHFFFAOYSA-N	2059	-22	3	1000	2989
Tyrphostin AG-835 (Tyrphostin B44, (+) enantiomer)	BRD-K17415526	UMGQVUWXNOJOSJ-DGGAMASNSA-N	5328769	-91	2.93	851.138	2509

## Sheet: S8
Assay		BRD-K75295174	BRD-K85606544	BRD-K99964838	BRD-M07438658	BRD-K64052750	BRD-K70401845	BRD-K66175015	BRD-K49328571	BRD-K50168500
Drug_Name		Alisertib	Neratinib	Bosutinib	Lapatinib	Gefitinib	Erlotinib	Afatinib	Dasatinib	Canertinib
IR-DR score		-90	-20	-3	39	69	72	77	84	94
nM EGFR		200	0.63	29.2	3.5	0.98	0.52	0.19	118	0.19
Top Target in Kinome assay (<100nM ideally)		AURKA, AURKB, EPHA2, BLK, PLK4	EGFR, MAP4K5, ERBB4, ERBB2, ERBB3, STK24, STK26, MAP4K3	ABL1, MAP4K5, LCK, ABL2	EGFR, ERBB2, ERBB4	EGFR, GAK, ERBB3, ERBB4, ERBB2, IRAK1	ERBB3, EGFR, ERBB4, GAK, STK10, MAP3K19	EGFR, ERBB3, ERBB4, ERBB2, GAK	EPHB6 ABL1 EPHA3, ABL2, BLK, EPHA8, EPHA5, LCK	EGFR, ERBB4, ERBB2, BLK, ERBB3, MAP2K5, ABL1, GAK
Label	order	Alisertib (-90)	Neratinib (-20)	Bosutinib (-3)	Lapatinib (39)	Gefitinib (69)	Erlotinib (72)	Afatinib (77)	Dasatinib (84)	Canertinib (94)	Median Rank +ve	Median Rank inactive	CC with IR-DR score	ABS CC with IR-DR score	Ratio
SLC26A11	80	4	68	56	74	145	109	61	33	128	109	62	0.63	0.63	1.76
PIGN	159	10	180	144	8	87	201	224	503	156	201	77	0.49	0.49	2.61
KDM2A	127	8	34	263	116	162	287	159	734	117	162	75	0.48	0.48	2.16
MAP3K19	6	1	3	6	4	8	10	2	1	18	8	4	0.48	0.48	2.29
GLP1R	187	42	132	160	767	101	230	697	909	150	230	146	0.46	0.46	1.58
MERTK	19	7	1	22	50	15	16	22	63	19	19	15	0.46	0.46	1.31
PTK2B	147	36	39	44	167	185	95	204	1116	152	185	42	0.44	0.44	4.46
KCNH6	142	146	129	214	311	517	135	178	122	613	178	180	0.42	0.42	0.99
PLK4	31	5	55	42	136	19	36	72	26	194	36	49	0.41	0.41	0.74
NLK	74	7422	3953	660	322	104	571	387	42	102	104	2307	-0.91	0.91	0.05
FLT3	11	109	41	84	11	13	11	4	17	14	13	63	-0.9	0.9	0.21
EPHB6	15	632	555	40	88	9	30	13	22	16	16	322	-0.88	0.88	0.05
CREBBP	144	4059	1713	398	454	266	144	1056	145	181	181	1084	-0.86	0.86	0.17
PNP	137	1261	776	1257	101	305	170	158	449	175	175	1017	-0.85	0.85	0.17
ABL1	5	112	51	13	71	16	8	14	6	3	8	61	-0.83	0.83	0.13
FRK	10	97	20	9	20	12	13	17	4	9	12	20	-0.81	0.81	0.6
RIPK2	72	2530	273	63	98	37	115	104	101	72	101	186	-0.79	0.79	0.54
SLK	28	967	35	68	86	24	31	28	34	45	31	77	-0.78	0.78	0.4
EGFR	4	85	10	29	2	6	12	6	25	5	6	20	-0.78	0.78	0.31
LYN	17	553	24	15	147	17	19	21	11	10	17	86	-0.77	0.77	0.2
MKNK1	179	16608	53	1382	145	97	719	223	1369	64	223	764	-0.77	0.77	0.29
HIPK4	43	4820	56	86	285	20	22	76	300	55	55	186	-0.76	0.76	0.3
LPAR5	188	1289	169	843	68	149	231	455	275	62	231	506	-0.76	0.76	0.46
MAP2K5	25	4151	16	38	23	233	43	12	28	29	29	31	-0.76	0.76	0.95
SLC35F4	138	1302	301	569	419	660	173	132	459	176	176	494	-0.76	0.76	0.36
ERBB2	105	17361	14	1613	19	131	2874	18	750	32	131	816	-0.76	0.76	0.16
ERBB4	96	17040	21	435	633	126	1342	81	908	52	126	534	-0.75	0.75	0.24
ERBB3	160	16927	33	21	514	1093	935	102	202	73	202	274	-0.75	0.75	0.74
TNIK	36	1100	6	34	14	65	45	33	16	103	45	24	-0.73	0.73	1.88
IRAK1	164	6427	62	223	222	1062	432	162	170	205	205	223	-0.73	0.73	0.92
MAP4K5	48	4245	27	50	1489	32	59	391	20	123	59	770	-0.73	0.73	0.08
POMT1	118	513	544	399	48	319	94	116	337	145	145	456	-0.73	0.73	0.32
CIT	119	4825	64	2359	35	64	63	353	1780	146	146	1212	-0.73	0.73	0.12
MAP2K1	170	3676	9	20	665	529	379	23	212	50	212	343	-0.72	0.72	0.62
CCKBR	44	135	118	107	60	55	44	29	106	82	55	113	-0.72	0.72	0.49
MUC16	176	2712	76	197	1125	172	217	250	118	358	217	661	-0.71	0.71	0.33
CA14	53	348	284	312	450	45	66	62	149	70	66	330	-0.7	0.7	0.2
MAP4K4	131	4202	13	32	169	1198	76	167	69	207	167	101	-0.69	0.69	1.66
ADORA2B	129	784	531	661	114	222	166	114	674	151	166	596	-0.69	0.69	0.28
MUC5AC	182	2305	226	212	793	901	198	421	207	227	227	510	-0.68	0.68	0.45
MINK1	87	2799	30	73	313	1067	104	293	107	118	118	193	-0.66	0.66	0.61
GAK	21	251	2	4	75	82	28	9	24	20	24	40	-0.65	0.65	0.61
MBOAT2	195	674	1316	852	130	361	208	191	537	239	239	763	-0.64	0.64	0.31
IRAK3	37	1044	342	2051	59	42	53	64	46	31	46	693	-0.64	0.64	0.07
MAP4K2	45	926	8	23	42	366	39	134	54	57	57	33	-0.63	0.63	1.75
LTB4R2	200	825	980	1559	465	466	162	202	798	245	245	903	-0.6	0.6	0.27
SVOP	94	255	392	137	94	124	158	82	210	110	124	196	-0.6	0.6	0.63
SLC24A3	166	594	1054	1100	1058	141	302	207	193	387	207	1056	-0.58	0.58	0.2
ARAF	178	3958	8933	10042	1367	95	1369	5044	124	221	221	6446	-0.58	0.58	0.03
BRAF	39	2878	3599	10067	18	25	62	50	35	71	50	3239	-0.57	0.57	0.02
CA13	82	1630	5232	529	705	110	509	20	598	93	110	1168	-0.57	0.57	0.09
BLK	1	12	4	2	7	3	2	1	9	2	2	6	-0.55	0.55	0.36
OR52L1	197	1578	505	2587	770	193	241	229	847	884	241	1174	-0.54	0.54	0.21
MAP4K1	116	949	5	39	700	297	200	109	44	142	142	370	-0.54	0.54	0.38
AURKC	32	1080	872	3512	121	38	26	38	443	33	38	976	-0.53	0.53	0.04
MUC17	88	368	720	358	186	119	88	467	105	280	119	363	-0.51	0.51	0.33
LRRK2	102	3351	38	152	503	2636	484	73	129	66	129	328	-0.5	0.5	0.39
COG6	56	141	369	289	44	68	132	68	65	162	68	215	-0.49	0.49	0.32
STK10	20	33	22	35	17	5	23	7	32	22	22	28	-0.48	0.48	0.8
HTR3A	128	661	108	134	129	565	205	149	62	164	164	132	-0.46	0.46	1.25
AVPR2	150	572	9281	4523	314	132	510	164	214	188	188	2548	-0.46	0.46	0.07
MLNR	75	241	866	79	45	144	83	27	165	104	104	160	-0.46	0.46	0.65
DMBT1	62	474	3055	188	522	263	64	85	114	76	85	498	-0.45	0.45	0.17
CNIH4	173	2370	1318	9007	1307	213	851	193	1266	155	213	1844	-0.44	0.44	0.12
OR5C1	126	405	276	237	595	227	121	161	332	100	161	341	-0.43	0.43	0.47
OPRD1	183	552	299	412	905	241	227	189	182	299	227	482	-0.43	0.43	0.47
DDR1	13	75	594	16	25	28	21	11	15	13	15	50	-0.42	0.42	0.3
RXFP2	95	780	391	82	84	995	130	63	87	124	124	238	-0.41	0.41	0.52
PTGER1	57	149	811	1626	742	39	74	105	84	34	74	777	-0.41	0.41	0.1
KIT	2	3	48	17	1	2	1	5	3	4	3	10	-0.4	0.4	0.3
OR52K2	122	1767	662	713	850	583	148	79	2164	147	148	782	-0.4	0.4	0.19
SLC24A2	50	23	708	623	5	62	93	54	73	56	62	323	-0.39	0.39	0.19
TEK	14	71	2281	225	83	4	15	15	39	27	15	154	-0.38	0.38	0.1
SORL1	125	406	6746	396	1509	340	116	652	50	159	159	958	-0.36	0.36	0.17
EPHA10	79	1281	3204	43	4410	57	182	555	109	54	109	2243	-0.36	0.36	0.05
MT-ND5	85	108	411	219	39	115	52	192	160	51	115	164	-0.36	0.36	0.7
ABL2	26	372	3108	18	1868	31	29	454	13	24	29	1120	-0.36	0.36	0.03
PKHD1L1	100	3003	888	380	6558	90	127	464	75	157	127	1946	-0.36	0.36	0.07
C5AR2	165	96	3607	2925	1723	205	249	113	1203	133	205	2324	-0.36	0.36	0.09
FGFR3	33	170	7613	304	363	48	40	603	31	30	40	334	-0.35	0.35	0.12
KCP	38	130	3433	30	273	46	90	186	43	48	48	202	-0.35	0.35	0.24
AR	46	14	666	1217	316	54	58	135	89	44	58	491	-0.35	0.35	0.12
FPR3	101	247	1964	563	286	92	111	426	644	127	127	425	-0.34	0.34	0.3
EPHA5	70	2186	3959	51	5021	91	1950	2153	94	94	94	3073	-0.34	0.34	0.03
GALR2	158	259	216	526	281	336	114	58	200	252	200	270	-0.34	0.34	0.74
EPHA8	156	1411	13330	58	4525	155	692	3722	72	196	196	2968	-0.33	0.33	0.07
TIE1	22	20	181	155	117	18	25	45	74	15	25	136	-0.33	0.33	0.18
AGRN	171	299	11543	93	3339	212	124	308	471	180	212	1819	-0.33	0.33	0.12
DENND4B	93	69	8226	147	818	122	118	31	294	187	122	483	-0.33	0.33	0.25
CHRM3	120	403	29	75	146	262	119	146	49	242	146	111	-0.33	0.33	1.32
RRNAD1	99	239	31	327	72	127	199	71	198	81	127	156	-0.33	0.33	0.82
DAPK3	51	792	125	2997	28	63	48	26	1134	84	63	459	-0.33	0.33	0.14
OR5M11	112	357	501	970	254	138	81	153	805	91	138	429	-0.32	0.32	0.32
COL7A1	140	1730	2243	64	4796	177	97	1315	79	222	177	1987	-0.32	0.32	0.09
TNK1	35	11	2853	116	239	33	24	303	67	42	42	178	-0.32	0.32	0.24
SLC46A1	109	235	684	555	230	347	72	111	558	137	137	395	-0.32	0.32	0.35
MAL	184	839	352	5409	1339	103	228	791	340	165	228	1089	-0.32	0.32	0.21
GRM2	115	39	2511	309	57	118	304	347	139	37	139	183	-0.31	0.31	0.76
OR2F2	103	441	1548	1749	77	129	258	101	1615	80	129	995	-0.3	0.3	0.13
ADRB1	23	98	60	1003	13	26	27	8	98	21	26	79	-0.29	0.29	0.33
SLC34A2	97	25	3546	384	252	61	728	370	93	126	126	318	-0.29	0.29	0.4
ADGRD2	60	29	1094	90	262	69	195	78	153	43	78	176	-0.27	0.27	0.44
EPHA6	41	370	5343	99	4985	44	51	527	250	26	51	2678	-0.27	0.27	0.02
DDR2	190	770	14525	53	11401	271	55	2906	38	234	234	6086	-0.26	0.26	0.04
RET	9	24	1594	57	537	23	5	533	8	11	11	297	-0.26	0.26	0.04
AURKB	16	26	44	709	3	21	14	16	12	23	16	35	-0.26	0.26	0.46
MAPK9	132	99	562	2981	128	107	367	349	167	35	167	345	-0.26	0.26	0.48
ENTPD7	154	1226	37	2236	32	194	626	136	1908	170	194	632	-0.25	0.25	0.31
NTRK3	177	396	8061	1037	848	74	78	4107	217	427	217	943	-0.25	0.25	0.23
S1PR2	58	15	1215	87	769	41	75	110	173	69	75	428	-0.24	0.24	0.18
DPP4	86	46	1504	91	909	116	188	323	48	75	116	500	-0.24	0.24	0.23
HRH1	73	91	854	135	148	94	102	48	366	143	102	142	-0.23	0.23	0.72
PTK6	84	329	4875	49	4296	77	218	1638	76	113	113	2313	-0.22	0.22	0.05
TYRO3	106	2683	52	19	8177	165	154	131	53	41	131	1368	-0.22	0.22	0.1
GRM4	110	62	1157	102	106	102	403	137	159	121	137	104	-0.22	0.22	1.32
PSG8	114	118	1146	255	1512	139	87	220	162	135	139	701	-0.2	0.2	0.2
EPHB4	121	1765	8315	66	12960	120	1406	3456	146	134	146	5040	-0.19	0.19	0.03
NTSR2	64	90	767	209	202	60	86	89	556	38	86	206	-0.19	0.19	0.42
RAF1	71	498	9733	7889	105	51	396	11187	29	95	95	4194	-0.18	0.18	0.02
HTR2A	175	187	234	411	110	143	221	232	205	215	215	211	-0.18	0.18	1.02
JAK2	61	59	3721	61	4342	1158	56	91	80	49	80	1891	-0.18	0.18	0.04
MC1R	77	392	201	1022	123	83	85	585	746	105	105	297	-0.16	0.16	0.35
FLT1	47	827	13837	698	6745	22	18	10570	58	226	58	3786	-0.16	0.16	0.02
EPHA7	130	1831	7267	95	6179	100	781	7712	166	74	166	4005	-0.16	0.16	0.04
EPHA3	111	1284	2911	41	5985	217	138	3186	56	47	138	2098	-0.15	0.15	0.07
SIK2	78	2609	212	26	4963	1861	108	3102	52	40	108	1411	-0.14	0.14	0.08
FYN	27	203	104	14	678	30	46	238	23	25	30	154	-0.14	0.14	0.2
RNF145	113	9	177	956	43	166	193	138	117	77	138	110	-0.14	0.14	1.25
CSMD3	54	57	313	100	582	58	41	95	91	67	67	207	-0.12	0.12	0.32
GHSR	133	164	860	392	882	78	65	168	716	244	168	626	-0.12	0.12	0.27
CACNA1C	151	30	724	166	151	390	306	188	36	101	188	159	-0.1	0.1	1.19
BDKRB1	91	117	283	942	9	106	191	43	686	120	120	200	-0.09	0.09	0.6
NPC1	192	121	793	775	356	236	213	327	726	220	236	566	-0.09	0.09	0.42
TRHR	67	22	241	296	153	72	140	92	147	90	92	197	-0.09	0.09	0.47
AXL	12	21	11	7	10	14	9	3	27	17	14	11	-0.08	0.08	1.33
HCK	24	430	19	10	1855	27	38	545	21	12	27	225	-0.08	0.08	0.12
EP300	117	307	958	812	1025	396	79	1737	143	107	143	885	-0.07	0.07	0.16
SRC	18	49	63	8	400	7	34	36	19	8	19	56	-0.07	0.07	0.34
FGFR2	76	521	8457	302	6022	199	33	9131	104	96	104	3272	-0.07	0.07	0.03
LPO	169	279	335	311	559	285	67	210	612	154	210	323	-0.06	0.06	0.65
MT-CYB	92	399	863	854	3870	121	105	1335	421	83	121	859	-0.05	0.05	0.14
ADRA1B	181	416	195	136	40	311	142	47	682	225	225	166	-0.05	0.05	1.36
HRH3	29	2	107	78	30	34	42	25	66	28	34	54	-0.04	0.04	0.63
YES1	8	44	12	3	399	11	17	24	7	6	11	28	-0.04	0.04	0.39
GPR146	163	280	903	3476	412	73	204	1786	2232	182	204	658	-0.03	0.03	0.31
FGR	7	68	17	5	739	10	20	56	10	7	10	43	-0.03	0.03	0.24
ADGRV1	191	826	338	437	2312	50	137	1831	571	235	235	632	-0.02	0.02	0.37
OR10J1	155	92	183	1426	234	150	194	363	697	189	194	209	-0.02	0.02	0.93
SLC22A3	68	60	49	444	218	84	92	219	81	112	92	139	-0.02	0.02	0.66
ATP13A2	66	319	449	319	433	411	73	59	1026	88	88	376	-0.02	0.02	0.23
KISS1R	161	294	363	341	3112	202	134	217	507	166	202	352	-0.01	0.01	0.57
LMBRD1	193	178	620	211	2300	237	190	90	256	405	237	416	-0.01	0.01	0.57
SCN4A	90	82	277	150	467	244	112	120	155	86	120	214	-0.01	0.01	0.56
USH2A	134	468	190	445	2959	75	89	1206	168	224	168	457	0	0	0.37
JAK3	65	93	82	65	3247	292	32	304	86	39	86	88	0.04	0.04	0.98
LCK	3	6	7	1	89	1	3	10	18	1	3	7	0.04	0.04	0.46
OR5D14	167	640	558	948	170	420	209	177	2636	167	209	599	0.05	0.05	0.35
PDGFRA	30	685	2980	25	2810	43	7	7186	14	36	36	1748	0.05	0.05	0.02
HTR1D	148	778	122	236	277	216	143	125	2162	186	186	257	0.06	0.06	0.73
HTR3D	185	250	145	2062	92	228	177	93	2281	319	228	198	0.06	0.06	1.15
ZBED6	98	491	516	213	52	394	126	86	1808	125	126	352	0.06	0.06	0.36
LTK	55	120	32	108	280	310	35	67	126	53	67	114	0.07	0.07	0.59
OR6V1	153	184	1388	1229	210	96	192	369	3077	108	192	720	0.07	0.07	0.27
ADGRG4	189	453	513	353	1849	1403	232	140	846	199	232	483	0.07	0.07	0.48
ABCC1	157	27	571	277	134	134	269	451	199	158	199	206	0.07	0.07	0.97
KEAP1	135	77	885	230	429	117	259	1313	169	115	169	330	0.08	0.08	0.51
GPR101	108	17	406	103	34	168	70	46	135	307	135	69	0.09	0.09	1.97
PROM2	199	339	161	271	791	180	244	675	389	153	244	305	0.09	0.09	0.8
CD84	152	200	798	158	2098	190	150	1205	148	594	190	499	0.1	0.1	0.38
SLC5A11	69	63	84	232	67	29	147	313	57	92	92	76	0.13	0.13	1.22
SLC7A5	139	245	123	275	99	283	176	84	691	131	176	184	0.13	0.13	0.96
MAP3K7	104	128	117	55	63	36	47	148	263	129	129	90	0.13	0.13	1.43
GABBR1	174	534	171	97	243	2313	832	115	88	214	214	207	0.14	0.14	1.03
CSF1R	42	40	1635	11	5857	52	4	6030	2	68	52	838	0.14	0.14	0.06
ALK	143	113	304	46	1199	179	37	337	516	148	179	209	0.14	0.14	0.86
HTR6	162	80	40	149	833	231	60	30	232	202	202	115	0.15	0.15	1.76
PTGIR	136	380	233	462	1398	299	169	99	1999	161	169	421	0.16	0.16	0.4
NPBWR1	40	41	383	332	53	123	50	40	1287	46	50	193	0.17	0.17	0.26
PGAP6	124	116	343	176	497	125	156	176	643	119	156	260	0.17	0.17	0.6
VIPR2	49	16	221	70	182	59	54	60	310	60	60	126	0.17	0.17	0.48
GRM8	123	13	362	203	62	215	136	398	151	85	151	133	0.17	0.17	1.14
GPR6	149	369	475	631	235	284	164	187	3193	106	187	422	0.18	0.18	0.44
MIEF2	107	323	349	215	894	113	82	281	1942	132	132	336	0.18	0.18	0.39
MFSD14B	172	162	971	649	1542	157	212	348	3320	173	212	810	0.2	0.2	0.26
OR13H1	146	556	247	193	183	687	181	130	2475	184	184	220	0.2	0.2	0.84
CHRM4	83	268	78	895	209	112	151	98	3356	89	112	239	0.21	0.21	0.47
P2RY4	63	119	126	388	229	85	49	94	1509	61	85	178	0.21	0.21	0.48
PDGFRB	34	64	372	12	493	40	6	2150	5	195	40	218	0.22	0.22	0.18
GPR25	141	110	93	171	409	403	128	53	181	178	178	141	0.24	0.24	1.27
SLC14A2	89	94	50	184	173	516	215	41	119	98	119	134	0.24	0.24	0.89
PRRT4	186	422	89	74	996	230	206	317	116	1312	230	256	0.24	0.24	0.9
PIGB	196	153	157	589	102	154	239	74	1001	383	239	155	0.25	0.25	1.54
NTSR1	52	37	189	122	179	53	61	142	577	63	63	151	0.27	0.27	0.42
HAS1	145	47	154	191	115	274	183	39	203	99	183	135	0.3	0.3	1.36
SLC26A1	198	261	138	259	76	835	243	83	1469	174	243	199	0.31	0.31	1.22
CACNA1F	168	89	327	187	310	261	113	141	1039	209	209	249	0.32	0.32	0.84
PIEZO2	59	35	28	76	315	70	77	118	184	59	77	56	0.32	0.32	1.39
F2R	194	140	208	185	208	81	286	237	248	204	237	197	0.37	0.37	1.21
SERPINE1	180	145	219	157	684	158	139	483	700	223	223	188	0.37	0.37	1.19
SLC6A4	81	65	66	125	91	243	91	52	176	109	109	79	0.39	0.39	1.39

## Sheet: S9
Model	Drug encoder	Protein encoder	Training set
1	CNN	CNN	DAVIS
2	CNN	CNN	BindingDB
3	Morgan	CNN	BindingDB
4	Morgan	CNN	DAVIS
5	Morgan	AAC	KIBA
6	MPNN	CNN	BindingDB
7	MPNN	CNN	KIBA
8	MPNN	CNN	DAVIS
9	Transformer	CNN	BindingDB
10	Daylight	AAC	DAVIS
11	Daylight	AAC	KIBA
12	Daylight	AAC	BindingDB
13	Morgan	AAC	BindingDB
14	Morgan	AAC	DAVIS

## Sheet: S10
Sample ID utilised in project
Kupio_Adipose_Fasting	McMaster_Adipose_Fasting	Keller_Adipose_Fasting	SMP_Muscle_Fasting	Gallagher_Muscle_Fasting	LVL90_Muscle_Fasting	S1_S2_Muscle_Fasting	RET_Muscle_Fasting	McMaster_Muscle_Fasting	MP_Muscle_Delta_analysis	S1_2_Muscle_Delta_analysis	RET_Muscle_Delta_analysis	McMaster_Muscle_Delta_analysis	McMaster_Adipose_Delta_analysis
GSM1724842_C01	ADI_c3040	F_16188_1	B568	CPH_17167_1	A482	S1_2_DUKE03_314	RET_MH054F	M_c3042	C330	GSM1174043_STR2_137_A_PRE_1_M	RET_AC033F	M_c3042	ADI_c3040
GSM1725305_A01	ADI_c3049	F_16722_1	B580	CPH_16783_2	A410	S1_2_DUKE04_319	RET_DW097F	M_c3050	C99	GSM1174045_STR2_139_A_PRE_1_M	RET_AS060F	M_c3050	ADI_c3049
GSM1724520_G11	ADI_c3053	F_16707_1	C147	CPH_17007_1	A431	S1_2_DUKE05_333	RET_PW031F	M_c3054	C102	GSM1174047_STR2_144_B_PRE_1_M	RET_CF093F	M_c3054	ADI_c3053
GSM1724937_A08	ADI_c3057	F_17197_1	A113	CPH_16792_1	B388	S1_2_DUKE06_339	RET_CS066F	M_c3062	A275	GSM1174055_STR2_162_D_PRE_1_M	RET_CP068F	M_c3058	ADI_c3057
GSM1724338_E01	ADI_c3061	F_16762_1	C522	CPH_16765_1	C519	S1_2_DUKE07_352	RET_SF065F	M_c3058	C9	GSM1174057_STR2_167_D_PRE_1_M	RET_CR053F	M_c3062	ADI_c3061
GSM1725556_G01	ADI_c3065	F_16734_3	A131	CPH_16716_1	B436	S1_2_DUKE08_357	RET_JA071F	M_c3074	B7	GSM1174063_STR2_175_B_PRE_1_M	RET_CS066F	M_c3066	ADI_c3065
GSM1724428_H06	ADI_c3069	F_16774_1	B433	CPH_16741_3	B544	S1_2_DUKE09_364	RET_CF093F	M_c3066	B43	GSM1174065_STR2_176_A_PRE_1_M	RET_DT067F	M_c3070	ADI_c3069
GSM1724833_A05	ADI_c3073	F_15655_2	B445	CPH_16734_3	B382	S1_2_DUKE10_372	RET_MH061F	M_c3070	C354	GSM1174069_STR2_179_C_PRE_1_M	RET_DW097F	M_c3074	ADI_c3073
GSM1724661_H03	ADI_c3077	F_16725_1	A350	CPH_15564_2	B484	S1_2_DUKE101_308	RET_SB063F	M_c3086	A455	GSM1174071_STR2_180_A_PRE_1_M	RET_ED049F	M_c3078	ADI_c3077
GSM1724381_D07	ADI_c3081	F_15497_2	C381	CPH_16738_1	C384	S1_2_DUKE102_313	RET_JB038F	M_c3078	A287	GSM1174073_STR2_182_D_PRE_1_M	RET_EH014F	M_c3082	ADI_c3081
GSM1724416_E10	ADI_c3085	F_16191_1	A374	CPH_16722_1	C501	S1_2_DUKE104_331	RET_JW087F	M_c3082	B244	GSM1174075_STR2_185_B_PRE_1_M	RET_GJ095F	M_c3086	ADI_c3085
GSM1724548_E04	ADI_c3089	F_15640_3	A386	CPH_15652_2	A461	S1_2_DUKE105_336	RET_CP068F	M_c3094	C498	GSM1174077_STR2_187_A_PRE_1_M	RET_IM023F	M_c3090	ADI_c3089
GSM1725495_F09	ADI_c3097	F_15594_2	C390	CPH_16707_1	C483	S1_2_DUKE106_351	RET_JH074F	M_c3098	A239	GSM1174079_STR2_189_C_PRE_1_M	RET_JA071F	M_c3094	ADI_c3097
GSM1724488_A11	ADI_c3105	F_16728_1	A512	CPH_17197_1	B523	S1_2_DUKE107_356	RET_RB020F	M_c3090	A137	GSM1174081_STR2_192_D_PRE_1_M	RET_JC047F	M_c3098	ADI_c3109
GSM1724963_G07	ADI_c3109	F_15537_2	C447	CPH_16719_1	B490	S1_2_DUKE108_361	RET_EH014F	M_c3102	B415	GSM1174083_STR2_198_B_PRE_1_M	RET_JC064F	M_c3102	ADI_c3113
GSM1725555_A03	ADI_c3113	F_16664_3	B412	CPH_16762_1	C462	S1_2_DUKE109_371	RET_IM023F	M_c3110	C222	GSM1174085_STR2_199_C_PRE_1_M	RET_JG040F	M_c3106	ADI_c3123
GSM1725474_H05	ADI_c3123	F_16467_1	B148	CPH_16774_1	B475	S1_2_DUKE11_379	RET_KA070F	M_c3106	C120	GSM1174087_STR2_206_B_PRE_1_M	RET_JH074F	M_c3110	ADI_c3127
GSM1724298_E04	ADI_c3127	F_15625_2	A119	CPH_17182_1	B496	S1_2_DUKE110_376	RET_MJ022F	M_c3114	B127	GSM1174089_STR2_215_C_PRE_1_M	RET_JW087F	M_c3114	ADI_c3131
GSM1724689_B02	ADI_c3131	F_15501_2	B49	CPH_17170_1	A440	S1_2_DUKE112_389	RET_ED049F	M_c3116	C57	GSM1174091_STR2_223_B_PRE_1_M	RET_KA070F	M_c3116	ADI_c3139
GSM1724320_F09	ADI_c3139	F_15552_2	B37	CPH_17131_2	A533	S1_2_DUKE114_410	RET_SJ079F	M_c3132	A164	GSM1174093_STR2_226_B_PRE_1_M	RET_LH091F	M_c3124	ADI_c3146
GSM1724413_G10	ADI_c3146	F_16140_1	C144	CPH_17191_1	A479	S1_2_DUKE115_415	RET_MT008F	M_c3128	C117	GSM1174097_STR2_235_C_PRE_1_M	RET_MH054F	M_c3128	ADI_c3149
GSM1725186_G03	ADI_c3149	F_16443_2	A158	CPH_16798_1	C456	S1_2_DUKE118_444	RET_NB021F	M_c3124	C525	GSM1174099_STR2_240_A_PRE_1_M	RET_MH061F	M_c3132	ADI_c3153
GSM1724692_G07	ADI_c3153	F_16437_2	A23	CPH_15697_2	C246	S1_2_DUKE119_448	RET_PK029F	M_c3140	C321	GSM1174101_STR2_242_D_PRE_1_M	RET_MJ022F	M_c3140	ADI_c3175
GSM1724404_B03	ADI_c3157	F_15495_2	B82	CPH_15582_2	A221	S1_2_DUKE120_456	RET_DT067F	M_c3150	B538	GSM1174103_STR2_243_A_PRE_1_M	RET_MT008F	M_c3150	ADI_c3179
GSM1725328_C04	ADI_c3169	F_15637_4	C156	CPH_16713_1	C423	S1_2_DUKE122_473	RET_JG040F	M_c3176	C528	GSM1174107_STR2_257_D_PRE_1_M	RET_PG069F	M_c3180	ADI_c3183
GSM1724533_C08	ADI_c3175	F_15558_4	A83	CPH_15655_2	B253	S1_2_DUKE123_481	RET_JB044F	M_c3188	B193	GSM1174109_STR2_268_D_PRE_1_M	RET_PK029F	M_c3184	ADI_c3187
GSM1725004_G03	ADI_c3179	F_15496_2	B283	CPH_15640_3	A230	S1_2_DUKE124_485	RET_PG069F	M_c3184	C564	GSM1174111_STR2_273_D_PRE_1_M	RET_PW031F	M_c3188	ADI_c3191
GSM1724901_E01	ADI_c3183	F_16649_1	B340	CPH_16446_2	B331	S1_2_DUKE125_492	RET_RG093F	M_c3180	B274	GSM1174113_STR2_277_C_PRE_1_M	RET_RB020F	M_c3192	ADI_c3195
GSM1724447_E11	ADI_c3187	F_16616_3	C309	CPH_16725_1	B355	S1_2_DUKE126_705	RET_GJ095F	M_c3200	A566	GSM1174115_STR2_281_C_PRE_1_M	RET_RG093F	M_c3196	ADI_c3199
GSM1724924_E04	ADI_c3191	F_16470_3	A302	CPH_16191_1	B247	S1_2_DUKE127_709	RET_RP012F	M_c3196	A524	GSM1174119_STR2_314_E_PRE_1_M	RET_RN039F	M_c3200	ADI_c3203
GSM1725485_A01	ADI_c3195	F_16431_4	C234	CPH_15594_2	C360	S1_2_DUKE128_718	RET_LH091F	M_c3192	B586	GSM1174121_STR2_316_E_PRE_1_M	RET_RP012F	M_c3204	ADI_c3207
GSM1724402_H08	ADI_c3199	F_16107_3	A224	CPH_15685_1	A335	S1_2_DUKE129_726	RET_CR053F	M_c3204	B589	GSM1174127_STR2_330_B_PRE_1_M	RET_SB063F	M_c3208	ADI_c3211
GSM1725510_D10	ADI_c3203	F_16167_3	B286	CPH_16728_1	B403	S1_2_DUKE13_393	RET_RN039F	M_c3212	A584	GSM1174129_STR2_334_D_PRE_1_M	RET_SF065F	M_c3212	ADI_c3215
GSM1725501_G08	ADI_c3207	F_15570_4	C252	CPH_15537_2	A320	S1_2_DUKE130_739	RET_AC033F	M_c3208	C558	GSM1174131_STR2_335_E_PRE_1_M	RET_SH041F	M_c3216	ADI_c3219
GSM1725057_H05	ADI_c3211	F_15588_4	C123	CPH_16664_3	B280	S1_2_DUKE131_743	RET_JC047F	M_c3224	C15	GSM1174135_STR2_352_F_PRE_1_M	RET_TW003F	M_c3220	ADI_c3223
GSM1724375_F09	ADI_c3215	F_16173_4	C177	CPH_17104_2	B262	S1_2_DUKE15_411	RET_TW003F	M_c3216	A347	GSM1174137_STR2_354_E_PRE_1_M	RET_AC033L	M_c3224	ADI_c3227
GSM1724979_E04	ADI_c3219	F_15661_3	B61	CPH_17146_2	C216	S1_2_DUKE17_421	RET_JC064F	M_c3220	C546	GSM1174139_STR2_356_F_PRE_1_M	RET_AS060L	M_c3228	ADI_c3231
GSM1725296_H09	ADI_c3223	F_15667_3	B145	CPH_15534_2	C489	S1_2_DUKE18_433	RET_SH041F	M_c3232	C540	GSM1174143_STR2_359_E_PRE_1_M	RET_CF093L	M_c3240	ADI_c3239
GSM1725372_C07	ADI_c3227	F_16122_4	A62	CPH_15682_2	C240	S1_2_DUKE19_436	RET_AS060F	M_c3228	A548	GSM1174145_STR2_361_F_PRE_1_M	RET_CP068L	M_c3244	ADI_c3243
GSM1724523_C01	ADI_c3231	F_16155_3	B121	CPH_17013_1	B316	S1_2_DUKE21_449		M_c3240	B376	GSM1174147_STR2_366_F_PRE_1_M	RET_CR053L	M_c3248	ADI_c3247
GSM1725530_C06	ADI_c3239	F_16640_3	C84	CPH_16613_4	C351	S1_2_DUKE22_457		M_c3248	B196	GSM1174151_STR2_379_E_Pre_1_M	RET_CS066L	M_c3252	ADI_c3251
GSM1724437_H06	ADI_c3243	F_15516_4	A518	CPH_17152_4	A392	S1_2_DUKE24_482		M_c3244	C30	GSM1174042_STR2_137_A_POST_1_M	RET_DT067L	M_c3256	ADI_c3255
GSM1725489_H03	ADI_c3247		B112	CPH_16744_1	B448	S1_2_DUKE26_701		M_c3256	C459	GSM1174044_STR2_139_A_POST_1_M	RET_DW097L	M_c3260	ADI_c3259
GSM1725015_G11	ADI_c3251		B91	CPH_16661_4	C312	S1_2_DUKE27_706		M_c3252	A551	GSM1174046_STR2_144_B_POST_1_M	RET_ED049L	M_c3264	ADI_c3263
GSM1724433_E12	ADI_c3255		A50	CPH_15501_2	C267	S1_2_DUKE28_711		M_c3260	B295	GSM1174054_STR2_162_D_POST_1_M	RET_EH014L	M_c3268	ADI_c3267
GSM1725251_A07	ADI_c3259		C441	CPH_16619_3	C192	S1_2_DUKE30_731		M_c3264	A140	GSM1174056_STR2_167_D_POST_1_M	RET_GJ095L	M_c3272	ADI_c3271
GSM1725263_D10	ADI_c3263		A488	CPH_16467_1	A197	S1_2_DUKE31_740		M_c3272	A116	GSM1174062_STR2_175_B_POST_1_M	RET_IM023L	M_c3280	ADI_c3279
GSM1725318_C07	ADI_c3267		B289	CPH_15625_2	A263	S1_2_DUKE34_304		M_c3268	A494	GSM1174064_STR2_176_A_POST_1_M	RET_JA071L	M_c3284	ADI_c3283
GSM1725012_H10	ADI_c3271		C288	CPH_15552_2	C198	S1_2_DUKE35_311		M_c3284	A8	GSM1174068_STR2_179_C_POST_1_M	RET_JC047L	M_c3292	ADI_c3294
GSM1725431_F11	ADI_c3279		B211	CPH_16140_1	C261	S1_2_DUKE36_316		M_c3288	C6	GSM1174070_STR2_180_A_POST_1_M	RET_JC064L	M_c3298	ADI_c3297
GSM1725646_F09	ADI_c3283		C231	CPH_16443_2	B481	S1_2_DUKE37_329		M_c3280	B190	GSM1174072_STR2_182_D_POST_1_M	RET_JG040L	M_c3302	ADI_c3301
GSM1725306_D07	ADI_c3287		A383	CPH_16437_2	A425	S1_2_DUKE39_340		M_c3298	A377	GSM1174074_STR2_185_B_POST_1_M	RET_JH074L	M_c3306	ADI_c3305
GSM1724655_C11	ADI_c3294		A86	CPH_15619_2	A497	S1_2_DUKE40_354		M_c3302	A326	GSM1174076_STR2_187_A_POST_1_M	RET_JW087L	M_c3310	ADI_c3309
GSM1725117_G03	ADI_c3297		C324	CPH_16485_4	B442	S1_2_DUKE41b_359		M_c3306	C168	GSM1174078_STR2_189_C_POST_1_M	RET_KA070L	M_c3314	ADI_c3313
GSM1724905_A11	ADI_c3301		A314	CPH_17110_4	C408	S1_2_DUKE42_366		M_c3310	B175	GSM1174080_STR2_192_D_POST_1_M	RET_LH091L	M_c3318	ADI_c3317
GSM1725627_H03	ADI_c3305		A446	CPH_15628_4	A185	S1_2_DUKE43_374		M_c3318	B559	GSM1174082_STR2_198_B_POST_1_M	RET_MH054L	M_c3322	ADI_c3321
GSM1724677_F04	ADI_c3309		A311	CPH_17001_2	B478	S1_2_DUKE44_380		M_c3314	B181	GSM1174084_STR2_199_C_POST_1_M	RET_MH061L	M_c3326	ADI_c3325
GSM1724981_A10	ADI_c3313		A281	CPH_17134_4	C465	S1_2_DUKE47_406		M_c3322	B298	GSM1174086_STR2_206_B_POST_1_M	RET_MJ022L	M_c3332	ADI_c3328
GSM1725160_C06	ADI_c3317		A248	CPH_16410_2	C348	S1_2_DUKE49_417		M_c3332	A428	GSM1174088_STR2_215_C_POST_1_M	RET_MT008L	M_c3336	ADI_c3331
GSM1724364_B09	ADI_c3321		A188	CPH_15670_4	A317	S1_2_DUKE50_423		M_c3326	A176	GSM1174090_STR2_223_B_POST_1_M	RET_PG069L	M_c3346	ADI_c3335
GSM1725545_A07	ADI_c3325		C243	CPH_15558_4	C255	S1_2_DUKE51_430		M_c3336	A143	GSM1174092_STR2_226_B_POST_1_M	RET_PK029L	M_c3350	ADI_c3338
GSM1725138_H01	ADI_c3328		A212	CPH_16795_3	C435	S1_2_DUKE53_446		M_c3342	A53	GSM1174096_STR2_235_C_POST_1_M	RET_PW031L	M_c3354	ADI_c3345
GSM1724474_A08	ADI_c3331		B151	CPH_15496_2	B526	S1_2_DUKE54_453		M_c3354	B130	GSM1174098_STR2_240_A_POST_1_M	RET_RB020L	M_c3358	ADI_c3349
GSM1724999_G09	ADI_c3335		C69	CPH_15494_2	B343	S1_2_DUKE56_465		M_c3346	B136	GSM1174100_STR2_242_D_POST_1_M	RET_RG093L	M_c3362	ADI_c3353
GSM1725198_H08	ADI_c3338		C42	CPH_16473_4	B454	S1_2_DUKE57_475		M_c3350	A203	GSM1174102_STR2_243_A_POST_1_M	RET_RN039L	M_c3370	ADI_c3357
GSM1725511_E06	ADI_c3341		A56	CPH_16655_4	C480	S1_2_DUKE58_483		M_c3358	B28	GSM1174106_STR2_257_D_POST_1_M	RET_RP012L	M_c3041	ADI_c3361
GSM1724798_D02	ADI_c3345		B22	CPH_15637_4	A359	S1_2_DUKE61_707		M_c3362	B31	GSM1174108_STR2_268_D_POST_1_M	RET_SB063L	M_c3048	ADI_c3365
GSM1725270_A10	ADI_c3349		C21	CPH_15504_4	A404	S1_2_DUKE62_715		M_c3370	C600	GSM1174110_STR2_273_D_POST_1_M	RET_SF065L	M_c3052	ADI_c3369
GSM1724927_H06	ADI_c3353		C327		A389	S1_2_DUKE64_735		M_c3366	C195	GSM1174112_STR2_277_C_POST_1_M	RET_SH041L	M_c3056	ADI_c3039
GSM1725154_F09	ADI_c3357		C453		C426	S1_2_DUKE65b_741			C582	GSM1174114_STR2_281_C_POST_1_M	RET_TW003L	M_c3060	ADI_c3047
GSM1725040_H03	ADI_c3361		A539		C333	S1_2_DUKE66_749			B352	GSM1174118_STR2_314_E_POST_1_M		M_c3064	ADI_c3051
GSM1725145_D02	ADI_c3365		C330		C438	S1_2_DUKE67_754			B424	GSM1174120_STR2_316_E_POST_1_M		M_c3068	ADI_c3055
GSM1725470_D05	ADI_c3369		A251		B397	S1_2_DUKE68_305			B595	GSM1174126_STR2_330_B_POST_1_M		M_c3072	ADI_c3059
GSM1724876_B05			C141		B268	S1_2_DUKE69_312			B565	GSM1174128_STR2_334_D_POST_1_M		M_c3076	ADI_c3063
GSM1724968_H02			C99		A449	S1_2_DUKE70_317			C570	GSM1174130_STR2_335_E_POST_1_M		M_c3080	ADI_c3067
GSM1724908_F11			C102		B532	S1_2_DUKE72_335			A590	GSM1174134_STR2_352_F_POST_1_M		M_c3084	ADI_c3071
GSM1725189_E06			A275		C306	S1_2_DUKE74_355			A584_post	GSM1174136_STR2_354_E_POST_1_M		M_c3088	ADI_c3075
GSM1724317_B01			C9		A296	S1_2_DUKE77_375			B220	GSM1174138_STR2_356_F_POST_1_M		M_c3092	ADI_c3079
GSM1725062_H11			B7		A422	S1_2_DUKE78_382			A503	GSM1174142_STR2_359_E_POST_1_M		M_c3096	ADI_c3083
GSM1724337_G05			B4		C444	S1_2_DUKE79_387			A92	GSM1174144_STR2_361_F_POST_1_M		M_c3100	ADI_c3087
GSM1725460_C04			B43		B241	S1_2_DUKE80_401			A587	GSM1174146_STR2_366_F_POST_1_M		M_c3104	ADI_c3095
GSM1725113_F02			C354		A443	S1_2_DUKE82_414			C534	GSM1174150_STR2_379_E_POST_1_M		M_c3108	ADI_c3107
GSM1724470_H01			A455		B367	S1_2_DUKE83_418			A299			M_c3112	ADI_c3111
GSM1724354_D05			A287		A419	S1_2_DUKE84_425			C375			M_c3115	ADI_c3121
GSM1724856_F06			B244		C315	S1_2_DUKE85_434			A98			M_c3122	ADI_c3125
GSM1724957_E11			C498		B577	S1_2_DUKE86_439			A146			M_c3126	ADI_c3129
GSM1724325_A04			A239		B256	S1_2_DUKE87_447			C459_post			M_c3130	ADI_c3137
GSM1724377_B06			A137		C429	S1_2_DUKE88_455			B574			M_c3138	ADI_c3145
GSM1725150_B08			B415		A476	S1_2_DUKE90_466						M_c3148	ADI_c3147
GSM1724419_B11			C222		C477	S1_2_DUKE92_484						M_c3178	ADI_c3151
GSM1725417_C01			C120			S1_2_DUKE94_704						M_c3182	ADI_c3173
GSM1724874_D10			B127			S1_2_DUKE95_708						M_c3186	ADI_c3177
GSM1724694_E12			C57			S1_2_DUKE98_738						M_c3190	ADI_c3181
GSM1724480_B10			A164									M_c3194	ADI_c3185
GSM1724334_D05			C117									M_c3198	ADI_c3189
GSM1724654_C05			B166									M_c3202	ADI_c3193
GSM1725402_D08			C525									M_c3206	ADI_c3197
GSM1724394_H10			C321									M_c3210	ADI_c3201
GSM1725205_G02			B538									M_c3214	ADI_c3205
GSM1725181_H08			C528									M_c3218	ADI_c3209
GSM1724551_D07			B193									M_c3222	ADI_c3213
GSM1724616_E09			C564									M_c3226	ADI_c3217
GSM1724714_F12			B274									M_c3238	ADI_c3221
GSM1724779_B06			A566									M_c3242	ADI_c3225
GSM1725106_D07			A464									M_c3246	ADI_c3229
GSM1725227_C05			A524									M_c3250	ADI_c3237
GSM1725319_A01			B586									M_c3254	ADI_c3241
GSM1724339_C09			B589									M_c3258	ADI_c3245
GSM1724920_F09			A584									M_c3262	ADI_c3249
GSM1724709_E04			C558									M_c3266	ADI_c3253
GSM1725348_A01			C15									M_c3270	ADI_c3257
GSM1724297_B04			A347									M_c3278	ADI_c3261
GSM1725438_H09			B160									M_c3282	ADI_c3265
GSM1725313_F02			A536									M_c3290	ADI_c3269
GSM1724746_D06			C546									M_c3296	ADI_c3277
GSM1725507_E06			A557									M_c3300	ADI_c3281
GSM1725173_F10			C540									M_c3304	ADI_c3293
GSM1725196_H08			A548									M_c3308	ADI_c3295
GSM1724699_A04			B376									M_c3312	ADI_c3299
GSM1724472_B02			B196									M_c3316	ADI_c3303
GSM1725504_C02			C30									M_c3320	ADI_c3307
GSM1724651_D06			C93									M_c3324	ADI_c3311
GSM1724529_B07			C459									M_c3330	ADI_c3315
GSM1724539_H07			A551									M_c3334	ADI_c3319
GSM1724621_F05			C33									M_c3344	ADI_c3323
GSM1724584_D03			C45									M_c3348	ADI_c3327
GSM1724800_G09			B184									M_c3352	ADI_c3329
GSM1724993_A06			A308									M_c3356	ADI_c3333
GSM1725047_D12			A473									M_c3360	ADI_c3337
GSM1724916_E02			C471									M_c3368	ADI_c3343
GSM1725405_G08			C507										ADI_c3347
GSM1724910_H06			C516										ADI_c3351
GSM1724282_E09			B493										ADI_c3355
GSM1725105_G04			A407										ADI_c3359
GSM1724628_B10			A323										ADI_c3363
GSM1724853_A01			B319										ADI_c3367
GSM1725092_F12			A401
GSM1725458_G11			C339
GSM1724732_H07			B421
GSM1725002_A05			A458
GSM1725419_B11			A329
GSM1725621_A06			C174
GSM1724849_E01			A71
GSM1725153_C07			B172
GSM1724995_F05			C75
GSM1725523_G02			C129
GSM1724546_F10			A26
GSM1724664_F09			A218
GSM1725100_B09			A236
GSM1724361_E05			B304
GSM1724843_G11			A227
GSM1724421_B11			C294
GSM1724962_C11			B205
GSM1725579_E07			B229
GSM1724864_B06			B259
GSM1724870_D07			A80
GSM1725085_F11			A95
GSM1725324_G08			A77
GSM1724611_C08			B133
GSM1724645_B05			B115
GSM1725230_D03			C150
GSM1725249_H03			C366
GSM1724379_B10			A509
GSM1724903_A03			C342
GSM1724342_C07			A200
GSM1725026_C09			A272
GSM1724281_D07			A266
GSM1724556_B12			A209
GSM1724945_F07			B109
GSM1724452_H05			A65
GSM1725185_D07			B139
GSM1724972_C09			A155
GSM1724625_H04			C279
GSM1725267_E08			A89
GSM1725031_C03			A17
GSM1724967_E03			B337
GSM1724482_G11			C270
GSM1724350_F03			B277
GSM1724612_D08			B301
GSM1724639_G08			C291
GSM1725253_C03			B250
GSM1724731_C12			B451
GSM1725359_B02			A170
GSM1724469_H11			C285
GSM1724700_C08			A41
GSM1725021_D07			B97
GSM1724649_D02			A101
GSM1725101_D09			A59
GSM1724328_E02			C111
GSM1724668_F08			C135
GSM1725505_E05			A125
GSM1724290_C05
GSM1724340_E12
GSM1724851_D09
GSM1724859_G10
GSM1725046_F07
GSM1725162_C07
GSM1725558_B07
GSM1725275_D12
GSM1724767_E06
GSM1724275_D10
GSM1724725_D01
GSM1725120_B02
GSM1724287_G04
GSM1725635_F08
GSM1724386_H11
GSM1724894_D11
GSM1724359_H04
GSM1724716_C03
GSM1725072_B05
GSM1725034_H06
GSM1724311_A05
GSM1724902_F03
GSM1725323_E01
GSM1725086_F11
GSM1724410_D02
GSM1724866_B07
GSM1725207_E03
GSM1725234_E07
GSM1724784_H04
GSM1724392_D06
GSM1725098_E06
GSM1725204_G11
GSM1724467_H11
GSM1725451_F01
GSM1724582_F04
GSM1724759_E01
GSM1725486_B04
GSM1724527_F01
GSM1724831_G03
GSM1724436_B05
GSM1725395_A03
GSM1724830_H06
GSM1725353_H05
GSM1724511_E07
GSM1724765_F08
GSM1724449_E01
GSM1724614_G09
GSM1724710_A11
GSM1724878_F08
GSM1725168_D08
GSM1725503_F04
GSM1724435_D12
GSM1724289_H04
GSM1724782_E04
GSM1724990_F03
GSM1724478_B08
GSM1724506_D08
GSM1724973_H09
GSM1725164_H09
GSM1724501_D05
GSM1725537_F05
GSM1724756_G03
GSM1725379_H10
GSM1724450_C01
GSM1724557_C12
GSM1724804_B03
GSM1724400_A04
GSM1724514_G10
GSM1725339_G03
GSM1725051_D05
GSM1724885_D01
GSM1724465_B03
GSM1724869_D02
GSM1724855_H11
GSM1725191_B12
GSM1724457_G07
GSM1724579_C12
GSM1725317_E02
GSM1724310_E10
GSM1724380_H10
GSM1725050_F09
GSM1724803_A11
GSM1724848_E02
GSM1725500_A07
GSM1725233_F12
GSM1724560_F05
GSM1725455_G07
GSM1725498_H02
GSM1724384_C02
GSM1724904_G04
GSM1725294_H06
GSM1724633_C01
GSM1724494_B08
GSM1724923_E04
GSM1724992_H11
GSM1724314_A06
GSM1724553_E08
GSM1725223_C11
GSM1724444_D04
GSM1724769_B02
GSM1725049_D10
GSM1724395_C10
GSM1725327_C09
GSM1724357_B12
GSM1725385_F10
GSM1724841_G08
GSM1724676_B06
GSM1724643_A08
GSM1724840_E08
GSM1724515_G04
GSM1724383_G08
GSM1725472_F02
GSM1724829_E04
GSM1725440_E08
GSM1725614_G11
GSM1725525_C12
GSM1724355_A08
GSM1724726_F03
GSM1725025_F11
GSM1725490_E03
GSM1725195_C01
GSM1724884_A04
GSM1724454_F05
GSM1724420_G07
GSM1724559_H03
GSM1724301_F08
GSM1724789_G05
GSM1724507_G09
GSM1725029_H04
GSM1724321_A10
GSM1724828_B01
GSM1724403_A04
GSM1724292_G09
GSM1725166_A12
GSM1724347_D01
GSM1724498_A03
GSM1724983_H10
GSM1724369_D07
GSM1724640_D11
GSM1724707_A11
GSM1725190_B10
GSM1724736_F06
GSM1725499_G11
GSM1725243_F02
GSM1724430_H07
GSM1725478_D10
GSM1725608_G01
GSM1724316_G09
GSM1725104_E08
GSM1724439_B04
GSM1724886_C05
GSM1725258_A08
GSM1724569_E05
GSM1724712_A12
GSM1725291_E10
GSM1724558_A10
GSM1724463_C04
GSM1724887_H09
GSM1725177_B07
GSM1725526_B01
GSM1724747_F11
GSM1724466_B05
GSM1724861_C05
GSM1724742_C01
GSM1725439_H05
GSM1724305_A06
GSM1724929_B02
GSM1724555_C04
GSM1724308_H08
GSM1724360_D06
GSM1724399_C03
GSM1724475_D03
GSM1724522_H10
GSM1725053_B08
GSM1724583_H11
GSM1724895_D09
GSM1725180_B11
GSM1724682_A06
GSM1725519_H02
GSM1724541_F05
GSM1724484_C10
GSM1725224_B05
GSM1724315_A03
GSM1724667_G10
GSM1724813_E11
GSM1724313_E08
GSM1724567_H08
GSM1725493_G02
GSM1724783_A11
GSM1724919_C03
GSM1724648_D11
GSM1725171_B05
GSM1724623_A07
GSM1725089_B09
GSM1725116_D09
GSM1724564_H02
GSM1724727_D04
GSM1724701_F06
GSM1725514_F07
GSM1724618_D09
GSM1724642_D02
GSM1724512_A04
GSM1724390_G11
GSM1725432_H05
GSM1725252_A08
GSM1725553_D12
GSM1724371_E05
GSM1724988_D05
GSM1725463_A04
GSM1724679_G01
GSM1725139_C08
GSM1725211_A10
GSM1724349_E12
GSM1725245_B09
GSM1725381_E12
GSM1725326_B12
GSM1724574_H10
GSM1724872_G06
GSM1725520_H06
GSM1725096_D11
GSM1725573_H06
GSM1724566_F07
GSM1724907_C06
GSM1724961_D04
GSM1724518_D10
GSM1724706_H05
GSM1725112_D05
GSM1724606_A12
GSM1725473_D06
GSM1725030_E12
GSM1725538_G03
GSM1724303_A09
GSM1724330_C03
GSM1724683_H08
GSM1724669_F07
GSM1724822_F02
GSM1724406_F05
GSM1724771_F05
GSM1725132_F03
GSM1725151_G06
GSM1724761_A11
GSM1725108_C02
GSM1724964_C11
GSM1725595_F03
GSM1724641_E10
GSM1724540_E12
GSM1724796_E02
GSM1724845_G03
GSM1725014_A01
GSM1725488_E08
GSM1725055_C07
GSM1724479_A07
GSM1724806_D01
GSM1724440_C11
GSM1725133_G08
GSM1725041_E05
GSM1725437_B04
GSM1725271_E09
GSM1724374_C06
GSM1725076_A05
GSM1725299_H04
GSM1725178_B09
GSM1724939_A05
GSM1725240_B09
GSM1724877_G06
GSM1724358_A03
GSM1725561_E04
GSM1724696_F08
GSM1725285_A09
GSM1724893_G08
GSM1724773_B05
GSM1725103_F02
GSM1725492_E05
GSM1724825_G03
GSM1725183_D01
GSM1725407_A11
GSM1725303_H08
GSM1725429_F08
GSM1725167_G02
GSM1724600_C01
GSM1724705_A03
GSM1725134_B10
GSM1725149_E08
GSM1725528_D12
GSM1725471_G05
GSM1724970_F12
GSM1724335_A12
GSM1724678_E01
GSM1724284_E03
GSM1725231_D11
GSM1724790_A12
GSM1724935_G04
GSM1725273_D07
GSM1724543_A08
GSM1724687_B09
GSM1725513_G06
GSM1724577_C10
GSM1724549_C05
GSM1725445_C10
GSM1724715_F03
GSM1724288_F03
GSM1725038_G06
GSM1724353_C04
GSM1724891_A08
GSM1724530_A09
GSM1724401_H05
GSM1725615_G02
GSM1724638_A02
GSM1724662_A12
GSM1725102_B06
GSM1724398_E11
GSM1724417_A11
GSM1724497_C11
GSM1724468_F04
GSM1725246_B05
GSM1725616_A06
GSM1724489_E03
GSM1724619_B06
GSM1724942_A06
GSM1725369_F06
GSM1724572_C02
GSM1725618_B02
GSM1724733_D01
GSM1724585_D11
GSM1725000_F12
GSM1724808_C02
GSM1724670_E07
GSM1724875_D05
GSM1725351_H03
GSM1724835_C12
GSM1725518_G09
GSM1725023_C05
GSM1724934_G01
GSM1725483_H04
GSM1725044_C03
GSM1725094_D03
GSM1724525_F06
GSM1724348_G08
GSM1725122_E11
GSM1724691_D09
GSM1725480_E07
GSM1724752_A02
GSM1725140_B07
GSM1725152_D09
GSM1725069_D02
GSM1725557_C02
GSM1724675_G05
GSM1724860_C04
GSM1725449_A03
GSM1724461_G03
GSM1724913_G10
GSM1724634_B03
GSM1725161_C09
GSM1724729_H05
GSM1724826_D04
GSM1725413_B10
GSM1724378_F11
GSM1724396_F03
GSM1724792_D09
GSM1725065_F03
GSM1725095_F08
GSM1724291_G06
GSM1724411_B01
GSM1725033_E09
GSM1724966_C12
GSM1725574_A08
GSM1725280_A08
GSM1724997_F04
GSM1724505_E10
GSM1724772_E10
GSM1725111_B05
GSM1725453_A10
GSM1725290_H07
GSM1725565_H06
GSM1725017_C01
GSM1724351_C09
GSM1724685_H11
GSM1725277_G04
GSM1725527_D09
GSM1724674_F02
GSM1725508_B04
GSM1724445_E02
GSM1724594_E07
GSM1724276_A05
GSM1725403_B09
GSM1724724_H09
GSM1724280_G10
GSM1725039_A12
GSM1724998_G09
GSM1724703_D01
GSM1724595_C10
GSM1724300_H02
GSM1724391_E08
GSM1725284_C02
GSM1724698_C11
GSM1724333_H02
GSM1724279_B04
GSM1725216_G05
GSM1724365_A05
GSM1724745_A11
GSM1725059_C10
GSM1724516_D03
GSM1724748_B11
GSM1724660_G01
GSM1724814_G07
GSM1724322_D11
GSM1725241_F05
GSM1725516_B11
GSM1725221_C08
GSM1725202_B01
GSM1725309_A09
GSM1724760_F06
GSM1724603_A06
GSM1725441_B10
GSM1724730_A02
GSM1724949_E04
GSM1724341_B08
GSM1724493_H07
GSM1724976_F11
GSM1724928_D03
GSM1724930_F12
GSM1725097_D05
GSM1724770_D10
GSM1724728_E09
GSM1724933_C10
GSM1724283_G01
GSM1724589_C09
GSM1725143_D11
GSM1725426_G05
GSM1724586_G11
GSM1724427_E06
GSM1724753_C07
GSM1725142_B10
GSM1724867_H02
GSM1724531_A12
GSM1724393_B09
GSM1724926_G05
GSM1725124_F10
GSM1725052_B01
GSM1725079_B10
GSM1724889_F10
GSM1724418_F10
GSM1724451_B07
GSM1724847_C12
GSM1724370_E07
GSM1724352_E08
GSM1725304_A09
GSM1725640_D05
GSM1725539_A10
GSM1725620_C05
GSM1724376_E10
GSM1724485_F11
GSM1724504_A08
GSM1725464_H05
GSM1724563_B01
GSM1724834_F11
GSM1725208_B12
GSM1725288_A03
GSM1725219_G09
GSM1724434_D07
GSM1724697_C05
GSM1724422_A06
GSM1724502_A02
GSM1724521_F04
GSM1724960_B11
GSM1724744_B07
GSM1725238_H09
GSM1724332_E07
GSM1724723_G04
GSM1725295_D01
GSM1724277_H03
GSM1725468_B01
GSM1725554_H02
GSM1725256_F05
GSM1725114_D10
GSM1725001_H06
GSM1725418_A07
GSM1725442_B08
